# Supplementary material for: Repeated Omicron infection alleviates SARS-CoV-2 immune imprinting
Source: Research Square preprint supplement (doi:10.21203/rs.3.rs-2887287/v1), 2023-05-16
Supplement: Supplementary file 1 [file 16a2083d81643a1bbdcc03ef.xlsx]

## Sheet: sheet1
mAbs from BA.1 BTI (long term) and Omicron repeated infection cohorts
			Pseudovirus IC50 (μg/mL)							VDJ				SHM
Antibody Name	Source	BA.5 Epitope Group	D614G	BA.1	BA.2	BA.5	BQ.1.1	XBB	XBB.1.5	Heavy chain V gene	Heavy chain J gene	Light chain V gene	Light chain J gene	Heavy chain SHM rate	Light chain SHM rate
BD57-0470	BA.1 BTI(8m)	--	>10	0.00311	0.00461	>10	>10	0.413	0.533	IGHV5-51	IGHJ6	IGKV3-15	IGKJ1	0.0617	0.04
BD57-0471	BA.1 BTI(8m)	C/D1	>10	0.00106	0.00139	0.00131	0.000713	>10	>10	IGHV3-15	IGHJ4	IGLV3-1	IGLJ3	0.0369	0.0313
BD57-0472	BA.1 BTI(8m)	D4	>10	0.0171	0.0147	2.75	>10	2.47	1.07	IGHV4-4	IGHJ4	IGLV2-14	IGLJ3	0.0522	0.0389
BD57-0473	BA.1 BTI(8m)	--	>10	0.00163	0.00118	3.74	>10	>10	>10	IGHV3-15	IGHJ4	IGLV3-1	IGLJ3	0.0182	0.0125
BD57-0474	BA.1 BTI(8m)	F3	>10	0.00120	0.0345	2.12	>10	>10	>10	IGHV4-59	IGHJ4	IGKV4-1	IGKJ4	0.0451	0.0206
BD57-0475	BA.1 BTI(8m)	F3	>10	0.0603	0.0315	0.0151	0.157	0.0921	0.108	IGHV4-59	IGHJ5	IGLV2-14	IGLJ2	0.0582	0.018
BD57-0477	BA.1 BTI(8m)	--	>10	0.00402	0.00457	6.72	>10	>10	>10	IGHV3-15	IGHJ4	IGLV3-1	IGLJ3	0.0262	0.0345
BD57-0478	BA.1 BTI(8m)	D3	>10	0.250	0.170	0.168	0.347	>10	>10	IGHV4-59	IGHJ1	IGLV3-25	IGLJ3	0.0443	0.0619
BD57-0479	BA.1 BTI(8m)	D3	>10	0.000589	0.0142	0.00510	1.25	0.00190	0.00243	IGHV1-8	IGHJ4	IGLV6-57	IGLJ3	0.0491	0.0634
BD57-0480	BA.1 BTI(8m)	D3	>10	0.000602	0.00215	0.00237	0.164	>10	>10	IGHV5-51	IGHJ4	IGKV1-9	IGKJ2	0.0338	0.0528
BD57-0481	BA.1 BTI(8m)	--	>10	0.00656	0.00629	>10	>10	>10	>10	IGHV2-5	IGHJ5	IGKV2-28	IGKJ2	0.0361	0.0119
BD57-0482	BA.1 BTI(8m)	--	>10	<0.0005	0.000710	>10	>10	>10	>10	IGHV3-15	IGHJ4	IGLV3-1	IGLJ2	0.0427	0.0523
BD57-0483	BA.1 BTI(8m)	D3	>10	0.00166	0.00350	0.00374	0.00796	0.0218	0.0367	IGHV5-51	IGHJ2	IGLV1-44	IGLJ1	0.0366	0.0363
BD57-0484	BA.1 BTI(8m)	F3	>10	0.000605	0.0517	1.62	>10	>10	>10	IGHV4-4	IGHJ3	IGKV4-1	IGKJ4	0.0648	0.0059
BD57-0485	BA.1 BTI(8m)	--	>10	0.000961	0.00679	>10	>10	>10	>10	IGHV3-66	IGHJ3	IGLV3-21	IGLJ3	0.0312	0.0123
BD57-0486	BA.1 BTI(8m)	F3	>10	<0.0005	0.0227	0.837	>10	>10	>10	IGHV4-59	IGHJ4	IGKV4-1	IGKJ4	0.0704	0.0059
BD57-0488	BA.1 BTI(8m)	--	>10	>10	>10	>10	>10	>10	>10	IGHV4-59	IGHJ4	IGKV1-39	IGKJ3	0.044	0.0308
BD57-0489	BA.1 BTI(8m)	--	>10	0.00417	>10	>10	>10	>10	>10	IGHV4-59	IGHJ5	IGLV1-40	IGLJ2	0.0405	0.015
BD57-0490	BA.1 BTI(8m)	B	>10	0.000552	0.00390	0.0223	0.0130	0.0309	0.00918	IGHV2-5	IGHJ5	IGKV2-28	IGKJ1	0.0438	0.0089
BD57-0491	BA.1 BTI(8m)	D3	>10	0.112	1.97	1.83	>10	>10	>10	IGHV5-51	IGHJ6	IGKV1-33	IGKJ5	0.0591	0.0246
BD57-0494	BA.1 BTI(8m)	B	0.000672	<0.0005	0.00167	<0.0005	0.000526	0.217	0.230	IGHV1-69	IGHJ3	IGKV1-33	IGKJ2	0.0495	0.0282
BD57-0495	BA.1 BTI(8m)	E2.2	4.71	>10	>10	>10	>10	>10	>10	IGHV4-39	IGHJ1	IGLV3-21	IGLJ1	0.0736	0.0634
BD57-0496	BA.1 BTI(8m)	--	0.00124	0.000778	0.00281	>10	>10	0.155	0.102	IGHV1-3	IGHJ6	IGKV1-33	IGKJ2	0.121	0.0721
BD57-0497	BA.1 BTI(8m)	--	0.476	0.963	0.170	>10	>10	1.63	4.33	IGHV1-3	IGHJ5	IGLV3-21	IGLJ2	0.0571	0.031
BD57-0498	BA.1 BTI(8m)	F1	>10	>10	>10	>10	>10	>10	>10	IGHV3-30-3	IGHJ4	IGKV1-39	IGKJ2	0.033	0.0185
BD57-0499	BA.1 BTI(8m)	E2.2	0.0709	0.177	0.00983	0.0692	0.901	>10	>10	IGHV1-69	IGHJ4	IGLV1-40	IGLJ2	0.0509	0.0299
BD57-0500	BA.1 BTI(8m)	E1/E2.1	0.00678	0.0114	0.0235	0.0126	>10	>10	>10	IGHV1-69	IGHJ6	IGLV8-61	IGLJ2	0.0423	0.0302
BD57-0501	BA.1 BTI(8m)	--	2.02	>10	1.81	1.66	2.12	1.91	2.33	IGHV3-33	IGHJ5	IGKV1-39	IGKJ1	0.0486	0.0523
BD57-0502	BA.1 BTI(8m)	B	<0.0005	<0.0005	0.000687	1.91	4.44	>10	>10	IGHV1-58	IGHJ3	IGKV3-20	IGKJ1	0.0831	0.0492
BD57-0503	BA.1 BTI(8m)	--	1.89	>10	>10	>10	>10	>10	>10	IGHV3-30	IGHJ4	IGKV1-39	IGKJ3	0.0797	0.0844
BD57-0504	BA.1 BTI(8m)	D2	0.00340	0.0947	0.0800	0.0346	>10	>10	>10	IGHV3-30	IGHJ4	IGLV1-44	IGLJ1	0.107	0.0636
BD57-0505	BA.1 BTI(8m)	D2	0.000816	0.00114	0.00162	0.00243	1.66	>10	>10	IGHV2-5	IGHJ4	IGLV2-14	IGLJ3	0.0308	0.0244
BD57-0506	BA.1 BTI(8m)	F1	0.857	>10	1.84	1.75	>10	>10	>10	IGHV3-33	IGHJ5	IGKV1-39	IGKJ1	0.0272	0.0185
BD57-0507	BA.1 BTI(8m)	F1	2.44	>10	>10	>10	>10	>10	>10	IGHV3-33	IGHJ5	IGKV1-39	IGKJ1	0.0218	0.0124
BD57-0508	BA.1 BTI(8m)	F1	1.91	>10	>10	>10	>10	>10	>10	IGHV3-13	IGHJ4	IGKV1-39	IGKJ3	0.0599	0.0462
BD57-0509	BA.1 BTI(8m)	--	0.168	>10	0.203	>10	>10	>10	>10	IGHV3-30	IGHJ4	IGLV1-44	IGLJ3	0.0658	0.0334
BD57-0510	BA.1 BTI(8m)	--	0.00175	0.000933	0.00180	>10	>10	>10	>10	IGHV1-69	IGHJ3	IGKV1-17	IGKJ2	0.1	0.0435
BD57-0511	BA.1 BTI(8m)	F1	0.834	>10	>10	>10	>10	>10	>10	IGHV3-13	IGHJ5	IGKV1-39	IGKJ1	0.0545	0.0954
BD57-0512	BA.1 BTI(8m)	F1	8.63	>10	>10	>10	>10	>10	>10	IGHV3-13	IGHJ4	IGKV1-39	IGKJ4	0.0942	0.0738
BD57-0513	BA.1 BTI(8m)	--	0.000728	0.00113	0.00271	0.00397	0.0344	>10	>10	IGHV1-58	IGHJ3	IGKV3-20	IGKJ1	0.0757	0.0492
BD57-0514	BA.1 BTI(8m)	--	0.000677	0.00387	0.00423	0.00480	>10	>10	>10	IGHV2-5	IGHJ4	IGLV2-14	IGLJ2	0.0475	0.0642
BD57-0515	BA.1 BTI(8m)	--	1.39	>10	>10	>10	>10	>10	>10	IGHV3-30	IGHJ4	IGLV3-21	IGLJ3	0.0497	0.0462
BD57-0516	BA.1 BTI(8m)	A1	0.00121	0.000541	0.00169	0.00269	0.00668	>10	>10	IGHV1-58	IGHJ3	IGKV3-20	IGKJ1	0.0568	0.04
BD57-0517	BA.1 BTI(8m)	F1	>10	>10	>10	>10	>10	>10	>10	IGHV3-64D	IGHJ4	IGKV1-39	IGKJ1	0.0495	0.0373
BD57-0518	BA.1 BTI(8m)	--	0.00146	<0.0005	0.00113	>10	>10	>10	>10	IGHV1-3	IGHJ6	IGKV1-33	IGKJ2	0.0909	0.0621
BD57-0519	BA.1 BTI(8m)	E1/E2.1	0.0161	0.0790	0.0201	0.0684	>10	1.11	1.57	IGHV4-61	IGHJ4	IGKV1-33	IGKJ4	0.0524	0.0443
BD57-0520	BA.1 BTI(8m)	--	0.000716	0.0591	0.00445	0.00139	>10	>10	>10	IGHV4-59	IGHJ3	IGLV2-14	IGLJ1	0.0754	0.0428
BD57-0521	BA.1 BTI(8m)	E1/E2.1	0.0172	0.0537	0.0163	0.0344	>10	1.20	1.18	IGHV4-61	IGHJ4	IGKV1-33	IGKJ4	0.0497	0.0376
BD57-0522	BA.1 BTI(8m)	--	1.09	0.531	0.461	0.608	>10	>10	>10	IGHV3-53	IGHJ3	IGKV1-5	IGKJ2	0.0745	0.0714
BD57-0523	BA.1 BTI(8m)	A1	0.00291	0.00221	0.00922	0.00310	0.0362	0.211	0.452	IGHV3-66	IGHJ6	IGKV3-11	IGKJ2	0.0613	0.0435
BD57-0524	BA.1 BTI(8m)	--	<0.0005	0.00149	0.00222	<0.0005	>10	>10	>10	IGHV3-9	IGHJ4	IGKV3-20	IGKJ5	0.0563	0.0244
BD57-0525	BA.1 BTI(8m)	--	0.00885	1.50	0.242	>10	>10	>10	>10	IGHV4-34	IGHJ4	IGLV1-44	IGLJ2	0.0963	0.248
BD57-0526	BA.1 BTI(8m)	--	0.00661	0.00927	0.0172	0.00912	1.85	2.92	3.12	IGHV3-53	IGHJ6	IGKV3-20	IGKJ2	0.0567	0.0215
BD57-0527	BA.1 BTI(8m)	--	0.000691	0.00137	0.00182	0.00171	0.00934	2.59	1.60	IGHV1-69	IGHJ4	IGKV1-39	IGKJ1	0.0676	0.0435
BD57-0528	BA.1 BTI(8m)	--	0.131	1.67	3.41	4.03	7.94	6.09	8.55	IGHV4-61	IGHJ4	IGKV3-20	IGKJ1	0.0961	0.0738
BD57-0529	BA.1 BTI(8m)	A1	0.00429	0.00831	0.00152	0.404	>10	>10	>10	IGHV4-38-2	IGHJ4	IGKV1-NL1	IGKJ4	0.0917	0.0523
BD57-0530	BA.1 BTI(8m)	--	0.520	>10	3.02	2.38	5.47	3.62	2.36	IGHV1-69	IGHJ4	IGLV6-57	IGLJ3	0.0307	0.0182
BD57-0967	BA.1 BTI(8m)	--	>10	<0.0005	<0.0005	>10	>10	>10	>10	IGHV4-59	IGHJ4	IGKV4-1	IGKJ4	0.0704	0.0382
BD57-0968	BA.1 BTI(8m)	A1	0.00441	0.00276	--	0.00138	0.0258	0.0138	0.0160	IGHV3-53	IGHJ3	IGKV1-9	IGKJ5	0.0491	0.0431
BD57-0969	BA.1 BTI(8m)	--	>10	1.14	--	0.947	>10	>10	>10	IGHV3-30	IGHJ4	IGKV1-9	IGKJ4	0.0297	0.0187
BD57-0970	BA.1 BTI(8m)	--	>10	0.0103	--	>10	>10	>10	>10	IGHV4-39	IGHJ4	IGKV1-5	IGKJ2	0.0256	0.0185
BD57-0972	BA.1 BTI(8m)	--	<0.0005	0.000884	--	6.40	>10	>10	>10	IGHV7-4-1	IGHJ4	IGKV1-39	IGKJ4	0.0797	0.0745
BD57-0974	BA.1 BTI(8m)	--	<0.0005	0.00180	--	<0.0005	>10	>10	>10	IGHV5-51	IGHJ4	IGKV1-16	IGKJ2	0.0496	0.0342
BD57-0976	BA.1 BTI(8m)	--	>10	0.00212	--	>10	>10	>10	>10	IGHV4-39	IGHJ4	IGKV1-33	IGKJ5	0.0305	0.028
BD57-0977	BA.1 BTI(8m)	--	>10	>10	--	>10	>10	>10	>10	IGHV4-61	IGHJ5	IGKV1-33	IGKJ4	0.0245	0.028
BD57-0978	BA.1 BTI(8m)	--	0.0244	0.0397	--	0.00327	>10	>10	>10	IGHV4-61	IGHJ4	IGKV1-33	IGKJ4	0.0632	0.0439
BD57-0979	BA.1 BTI(8m)	F3	>10	0.00146	--	0.00138	0.0388	0.0217	0.0174	IGHV3-15	IGHJ4	IGKV1-33	IGKJ5	0.0676	0.0372
BD57-0980	BA.1 BTI(8m)	--	0.0154	0.0149	--	>10	>10	>10	>10	IGHV4-61	IGHJ4	IGKV1-33	IGKJ4	0.0314	0.0188
BD57-0985	BA.1 BTI(8m)	--	>10	>10	--	>10	>10	>10	>10	IGHV3-23	IGHJ4	IGKV1-39	IGKJ2	0.0989	0.0769
BD57-0986	BA.1 BTI(8m)	--	<0.0005	<0.0005	--	>10	>10	>10	>10	IGHV3-48	IGHJ4	IGKV1-39	IGKJ1	0.0632	0.0497
BD57-0987	BA.1 BTI(8m)	--	>10	0.00186	--	>10	>10	>10	>10	IGHV1-8	IGHJ6	IGKV1-39	IGKJ4	0.0284	0.0155
BD57-0988	BA.1 BTI(8m)	--	0.585	0.00294	--	>10	>10	>10	>10	IGHV4-31	IGHJ5	IGKV1-39	IGKJ2	0.0396	0.0342
BD57-0990	BA.1 BTI(8m)	--	0.0490	0.00821	--	0.372	>10	>10	>10	IGHV1-69	IGHJ5	IGKV1-39	IGKJ3	0.0438	0.0342
BD57-0991	BA.1 BTI(8m)	--	>10	>10	--	>10	>10	>10	>10	IGHV3-13	IGHJ2	IGKV1-39	IGKJ2	0.0449	0.0615
BD57-0992	BA.1 BTI(8m)	--	0.00224	0.00198	--	0.000943	>10	0.0157	0.0221	IGHV3-33	IGHJ3	IGKV1-39	IGKJ2	0.0831	0.0839
BD57-0993	BA.1 BTI(8m)	--	>10	>10	--	>10	>10	>10	>10	IGHV3-13	IGHJ3	IGKV1-39	IGKJ2	0.0554	0.0492
BD57-0994	BA.1 BTI(8m)	--	0.0273	0.0142	--	0.347	>10	0.228	0.347	IGHV4-61	IGHJ4	IGKV1-33	IGKJ4	0.0785	0.0658
BD57-0995	BA.1 BTI(8m)	--	0.0224	0.0334	--	>10	>10	>10	>10	IGHV4-61	IGHJ4	IGKV1-33	IGKJ4	0.0524	0.0627
BD57-0998	BA.1 BTI(8m)	--	>10	0.612	--	>10	>10	>10	>10	IGHV1-69	IGHJ2	IGKV1-12	IGKJ4	0.0471	0.0277
BD57-0999	BA.1 BTI(8m)	--	0.00781	0.000900	--	0.000989	>10	0.158	0.384	IGHV3-53	IGHJ6	IGKV1D-12	IGKJ4	0.0402	0.0313
BD57-1001	BA.1 BTI(8m)	--	0.943	0.00233	--	4.58	>10	0.149	0.244	IGHV1-3	IGHJ4	IGKV1-5	IGKJ1	0.0471	0.0282
BD57-1002	BA.1 BTI(8m)	--	>10	0.00327	--	>10	>10	>10	>10	IGHV4-30-2	IGHJ4	IGKV1-5	IGKJ1	0.054	0.0462
BD57-1003	BA.1 BTI(8m)	--	>10	0.00106	--	>10	>10	>10	>10	IGHV4-39	IGHJ3	IGKV1-5	IGKJ2	0.062	0.0246
BD57-1004	BA.1 BTI(8m)	--	>10	0.000909	--	0.0172	>10	>10	>10	IGHV3-30	IGHJ4	IGKV1-5	IGKJ1	0.0269	0.0219
BD57-1005	BA.1 BTI(8m)	--	0.000725	0.000501	--	0.232	>10	>10	>10	IGHV1-69	IGHJ6	IGKV1-39	IGKJ1	0.096	0.0915
BD57-1006	BA.1 BTI(8m)	--	>10	0.00212	--	>10	>10	>10	>10	IGHV1-58	IGHJ4	IGKV2-28	IGKJ4	0.0366	0.015
BD57-1007	BA.1 BTI(8m)	--	>10	>10	--	>10	>10	>10	>10	IGHV4-59	IGHJ5	IGKV4-1	IGKJ4	0.0222	0.0176
BD57-1009	BA.1 BTI(8m)	--	>10	0.000693	--	0.0131	>10	>10	>10	IGHV4-59	IGHJ3	IGKV4-1	IGKJ4	0.0451	0.0176
BD57-1010	BA.1 BTI(8m)	--	0.00178	0.000946	--	0.000762	>10	0.00154	0.00144	IGHV3-74	IGHJ3	IGKV4-1	IGKJ2	0.0739	0.0355
BD57-1012	BA.1 BTI(8m)	--	0.00193	0.162	--	7.02	>10	>10	>10	IGHV1-46	IGHJ6	IGKV2-28	IGKJ4	0.032	0.0178
BD57-1017	BA.1 BTI(8m)	--	3.32	0.000887	--	2.37	>10	>10	>10	IGHV3-33	IGHJ6	IGKV2-29	IGKJ5	0.0344	0.0089
BD57-1020	BA.1 BTI(8m)	--	>10	0.00136	--	>10	>10	>10	>10	IGHV1-69	IGHJ4	IGKV2-29	IGKJ1	0.0398	0.0178
BD57-1021	BA.1 BTI(8m)	--	0.000820	0.000893	--	1.36	>10	>10	>10	IGHV4-30-2	IGHJ6	IGKV4-1	IGKJ4	0.0484	0.0559
BD57-1023	BA.1 BTI(8m)	--	0.00492	0.00416	--	>10	>10	>10	>10	IGHV1-18	IGHJ3	IGKV3-11	IGKJ4	0.0515	0.0308
BD57-1024	BA.1 BTI(8m)	--	0.306	0.677	--	>10	>10	>10	>10	IGHV1-18	IGHJ3	IGKV3-11	IGKJ2	0.0722	0.0251
BD57-1026	BA.1 BTI(8m)	--	2.47	0.760	--	>10	>10	>10	>10	IGHV1-18	IGHJ6	IGKV3-11	IGKJ1	0.056	0.0277
BD57-1028	BA.1 BTI(8m)	--	0.00621	0.00129	--	>10	>10	>10	>10	IGHV1-69	IGHJ3	IGKV3-20	IGKJ2	0.0366	0.0366
BD57-1031	BA.1 BTI(8m)	--	0.00108	0.000725	--	>10	>10	>10	>10	IGHV1-69	IGHJ4	IGKV3-20	IGKJ1	0.0703	0.04
BD57-1032	BA.1 BTI(8m)	--	>10	0.118	--	8.11	>10	>10	>10	IGHV3-7	IGHJ6	IGKV3-20	IGKJ1	0.0472	0.0277
BD57-1033	BA.1 BTI(8m)	--	0.00204	<0.0005	--	0.00174	0.127	>10	>10	IGHV1-58	IGHJ3	IGKV3-20	IGKJ4	0.0757	0.0677
BD57-1035	BA.1 BTI(8m)	A2	>10	0.000908	--	0.00355	0.0489	0.119	0.117	IGHV3-33	IGHJ4	IGKV3-20	IGKJ2	0.0914	0.0588
BD57-1037	BA.1 BTI(8m)	--	0.00399	0.00118	--	0.00327	0.344	>10	>10	IGHV3-53	IGHJ4	IGKV3-20	IGKJ1	0.0909	0.0769
BD57-1038	BA.1 BTI(8m)	--	<0.0005	<0.0005	--	1.77	>10	>10	>10	IGHV1-58	IGHJ3	IGKV3-20	IGKJ1	0.0405	0.0373
BD57-1039	BA.1 BTI(8m)	--	0.0114	0.0303	--	0.0500	>10	>10	>10	IGHV3-53	IGHJ6	IGKV3-20	IGKJ5	0.0452	0.0335
BD57-1040	BA.1 BTI(8m)	--	0.0609	6.61	--	5.24	>10	>10	>10	IGHV4-61	IGHJ4	IGKV3-20	IGKJ1	0.0468	0.0492
BD57-1041	BA.1 BTI(8m)	--	>10	1.04	--	0.00135	0.290	>10	>10	IGHV5-51	IGHJ4	IGKV3-20	IGKJ5	0.0322	0.0396
BD57-1042	BA.1 BTI(8m)	--	>10	0.000819	--	0.00499	0.356	>10	>10	IGHV5-51	IGHJ2	IGKV3-15	IGKJ1	0.0693	0.0248
BD57-1043	BA.1 BTI(8m)	--	>10	<0.0005	--	<0.0005	1.76	>10	>10	IGHV5-51	IGHJ3	IGKV3-15	IGKJ2	0.0704	0.0528
BD57-1044	BA.1 BTI(8m)	--	0.628	0.00204	--	>10	>10	>10	>10	IGHV5-51	IGHJ5	IGKV3-15	IGKJ2	0.0305	0.0342
BD57-1045	BA.1 BTI(8m)	--	0.00590	0.00227	--	<0.0005	0.0436	0.0587	0.0388	IGHV3-66	IGHJ6	IGKV3-20	IGKJ4	0.0593	0.0615
BD57-1046	BA.1 BTI(8m)	--	0.479	5.15	--	3.99	>10	>10	>10	IGHV3-9	IGHJ4	IGKV3-15	IGKJ1	0.0366	0.0313
BD57-1047	BA.1 BTI(8m)	--	>10	<0.0005	--	>10	>10	>10	>10	IGHV4-39	IGHJ4	IGKV1D-8	IGKJ2	0.0582	0.0497
BD57-1048	BA.1 BTI(8m)	--	0.0657	0.195	--	0.123	>10	>10	>10	IGHV1-46	IGHJ4	IGLV6-57	IGLJ3	0.0231	0.0061
BD57-1049	BA.1 BTI(8m)	--	0.204	>10	--	>10	>10	>10	>10	IGHV3-7	IGHJ4	IGLV6-57	IGLJ2	0.0447	0.024
BD57-1051	BA.1 BTI(8m)	--	0.356	>10	--	>10	>10	>10	>10	IGHV4-39	IGHJ4	IGLV6-57	IGLJ3	0.0332	0.015
BD57-1052	BA.1 BTI(8m)	--	0.00557	0.00356	--	>10	>10	>10	>10	IGHV5-10-1	IGHJ5	IGLV6-57	IGLJ3	0.0445	0.0272
BD57-1053	BA.1 BTI(8m)	--	>10	0.00291	--	>10	>10	>10	>10	IGHV3-21	IGHJ5	IGLV9-49	IGLJ3	0.0503	0.0431
BD57-1055	BA.1 BTI(8m)	--	0.434	3.11	--	3.72	>10	>10	>10	IGHV3-9	IGHJ6	IGLV1-47	IGLJ3	0.0499	0.0653
BD57-1056	BA.1 BTI(8m)	--	0.00142	0.000892	--	>10	>10	>10	>10	IGHV3-9	IGHJ4	IGLV9-49	IGLJ2	0.0736	0.0523
BD57-1057	BA.1 BTI(8m)	--	0.000619	<0.0005	--	0.00106	>10	>10	>10	IGHV2-5	IGHJ5	IGLV2-14	IGLJ2	0.0587	0.0644
BD57-1058	BA.1 BTI(8m)	--	0.000688	0.000607	--	0.00237	>10	>10	>10	IGHV2-5	IGHJ5	IGLV2-14	IGLJ2	0.0615	0.0826
BD57-1060	BA.1 BTI(8m)	--	0.00529	0.0129	--	0.141	>10	>10	>10	IGHV3-9	IGHJ3	IGLV2-14	IGLJ2	0.1	0.0699
BD57-1061	BA.1 BTI(8m)	B	0.00680	0.000625	--	0.0306	0.0969	>10	>10	IGHV1-69	IGHJ4	IGLV2-14	IGLJ1	0.0479	0.0331
BD57-1062	BA.1 BTI(8m)	--	>10	0.0134	--	1.04	>10	>10	>10	IGHV4-30-4	IGHJ4	IGLV2-23	IGLJ2	0.0324	0.0395
BD57-1064	BA.1 BTI(8m)	--	0.00189	<0.0005	--	0.311	0.648	>10	>10	IGHV3-23	IGHJ6	IGLV2-23	IGLJ3	0.0585	0.0302
BD57-1065	BA.1 BTI(8m)	--	0.0312	0.0619	--	2.33	>10	>10	>10	IGHV3-9	IGHJ6	IGLV2-14	IGLJ2	0.0238	0.0364
BD57-1069	BA.1 BTI(8m)	--	>10	0.00139	--	0.00654	1.37	>10	>10	IGHV2-5	IGHJ4	IGLV2-14	IGLJ3	0.0534	0.0613
BD57-1070	BA.1 BTI(8m)	--	>10	<0.0005	--	>10	>10	>10	>10	IGHV2-70	IGHJ4	IGLV2-14	IGLJ2	0.0378	0.0269
BD57-1071	BA.1 BTI(8m)	--	>10	0.0530	--	>10	>10	>10	>10	IGHV1-46	IGHJ4	IGLV2-11	IGLJ1	0	0
BD57-1072	BA.1 BTI(8m)	--	>10	0.00236	--	1.50	2.72	1.15	1.44	IGHV1-8	IGHJ6	IGLV2-11	IGLJ2	0.0105	0.0123
BD57-1073	BA.1 BTI(8m)	--	0.00113	<0.0005	--	0.00154	>10	>10	>10	IGHV2-5	IGHJ4	IGLV1-47	IGLJ3	0.0528	0.033
BD57-1075	BA.1 BTI(8m)	--	0.00131	0.00316	--	0.00186	>10	>10	>10	IGHV2-5	IGHJ4	IGLV1-47	IGLJ3	0.067	0.0634
BD57-1076	BA.1 BTI(8m)	--	0.000904	<0.0005	--	0.333	>10	>10	>10	IGHV4-30-4	IGHJ5	IGLV1-47	IGLJ2	0.0638	0.0488
BD57-1078	BA.1 BTI(8m)	--	>10	0.000539	--	0.219	7.11	>10	>10	IGHV3-30	IGHJ6	IGLV1-44	IGLJ2	0.132	0.0997
BD57-1079	BA.1 BTI(8m)	--	0.00839	0.270	--	0.210	>10	>10	>10	IGHV3-21	IGHJ6	IGLV1-44	IGLJ3	0.0513	0.0302
BD57-1080	BA.1 BTI(8m)	--	0.0365	0.00337	--	0.150	>10	0.342	1.34	IGHV3-9	IGHJ6	IGLV1-44	IGLJ1	0.0866	0.0331
BD57-1081	BA.1 BTI(8m)	--	>10	<0.0005	--	0.140	0.101	>10	>10	IGHV1-69	IGHJ4	IGLV1-44	IGLJ1	0.0436	0.0332
BD57-1082	BA.1 BTI(8m)	--	0.00493	<0.0005	--	7.02	>10	>10	>10	IGHV4-59	IGHJ5	IGLV1-44	IGLJ3	0.0829	0.0453
BD57-1083	BA.1 BTI(8m)	--	0.0155	0.00875	--	>10	>10	>10	>10	IGHV4-34	IGHJ3	IGLV1-44	IGLJ3	0.0619	0.0302
BD57-1086	BA.1 BTI(8m)	--	0.00134	1.25	--	>10	>10	>10	>10	IGHV3-23	IGHJ4	IGLV1-47	IGLJ3	0.0724	0.024
BD57-1087	BA.1 BTI(8m)	--	>10	<0.0005	--	0.0171	>10	>10	>10	IGHV5-51	IGHJ2	IGLV1-44	IGLJ3	0.0475	0.0299
BD57-1089	BA.1 BTI(8m)	--	>10	>10	--	>10	>10	>10	>10	IGHV1-46	IGHJ4	IGLV1-47	IGLJ3	0.0082	0.003
BD57-1090	BA.1 BTI(8m)	B	0.139	0.000511	--	0.00132	0.000947	0.993	0.559	IGHV1-24	IGHJ3	IGLV1-51	IGLJ3	0.0536	0.0393
BD57-1091	BA.1 BTI(8m)	--	0.437	>10	--	>10	>10	>10	>10	IGHV3-66	IGHJ5	IGLV1-51	IGLJ2	0.0191	0.003
BD57-1092	BA.1 BTI(8m)	--	>10	0.00162	--	>10	>10	>10	>10	IGHV1-2	IGHJ6	IGLV1-51	IGLJ3	0.0457	0.021
BD57-1094	BA.1 BTI(8m)	--	1.15	0.917	--	>10	>10	>10	>10	IGHV1-69	IGHJ2	IGLV1-40	IGLJ2	0.0353	0.0299
BD57-1095	BA.1 BTI(8m)	--	0.0382	0.0598	--	0.498	>10	>10	>10	IGHV1-69	IGHJ4	IGLV1-40	IGLJ1	0.079	0.024
BD57-1096	BA.1 BTI(8m)	--	>10	<0.0005	--	0.0680	>10	>10	>10	IGHV2-70	IGHJ3	IGLV1-40	IGLJ2	0.0275	0.0329
BD57-1097	BA.1 BTI(8m)	--	0.169	0.323	--	>10	>10	>10	>10	IGHV1-69	IGHJ2	IGLV1-40	IGLJ3	0.0362	0.021
BD57-1098	BA.1 BTI(8m)	--	0.623	0.870	--	>10	>10	>10	>10	IGHV1-69	IGHJ2	IGLV1-40	IGLJ1	0.0241	0.012
BD57-1099	BA.1 BTI(8m)	--	0.638	0.375	--	0.919	>10	>10	>10	IGHV1-69	IGHJ4	IGLV1-40	IGLJ2	0.0724	0.0269
BD57-1101	BA.1 BTI(8m)	--	0.273	0.270	--	0.331	>10	>10	>10	IGHV1-69	IGHJ4	IGLV1-40	IGLJ2	0.0643	0.0359
BD57-1102	BA.1 BTI(8m)	--	0.0846	0.367	--	2.24	>10	>10	>10	IGHV5-51	IGHJ5	IGLV1-40	IGLJ1	0.0364	0.018
BD57-1103	BA.1 BTI(8m)	--	>10	0.121	--	>10	>10	>10	>10	IGHV2-70	IGHJ3	IGLV1-40	IGLJ2	0.011	0.006
BD57-1104	BA.1 BTI(8m)	--	0.112	0.0905	--	0.250	>10	>10	>10	IGHV1-69	IGHJ2	IGLV1-40	IGLJ3	0.0617	0.0329
BD57-1105	BA.1 BTI(8m)	--	0.264	0.135	--	0.200	>10	>10	>10	IGHV1-69	IGHJ3	IGLV1-40	IGLJ1	0.0708	0.0389
BD57-1107	BA.1 BTI(8m)	--	>10	0.357	--	>10	>10	>10	>10	IGHV4-4	IGHJ6	IGLV3-19	IGLJ1	0.0831	0.0615
BD57-1109	BA.1 BTI(8m)	--	>10	0.0796	--	>10	>10	>10	>10	IGHV2-5	IGHJ5	IGLV3-1	IGLJ1	0.0349	0.0343
BD57-1111	BA.1 BTI(8m)	D3	>10	0.000655	--	0.00241	0.00590	>10	>10	IGHV2-70	IGHJ6	IGLV3-25	IGLJ3	0.0355	0.0549
BD57-1113	BA.1 BTI(8m)	--	>10	0.247	--	>10	0.00245	>10	>10	IGHV3-15	IGHJ4	IGLV3-10	IGLJ1	0.0052	0.0062
BD57-1118	BA.1 BTI(8m)	--	>10	<0.0005	--	>10	>10	>10	>10	IGHV1-69	IGHJ4	IGLV3-10	IGLJ1	0.0735	0.0305
BD57-1119	BA.1 BTI(8m)	--	>10	<0.0005	--	0.000734	0.000580	>10	>10	IGHV3-30	IGHJ4	IGLV3-25	IGLJ2	0.0691	0.0338
BD57-1123	BA.1 BTI(8m)	--	>10	>10	--	>10	>10	>10	>10	IGHV1-69	IGHJ5	IGLV3-1	IGLJ1	0.0647	0.0627
BD57-1124	BA.1 BTI(8m)	--	>10	>10	--	>10	>10	>10	>10	IGHV5-10-1	IGHJ6	IGLV3-1	IGLJ3	0.0465	0.0376
BD57-1125	BA.1 BTI(8m)	--	>10	<0.0005	--	<0.0005	0.0464	>10	>10	IGHV3-48	IGHJ4	IGLV3-25	IGLJ2	0.0554	0.0427
BD57-1126	BA.1 BTI(8m)	--	0.00552	0.00773	--	4.35	>10	>10	>10	IGHV3-9	IGHJ3	IGLV3-21	IGLJ2	0.0343	0.0279
BD57-1128	BA.1 BTI(8m)	B	0.00103	0.00102	--	0.00562	0.00641	0.967	2.31	IGHV1-69	IGHJ4	IGLV3-21	IGLJ3	0.0266	0.0308
BD57-1129	BA.1 BTI(8m)	--	>10	>10	--	>10	>10	>10	>10	IGHV4-31	IGHJ2	IGLV3-21	IGLJ3	0.0635	0.0554
BD57-1431	BA.1 BTI + BA.5/BF.7	F3	>10	0.000735	0.000537	<0.0005	0.00130	0.000740	0.000632	IGHV1-46	IGHJ4	IGKV1D-13	IGKJ5	0.0531	0.0369
BD57-1434	BA.1 BTI + BA.5/BF.7	F3	>10	0.00242	0.00724	0.00323	0.0122	0.0367	0.0263	IGHV4-59	IGHJ4	IGKV1D-13	IGKJ5	0.0578	0.0311
BD57-1437	BA.1 BTI + BA.5/BF.7	F3	>10	0.00236	0.00208	0.00489	0.0113	0.0236	0.0183	IGHV3-7	IGHJ3	IGKV1-13	IGKJ3	0.0349	0.0251
BD57-1443	BA.1 BTI + BA.5/BF.7	F1	0.110	0.464	>10	>10	>10	>10	>10	IGHV3-30	IGHJ4	IGKV1-8	IGKJ5	0.0412	0.0492
BD57-1463	BA.1 BTI + BA.5/BF.7	A1	0.0145	0.00275	0.00687	0.00643	0.0341	0.0308	0.0548	IGHV3-66	IGHJ6	IGKV1-9	IGKJ2	0.0484	0.0462
BD57-1464	BA.1 BTI + BA.5/BF.7	A1	0.0106	0.00240	0.00575	0.00407	0.0617	0.0646	0.0529	IGHV3-66	IGHJ4	IGKV1-9	IGKJ4	0.0767	0.0323
BD57-1465	BA.1 BTI + BA.5/BF.7	D2	>10	<0.0005	0.00911	0.0202	>10	0.0107	0.0134	IGHV1-24	IGHJ3	IGKV1-9	IGKJ4	0.0309	0.0437
BD57-1467	BA.1 BTI + BA.5/BF.7	A1	0.00374	0.00257	0.00174	0.00530	>10	>10	>10	IGHV3-53	IGHJ3	IGKV1-9	IGKJ3	0.0653	0.0154
BD57-1468	BA.1 BTI + BA.5/BF.7	A1	0.0213	0.00542	0.00209	0.0139	0.0444	0.0440	0.0303	IGHV3-53	IGHJ6	IGKV1-9	IGKJ5	0.08	0.0435
BD57-1474	BA.1 BTI + BA.5/BF.7	F3	>10	<0.0005	0.000767	0.000621	0.000734	0.000703	0.000943	IGHV3-30	IGHJ3	IGKV1-9	IGKJ4	0.0726	0.0312
BD57-1475	BA.1 BTI + BA.5/BF.7	A1	0.00149	0.00239	0.00282	0.00437	0.0733	0.0853	0.0824	IGHV3-66	IGHJ6	IGKV1-9	IGKJ3	0.0602	0.0433
BD57-1476	BA.1 BTI + BA.5/BF.7	A1	0.000768	0.0143	0.0179	0.00619	0.00649	0.0340	0.00670	IGHV4-4	IGHJ4	IGKV1-NL1	IGKJ2	0.0809	0.0404
BD57-1478	BA.1 BTI + BA.5/BF.7	D3	>10	0.0303	0.561	0.332	0.533	>10	>10	IGHV3-23	IGHJ6	IGKV1-9	IGKJ3	0.0407	0.0187
BD57-1480	BA.1 BTI + BA.5/BF.7	A1	0.00474	0.00250	0.00304	0.0112	0.0583	0.513	0.634	IGHV3-66	IGHJ6	IGKV1-9	IGKJ5	0.0855	0.0464
BD57-1485	BA.1 BTI + BA.5/BF.7	C/D1	>10	0.0342	0.000931	0.276	0.0610	0.0504	0.901	IGHV3-30	IGHJ3	IGKV1-5	IGKJ1	0.063	0.0652
BD57-1488	BA.1 BTI + BA.5/BF.7	F1	0.575	>10	>10	>10	>10	>10	>10	IGHV3-13	IGHJ2	IGKV1-39	IGKJ1	0.0409	0.04
BD57-1489	BA.1 BTI + BA.5/BF.7	F1	>10	>10	>10	>10	>10	>10	>10	IGHV3-13	IGHJ2	IGKV1-39	IGKJ2	0.0378	0.0615
BD57-1490	BA.1 BTI + BA.5/BF.7	D3	0.00121	0.0130	0.0535	0.0467	0.600	0.626	1.20	IGHV4-59	IGHJ5	IGKV1-33	IGKJ4	0.0459	0.059
BD57-1492	BA.1 BTI + BA.5/BF.7	A1	0.00199	0.00314	0.00327	0.00177	0.0119	0.0111	0.00557	IGHV3-53	IGHJ4	IGKV1-33	IGKJ5	0.0761	0.0373
BD57-1493	BA.1 BTI + BA.5/BF.7	F3	>10	0.00620	<0.0005	<0.0005	0.000860	0.00192	0.000737	IGHV3-43	IGHJ1	IGKV1-33	IGKJ3	0.0966	0.0745
BD57-1495	BA.1 BTI + BA.5/BF.7	F1	>10	>10	>10	>10	>10	>10	>10	IGHV3-13	IGHJ2	IGKV1-39	IGKJ2	0.0459	0.0466
BD57-1496	BA.1 BTI + BA.5/BF.7	A1	0.00326	0.0406	0.0113	0.0403	0.229	>10	>10	IGHV3-66	IGHJ4	IGKV1-39	IGKJ2	0.0507	0.0615
BD57-1498	BA.1 BTI + BA.5/BF.7	F3	>10	0.00106	0.000575	<0.0005	0.00118	0.00233	0.000526	IGHV3-43	IGHJ4	IGKV1-33	IGKJ3	0.0909	0.0923
BD57-1501	BA.1 BTI + BA.5/BF.7	A1	0.00152	0.00105	0.00134	0.00231	0.00544	0.0250	0.00913	IGHV4-39	IGHJ4	IGKV1-NL1	IGKJ2	0.0682	0.0615
BD57-1505	BA.1 BTI + BA.5/BF.7	F1	>10	>10	>10	>10	>10	>10	>10	IGHV3-30-3	IGHJ4	IGKV1-39	IGKJ4	0.0604	0.0338
BD57-1506	BA.1 BTI + BA.5/BF.7	--	0.251	0.683	0.0720	0.0152	0.0839	0.182	0.146	IGHV1-69	IGHJ5	IGKV1-39	IGKJ3	0.0958	0.0523
BD57-1507	BA.1 BTI + BA.5/BF.7	F1	>10	1.81	>10	>10	>10	>10	>10	IGHV3-13	IGHJ4	IGKV1-39	IGKJ1	0.0475	0.0492
BD57-1509	BA.1 BTI + BA.5/BF.7	D4	>10	<0.0005	0.0289	0.00611	0.204	<0.0005	<0.0005	IGHV7-4-1	IGHJ4	IGKV1-33	IGKJ5	0.0237	0.0373
BD57-1511	BA.1 BTI + BA.5/BF.7	--	>10	0.276	0.198	>10	>10	>10	>10	IGHV4-34	IGHJ5	IGKV1-39	IGKJ4	0.03	0.0373
BD57-1512	BA.1 BTI + BA.5/BF.7	A1	0.00343	0.00474	0.00946	0.0481	>10	>10	>10	IGHV1-18	IGHJ4	IGKV1-39	IGKJ1	0.0503	0.0373
BD57-1513	BA.1 BTI + BA.5/BF.7	A1	0.00192	0.00134	0.00161	0.000532	0.00653	0.00497	0.00239	IGHV4-39	IGHJ4	IGKV1-NL1	IGKJ4	0.0966	0.0677
BD57-1514	BA.1 BTI + BA.5/BF.7	F3	>10	0.000602	0.00425	<0.0005	0.00186	0.00695	0.00306	IGHV1-24	IGHJ4	IGKV1-33	IGKJ2	0.061	0.0621
BD57-1516	BA.1 BTI + BA.5/BF.7	C/D1	>10	0.00352	0.00718	0.00182	0.00946	>10	>10	IGHV7-4-1	IGHJ5	IGKV1-39	IGKJ3	0.0275	0.0369
BD57-1519	BA.1 BTI + BA.5/BF.7	A1	0.00328	0.00105	0.00180	0.00212	0.00649	0.0100	0.00186	IGHV3-53	IGHJ6	IGKV1-33	IGKJ1	0.0712	0.0528
BD57-1526	BA.1 BTI + BA.5/BF.7	A1	0.00264	0.0124	0.0150	0.0184	0.0406	0.00960	0.00827	IGHV3-30-3	IGHJ4	IGKV1-39	IGKJ3	0.0483	0.0404
BD57-1536	BA.1 BTI + BA.5/BF.7	F3	>10	0.00151	0.00907	0.00178	0.0104	0.00700	0.00525	IGHV4-39	IGHJ4	IGKV1-33	IGKJ4	0.0625	0.0404
BD57-1539	BA.1 BTI + BA.5/BF.7	A1	0.00344	0.00217	0.00270	0.00222	0.00857	0.00551	0.00321	IGHV3-66	IGHJ6	IGKV1-33	IGKJ4	0.0616	0.0404
BD57-1548	BA.1 BTI + BA.5/BF.7	A1	0.0131	0.00368	0.00202	0.00227	>10	>10	>10	IGHV3-53	IGHJ4	IGKV1-33	IGKJ4	0.0258	0.0155
BD57-1552	BA.1 BTI + BA.5/BF.7	A1	0.0116	0.00141	0.00102	0.000984	0.0145	0.307	0.0348	IGHV3-33	IGHJ6	IGKV1-39	IGKJ5	0.0336	0.0373
BD57-1555	BA.1 BTI + BA.5/BF.7	F1	>10	0.174	0.692	>10	>10	>10	>10	IGHV3-33	IGHJ4	IGKV1-39	IGKJ1	0.0609	0.0523
BD57-1557	BA.1 BTI + BA.5/BF.7	D4	>10	0.00148	0.000718	0.0207	0.156	>10	>10	IGHV3-30	IGHJ4	IGKV1-33	IGKJ5	0.0312	0.0311
BD57-1558	BA.1 BTI + BA.5/BF.7	A1	0.00548	0.0866	0.0665	0.0661	0.169	>10	>10	IGHV4-4	IGHJ4	IGKV1-NL1	IGKJ1	0.0287	0.0093
BD57-1561	BA.1 BTI + BA.5/BF.7	A1	0.00276	0.0100	0.0262	0.0393	0.0645	0.194	0.0884	IGHV4-59	IGHJ4	IGKV1-NL1	IGKJ2	0.052	0.0277
BD57-1562	BA.1 BTI + BA.5/BF.7	B	0.00269	<0.0005	<0.0005	0.00104	0.00860	0.262	0.0108	IGHV1-69	IGHJ4	IGKV1-NL1	IGKJ4	0.0536	0.0439
BD57-1566	BA.1 BTI + BA.5/BF.7	D4	>10	0.000620	0.00251	<0.0005	0.00385	0.00188	0.00202	IGHV3-30-3	IGHJ3	IGKV1-39	IGKJ4	0.0338	0.025
BD57-1569	BA.1 BTI + BA.5/BF.7	E2.2	0.112	0.178	0.0301	0.00637	0.0463	>10	>10	IGHV1-69	IGHJ4	IGKV1-39	IGKJ3	0.101	0.0492
BD57-1578	BA.1 BTI + BA.5/BF.7	F1	0.643	>10	>10	>10	>10	>10	>10	IGHV3-43	IGHJ4	IGKV1-39	IGKJ3	0.072	0.0431
BD57-1579	BA.1 BTI + BA.5/BF.7	F1	>10	>10	>10	>10	>10	>10	>10	IGHV3-13	IGHJ4	IGKV1-39	IGKJ1	0.0559	0.0402
BD57-1581	BA.1 BTI + BA.5/BF.7	F1	>10	>10	>10	>10	>10	>10	>10	IGHV3-13	IGHJ2	IGKV1-39	IGKJ5	0.0277	0.0308
BD57-1583	BA.1 BTI + BA.5/BF.7	F1	>10	0.728	0.744	>10	>10	>10	>10	IGHV3-13	IGHJ2	IGKV1-39	IGKJ4	0.0277	0.0215
BD57-1595	BA.1 BTI + BA.5/BF.7	F1	1.66	>10	>10	>10	>10	>10	>10	IGHV3-30	IGHJ4	IGKV1-39	IGKJ1	0.0632	0.0277
BD57-1596	BA.1 BTI + BA.5/BF.7	F1	1.10	>10	>10	>10	>10	>10	>10	IGHV3-30	IGHJ4	IGKV1-39	IGKJ4	0.0305	0.0215
BD57-1599	BA.1 BTI + BA.5/BF.7	F1	0.782	>10	>10	>10	>10	>10	>10	IGHV3-30-3	IGHJ4	IGKV1-39	IGKJ4	0.0467	0.0248
BD57-1601	BA.1 BTI + BA.5/BF.7	D4	>10	0.00209	0.0327	0.0512	0.0636	0.215	0.355	IGHV5-51	IGHJ6	IGKV1-39	IGKJ1	0.0108	0.0373
BD57-1607	BA.1 BTI + BA.5/BF.7	F1	1.15	>10	>10	>10	>10	>10	>10	IGHV3-13	IGHJ2	IGKV1-39	IGKJ4	0.0499	0.0985
BD57-1611	BA.1 BTI + BA.5/BF.7	F1	1.32	>10	>10	>10	>10	>10	>10	IGHV3-13	IGHJ2	IGKV1-39	IGKJ1	0.0381	0.04
BD57-1621	BA.1 BTI + BA.5/BF.7	A1	0.00233	0.00296	0.00126	0.00586	0.0152	0.0451	0.0202	IGHV4-39	IGHJ4	IGKV1-NL1	IGKJ4	0.0483	0.0277
BD57-1622	BA.1 BTI + BA.5/BF.7	F1	1.45	>10	>10	>10	>10	>10	>10	IGHV3-43	IGHJ4	IGKV1-39	IGKJ3	0.0803	0.0738
BD57-1624	BA.1 BTI + BA.5/BF.7	A1	0.00218	0.0170	0.0199	0.0295	0.0801	0.00778	0.00941	IGHV3-30-3	IGHJ4	IGKV1-39	IGKJ3	0.0625	0.0248
BD57-1627	BA.1 BTI + BA.5/BF.7	F1	>10	>10	>10	>10	>10	>10	>10	IGHV3-13	IGHJ2	IGKV1-39	IGKJ1	0.0654	0.0505
BD57-1630	BA.1 BTI + BA.5/BF.7	D3	>10	0.00433	0.0145	0.00980	0.0554	0.0254	0.0551	IGHV3-30-3	IGHJ6	IGKV1-12	IGKJ4	0.0523	0.0248
BD57-1633	BA.1 BTI + BA.5/BF.7	--	0.0188	0.232	0.334	>10	>10	>10	>10	IGHV3-7	IGHJ4	IGKV1-NL1	IGKJ1	0.0357	0.0308
BD57-1641	BA.1 BTI + BA.5/BF.7	D3	>10	0.0213	0.0157	0.0131	0.0310	0.0489	0.0463	IGHV4-39	IGHJ1	IGKV1-5	IGKJ2	0.0189	0.0125
BD57-1647	BA.1 BTI + BA.5/BF.7	F1	0.192	>10	>10	>10	>10	>10	>10	IGHV3-7	IGHJ4	IGKV1-5	IGKJ4	0.0442	0.0431
BD57-1648	BA.1 BTI + BA.5/BF.7	--	0.0880	0.740	1.40	0.503	>10	>10	1.66	IGHV3-7	IGHJ4	IGKV1-5	IGKJ4	0.0444	0.0338
BD57-1652	BA.1 BTI + BA.5/BF.7	A1	>10	0.0132	0.00666	0.0281	0.560	>10	>10	IGHV3-53	IGHJ3	IGKV1-33	IGKJ3	0.0559	0.0469
BD57-1653	BA.1 BTI + BA.5/BF.7	D3	>10	0.00269	0.00318	0.00231	0.161	>10	>10	IGHV5-51	IGHJ3	IGKV1-16	IGKJ5	0.0451	0.0217
BD57-1655	BA.1 BTI + BA.5/BF.7	D4	>10	0.00119	0.00763	0.00278	0.00622	0.610	0.427	IGHV5-51	IGHJ5	IGKV1-39	IGKJ1	0.0346	0.0417
BD57-1661	BA.1 BTI + BA.5/BF.7	D3	>10	0.0138	0.00933	0.0160	>10	>10	>10	IGHV5-51	IGHJ4	IGKV2-29	IGKJ4	0.0133	0.0176
BD57-1662	BA.1 BTI + BA.5/BF.7	D3	>10	<0.0005	0.000799	<0.0005	0.0762	>10	>10	IGHV5-51	IGHJ5	IGKV2-29	IGKJ3	0.0901	0.0386
BD57-1663	BA.1 BTI + BA.5/BF.7	D2	<0.0005	0.399	0.00232	<0.0005	>10	>10	>10	IGHV2-70	IGHJ4	IGKV2-29	IGKJ4	0.0471	0.0441
BD57-1664	BA.1 BTI + BA.5/BF.7	C/D1	0.883	<0.0005	<0.0005	0.0118	0.0317	>10	>10	IGHV1-69	IGHJ4	IGKV4-1	IGKJ2	0.0973	0.0588
BD57-1668	BA.1 BTI + BA.5/BF.7	A2	>10	0.00331	0.00812	0.0100	0.0932	0.293	0.316	IGHV3-30	IGHJ6	IGKV4-1	IGKJ2	0.065	0.0441
BD57-1669	BA.1 BTI + BA.5/BF.7	F3	>10	<0.0005	0.00827	0.0412	>10	>10	>10	IGHV4-4	IGHJ5	IGKV4-1	IGKJ4	0.0451	0.0147
BD57-1672	BA.1 BTI + BA.5/BF.7	A2	>10	0.00402	0.00472	0.0210	0.127	>10	0.274	IGHV3-30	IGHJ6	IGKV4-1	IGKJ2	0.0542	0.0324
BD57-1674	BA.1 BTI + BA.5/BF.7	F3	>10	0.000532	0.0107	0.0593	0.187	0.293	0.519	IGHV4-59	IGHJ4	IGKV4-1	IGKJ5	0.062	0.0294
BD57-1677	BA.1 BTI + BA.5/BF.7	F3	>10	0.000947	0.0453	0.240	0.335	>10	>10	IGHV4-59	IGHJ3	IGKV4-1	IGKJ4	0.0423	0.0206
BD57-1682	BA.1 BTI + BA.5/BF.7	D3	>10	0.0135	0.0351	0.0551	>10	>10	>10	IGHV5-51	IGHJ4	IGKV2-28	IGKJ1	0.0169	0.0237
BD57-1683	BA.1 BTI + BA.5/BF.7	D4	>10	<0.0005	0.00101	0.00174	0.00424	0.0390	0.0448	IGHV5-51	IGHJ6	IGKV2-28	IGKJ1	0.0442	0.0208
BD57-1684	BA.1 BTI + BA.5/BF.7	B	0.221	0.00509	0.0111	1.16	0.500	0.352	0.622	IGHV4-4	IGHJ6	IGKV2-28	IGKJ2	0.0251	0.0059
BD57-1685	BA.1 BTI + BA.5/BF.7	B	>10	<0.0005	0.000613	0.00796	0.00769	0.0138	0.00401	IGHV2-5	IGHJ5	IGKV2-28	IGKJ1	0.0358	0.003
BD57-1686	BA.1 BTI + BA.5/BF.7	B	1.33	0.000620	0.000999	0.0576	0.162	1.08	0.403	IGHV2-5	IGHJ6	IGKV2-28	IGKJ5	0.0075	0.009
BD57-1690	BA.1 BTI + BA.5/BF.7	B	>10	0.00338	0.00410	0.0141	0.00886	0.00923	0.00511	IGHV6-1	IGHJ6	IGKV2-28	IGKJ4	0.0498	0.0356
BD57-1691	BA.1 BTI + BA.5/BF.7	E1/E2.1	0.0256	0.00125	0.00175	0.108	>10	0.00503	0.00502	IGHV1-69-2	IGHJ6	IGKV2-28	IGKJ1	0.0495	0.0208
BD57-1693	BA.1 BTI + BA.5/BF.7	D3	>10	0.000997	0.00448	0.00226	>10	>10	>10	IGHV5-51	IGHJ4	IGKV2-29	IGKJ5	0.031	0.0387
BD57-1697	BA.1 BTI + BA.5/BF.7	D3	0.203	0.000759	0.000926	0.00108	>10	>10	>10	IGHV5-51	IGHJ5	IGKV2-29	IGKJ2	0.031	0.0237
BD57-1705	BA.1 BTI + BA.5/BF.7	D3	>10	0.00143	0.00364	0.00281	0.0116	0.978	0.597	IGHV5-51	IGHJ4	IGKV2-29	IGKJ4	0.0381	0.0357
BD57-1710	BA.1 BTI + BA.5/BF.7	D3	>10	<0.0005	<0.0005	<0.0005	0.0513	0.00501	0.00254	IGHV5-51	IGHJ3	IGKV2-30	IGKJ1	0.0422	0.0208
BD57-1711	BA.1 BTI + BA.5/BF.7	--	>10	>10	>10	>10	>10	>10	>10	IGHV1-18	IGHJ3	IGKV2-30	IGKJ1	0.0892	0.0476
BD57-1713	BA.1 BTI + BA.5/BF.7	E1/E2.1	0.00766	0.000937	0.000589	>10	>10	>10	>10	IGHV3-43	IGHJ6	IGKV2-30	IGKJ2	0.072	0.0359
BD57-1714	BA.1 BTI + BA.5/BF.7	D3	0.144	<0.0005	0.00138	0.00145	0.0306	>10	>10	IGHV5-51	IGHJ3	IGKV3D-20	IGKJ3	0.0366	0.0404
BD57-1715	BA.1 BTI + BA.5/BF.7	D3	0.0745	<0.0005	<0.0005	<0.0005	0.00183	0.0120	0.0217	IGHV5-51	IGHJ3	IGKV3D-20	IGKJ3	0.0394	0.0338
BD57-1716	BA.1 BTI + BA.5/BF.7	C/D1	0.00294	0.00203	0.00155	0.0678	0.0608	>10	>10	IGHV1-69	IGHJ4	IGKV3-20	IGKJ1	0.0811	0.0435
BD57-1718	BA.1 BTI + BA.5/BF.7	D3	>10	0.00187	0.000584	0.00271	0.359	2.37	3.72	IGHV5-51	IGHJ2	IGKV3-11	IGKJ1	0.0316	0.0186
BD57-1721	BA.1 BTI + BA.5/BF.7	B	0.00396	0.00148	0.00132	0.0111	0.0360	>10	>10	IGHV1-58	IGHJ3	IGKV3-20	IGKJ1	0.0528	0.0437
BD57-1723	BA.1 BTI + BA.5/BF.7	D3	>10	0.00156	0.00178	0.00122	0.0512	0.0521	0.0400	IGHV5-51	IGHJ4	IGKV3-20	IGKJ3	0.0343	0.0335
BD57-1725	BA.1 BTI + BA.5/BF.7	D2	0.00120	<0.0005	<0.0005	<0.0005	>10	>10	>10	IGHV2-70	IGHJ3	IGKV3-20	IGKJ1	0.0445	0.0492
BD57-1726	BA.1 BTI + BA.5/BF.7	A1	0.00441	0.00626	0.00848	0.00855	0.0243	0.0160	0.0214	IGHV3-66	IGHJ3	IGKV3-20	IGKJ5	0.0423	0.0435
BD57-1729	BA.1 BTI + BA.5/BF.7	C/D1	0.0157	0.0140	0.0161	0.0604	0.0332	2.36	0.198	IGHV3-7	IGHJ4	IGKV3-20	IGKJ1	0.0618	0.0276
BD57-1731	BA.1 BTI + BA.5/BF.7	D2	<0.0005	<0.0005	<0.0005	<0.0005	>10	>10	>10	IGHV2-70	IGHJ3	IGKV3-20	IGKJ1	0.0524	0.0492
BD57-1732	BA.1 BTI + BA.5/BF.7	A1	0.00314	0.00193	0.00135	0.00457	0.0326	0.0581	0.0517	IGHV3-66	IGHJ3	IGKV3-20	IGKJ5	0.0648	0.0404
BD57-1736	BA.1 BTI + BA.5/BF.7	D2	0.000837	<0.0005	<0.0005	<0.0005	0.0663	0.0545	0.0899	IGHV2-70	IGHJ3	IGKV3-20	IGKJ1	0.0602	0.0646
BD57-1737	BA.1 BTI + BA.5/BF.7	C/D1	0.00110	0.000920	0.00178	0.0979	0.0538	>10	>10	IGHV1-69	IGHJ4	IGKV3-20	IGKJ1	0.0757	0.0497
BD57-1744	BA.1 BTI + BA.5/BF.7	C/D1	0.00676	0.00624	0.00319	0.0577	0.0601	0.159	0.324	IGHV3-7	IGHJ4	IGKV3-20	IGKJ1	0.059	0.0213
BD57-1746	BA.1 BTI + BA.5/BF.7	A1	0.00387	0.00750	0.0117	0.00637	0.136	0.142	0.135	IGHV3-66	IGHJ4	IGKV3-20	IGKJ1	0.0398	0.0185
BD57-1747	BA.1 BTI + BA.5/BF.7	D4	>10	0.00657	0.0564	0.0522	0.110	3.29	2.38	IGHV5-51	IGHJ3	IGKV3-20	IGKJ1	0.0549	0.0311
BD57-1749	BA.1 BTI + BA.5/BF.7	D3	0.269	<0.0005	<0.0005	0.000550	0.00350	0.166	0.202	IGHV5-51	IGHJ4	IGKV3-20	IGKJ1	0.0479	0.0277
BD57-1750	BA.1 BTI + BA.5/BF.7	C/D1	0.000943	0.00104	<0.0005	0.115	0.164	>10	>10	IGHV1-69	IGHJ4	IGKV3-20	IGKJ1	0.0541	0.0246
BD57-1751	BA.1 BTI + BA.5/BF.7	D3	>10	<0.0005	0.00102	0.00118	<0.0005	>10	>10	IGHV5-51	IGHJ4	IGKV3-20	IGKJ4	0.0443	0.0338
BD57-1752	BA.1 BTI + BA.5/BF.7	A1	0.0221	0.0262	0.0275	0.458	>10	>10	>10	IGHV3-53	IGHJ4	IGKV3-20	IGKJ1	0.0338	0.0183
BD57-1754	BA.1 BTI + BA.5/BF.7	D4	>10	0.0151	0.181	0.116	0.125	>10	>10	IGHV5-51	IGHJ4	IGKV3-20	IGKJ1	0.0349	0.0492
BD57-1756	BA.1 BTI + BA.5/BF.7	B	0.00102	<0.0005	0.000622	0.0210	0.0139	>10	>10	IGHV1-58	IGHJ3	IGKV3-20	IGKJ1	0.0405	0.0369
BD57-1758	BA.1 BTI + BA.5/BF.7	D3	>10	0.000779	0.00867	0.00622	0.00987	>10	>10	IGHV5-51	IGHJ1	IGKV3-15	IGKJ1	0.0388	0.0431
BD57-1764	BA.1 BTI + BA.5/BF.7	D3	>10	0.000563	0.00232	0.000865	0.0656	>10	>10	IGHV5-51	IGHJ4	IGKV3-15	IGKJ4	0.0479	0.0062
BD57-1765	BA.1 BTI + BA.5/BF.7	D3	>10	<0.0005	0.000549	<0.0005	0.0755	2.12	2.75	IGHV5-51	IGHJ4	IGKV3-15	IGKJ4	0.0394	0.034
BD57-1766	BA.1 BTI + BA.5/BF.7	D3	>10	0.00153	0.0446	0.0395	0.273	>10	>10	IGHV5-51	IGHJ4	IGKV3-15	IGKJ1	0.0305	0.0154
BD57-1768	BA.1 BTI + BA.5/BF.7	D3	>10	0.00101	0.0215	0.0324	0.263	>10	>10	IGHV5-51	IGHJ3	IGKV3-15	IGKJ1	0.0391	0.0155
BD57-1770	BA.1 BTI + BA.5/BF.7	D2	0.0873	0.0385	0.00567	0.00432	>10	>10	>10	IGHV2-5	IGHJ4	IGKV3-15	IGKJ4	0.0165	0
BD57-1772	BA.1 BTI + BA.5/BF.7	A1	0.00581	0.0304	0.0314	0.0106	0.166	>10	0.321	IGHV3-53	IGHJ5	IGKV3-15	IGKJ2	0.036	0.0152
BD57-1773	BA.1 BTI + BA.5/BF.7	D3	>10	0.000762	0.0249	0.0244	0.0238	>10	>10	IGHV5-51	IGHJ4	IGKV3-15	IGKJ1	0.0328	0.0248
BD57-1775	BA.1 BTI + BA.5/BF.7	D3	>10	0.00147	0.00124	0.00148	0.104	>10	>10	IGHV5-51	IGHJ4	IGKV3-15	IGKJ2	0.0338	0.0092
BD57-1778	BA.1 BTI + BA.5/BF.7	D3	>10	0.000696	0.00486	0.00422	0.0354	>10	>10	IGHV5-51	IGHJ4	IGKV3-15	IGKJ1	0.0416	0.0462
BD57-1780	BA.1 BTI + BA.5/BF.7	D3	>10	0.000776	0.0524	0.0576	0.194	>10	>10	IGHV5-51	IGHJ4	IGKV3-15	IGKJ1	0.0166	0.0123
BD57-1783	BA.1 BTI + BA.5/BF.7	D3	>10	0.000724	0.000826	0.00114	0.173	>10	>10	IGHV5-51	IGHJ4	IGKV2-29	IGKJ2	0.0648	0.0297
BD57-1790	BA.1 BTI + BA.5/BF.7	D4	>10	0.00150	0.000685	0.000998	0.00331	0.0136	0.0118	IGHV5-51	IGHJ3	IGKV3-20	IGKJ1	0.0319	0.0246
BD57-1791	BA.1 BTI + BA.5/BF.7	D3	>10	<0.0005	<0.0005	<0.0005	0.0459	0.00753	0.0117	IGHV5-51	IGHJ3	IGKV3-15	IGKJ2	0.0519	0.0646
BD57-1792	BA.1 BTI + BA.5/BF.7	D3	0.707	<0.0005	0.000823	0.00142	0.0144	>10	>10	IGHV5-51	IGHJ3	IGKV3D-20	IGKJ2	0.0535	0.0518
BD57-1799	BA.1 BTI + BA.5/BF.7	C/D1	0.0502	<0.0005	<0.0005	0.00211	0.0227	>10	>10	IGHV1-69	IGHJ4	IGLV1-44	IGLJ3	0.0459	0.0423
BD57-1800	BA.1 BTI + BA.5/BF.7	F1	0.485	>10	>10	>10	>10	>10	>10	IGHV3-7	IGHJ5	IGLV6-57	IGLJ3	0.0475	0.0269
BD57-1801	BA.1 BTI + BA.5/BF.7	D3	>10	0.00150	0.00297	0.00136	0.0125	0.173	0.232	IGHV3-48	IGHJ4	IGLV6-57	IGLJ2	0.0324	0.0305
BD57-1803	BA.1 BTI + BA.5/BF.7	--	0.778	>10	>10	>10	>10	>10	>10	IGHV3-30-3	IGHJ6	IGLV6-57	IGLJ3	0.0761	0.0268
BD57-1806	BA.1 BTI + BA.5/BF.7	F1	0.448	>10	1.88	>10	>10	>10	>10	IGHV3-74	IGHJ4	IGLV6-57	IGLJ2	0.0451	0.0299
BD57-1825	BA.1 BTI + BA.5/BF.7	D2	>10	>10	>10	>10	>10	>10	>10	IGHV3-15	IGHJ4	IGLV7-46	IGLJ3	0.0401	0.0427
BD57-1833	BA.1 BTI + BA.5/BF.7	D2	0.00557	0.00142	0.00249	0.00284	0.208	>10	>10	IGHV2-5	IGHJ4	IGLV2-14	IGLJ2	0.0754	0.0734
BD57-1834	BA.1 BTI + BA.5/BF.7	--	>10	>10	>10	>10	>10	>10	>10	IGHV3-23	IGHJ6	IGLV2-14	IGLJ1	0.0842	0.0604
BD57-1835	BA.1 BTI + BA.5/BF.7	D2	<0.0005	0.00104	0.00196	0.000619	0.0741	>10	>10	IGHV2-5	IGHJ4	IGLV2-14	IGLJ3	0.0642	0.0305
BD57-1837	BA.1 BTI + BA.5/BF.7	D2	0.000636	0.00236	0.00448	0.00194	0.108	>10	>10	IGHV2-5	IGHJ4	IGLV2-14	IGLJ3	0.0447	0.0244
BD57-1838	BA.1 BTI + BA.5/BF.7	D2	0.000764	0.000996	0.00516	0.00217	0.116	>10	>10	IGHV2-5	IGHJ4	IGLV2-14	IGLJ3	0.0251	0.0734
BD57-1843	BA.1 BTI + BA.5/BF.7	A2	>10	0.00181	0.000954	0.0205	0.127	0.145	>10	IGHV6-1	IGHJ6	IGLV2-14	IGLJ2	0.0181	0.0151
BD57-1846	BA.1 BTI + BA.5/BF.7	D3	0.000570	0.00316	0.125	0.0278	0.0125	0.0189	0.0107	IGHV4-30-4	IGHJ4	IGLV2-14	IGLJ2	0.0934	0.0343
BD57-1847	BA.1 BTI + BA.5/BF.7	D2	0.0399	>10	0.0173	0.0184	>10	>10	>10	IGHV2-5	IGHJ5	IGLV2-14	IGLJ1	0.0412	0.0181
BD57-1848	BA.1 BTI + BA.5/BF.7	D3	0.0131	0.00203	0.0610	0.0127	0.0140	>10	>10	IGHV4-30-4	IGHJ4	IGLV2-14	IGLJ3	0.0577	0.0312
BD57-1849	BA.1 BTI + BA.5/BF.7	D2	0.00432	0.00792	0.00326	0.00118	0.119	>10	>10	IGHV3-43	IGHJ5	IGLV2-14	IGLJ1	0.0467	0.0302
BD57-1856	BA.1 BTI + BA.5/BF.7	D3	>10	0.00448	0.00573	0.00338	0.212	>10	>10	IGHV5-51	IGHJ6	IGLV2-14	IGLJ2	0.0157	0.0237
BD57-1857	BA.1 BTI + BA.5/BF.7	C/D1	0.00243	0.000690	<0.0005	0.0357	0.0502	0.0965	0.00430	IGHV1-46	IGHJ1	IGLV2-14	IGLJ1	0.0293	0.0302
BD57-1860	BA.1 BTI + BA.5/BF.7	F1	>10	>10	>10	>10	>10	>10	>10	IGHV1-18	IGHJ6	IGLV2-23	IGLJ2	0.0744	0.0329
BD57-1863	BA.1 BTI + BA.5/BF.7	D2	0.00129	0.00240	<0.0005	0.000569	0.346	>10	>10	IGHV3-30	IGHJ4	IGLV2-14	IGLJ2	0.0899	0.0636
BD57-1865	BA.1 BTI + BA.5/BF.7	D3	>10	<0.0005	0.00139	0.00134	0.0282	0.00123	0.00124	IGHV5-51	IGHJ4	IGLV2-23	IGLJ3	0.0426	0.0695
BD57-1867	BA.1 BTI + BA.5/BF.7	D4	>10	<0.0005	0.000950	0.0157	0.0225	0.00766	0.00740	IGHV4-38-2	IGHJ4	IGLV2-8	IGLJ2	0.0357	0.0246
BD57-1869	BA.1 BTI + BA.5/BF.7	D4	>10	0.000611	0.00234	0.00194	0.00223	0.00123	0.000739	IGHV4-39	IGHJ4	IGLV2-8	IGLJ3	0.0463	0.0369
BD57-1870	BA.1 BTI + BA.5/BF.7	D4	>10	0.000546	0.00128	<0.0005	0.00115	0.000523	<0.0005	IGHV4-38-2	IGHJ4	IGLV2-8	IGLJ2	0.044	0.0615
BD57-1873	BA.1 BTI + BA.5/BF.7	D4	>10	0.000985	0.00333	0.00230	0.00308	0.00323	0.00493	IGHV4-38-2	IGHJ4	IGLV2-8	IGLJ2	0.0302	0.0154
BD57-1874	BA.1 BTI + BA.5/BF.7	D4	>10	<0.0005	<0.0005	0.00284	0.0130	0.00821	0.00810	IGHV4-38-2	IGHJ4	IGLV2-8	IGLJ2	0.0412	0.0092
BD57-1876	BA.1 BTI + BA.5/BF.7	D4	>10	<0.0005	0.000874	0.00126	0.00277	0.000831	<0.0005	IGHV5-51	IGHJ3	IGLV2-8	IGLJ3	0.0935	0.0738
BD57-1877	BA.1 BTI + BA.5/BF.7	D4	>10	<0.0005	0.00136	0.00432	0.00866	0.00193	0.00398	IGHV5-51	IGHJ3	IGLV2-8	IGLJ3	0.0883	0.0646
BD57-1879	BA.1 BTI + BA.5/BF.7	A1	0.00302	0.00583	0.00929	0.00737	0.0152	0.0675	0.0599	IGHV3-23	IGHJ5	IGLV1-40	IGLJ1	0.0627	0.024
BD57-1880	BA.1 BTI + BA.5/BF.7	D4	>10	<0.0005	0.00228	<0.0005	0.000757	<0.0005	<0.0005	IGHV4-38-2	IGHJ4	IGLV2-8	IGLJ2	0.0549	0.0372
BD57-1881	BA.1 BTI + BA.5/BF.7	D4	>10	<0.0005	0.00137	0.000978	0.00169	0.000782	<0.0005	IGHV4-38-2	IGHJ4	IGLV2-8	IGLJ2	0.0577	0.0557
BD57-1882	BA.1 BTI + BA.5/BF.7	D4	>10	0.000733	0.00280	<0.0005	0.00210	0.00214	0.000947	IGHV7-4-1	IGHJ4	IGLV2-11	IGLJ3	0.0243	0.0494
BD57-1884	BA.1 BTI + BA.5/BF.7	D4	>10	0.000637	0.00117	<0.0005	0.00179	0.00161	0.000782	IGHV4-39	IGHJ1	IGLV2-11	IGLJ2	0.0528	0.0492
BD57-1888	BA.1 BTI + BA.5/BF.7	B	>10	0.00268	0.0134	0.0697	0.0348	>10	>10	IGHV1-46	IGHJ4	IGLV2-11	IGLJ1	0.0585	0.0364
BD57-1890	BA.1 BTI + BA.5/BF.7	D2	0.00136	0.000642	0.00168	0.000635	0.0192	0.0491	0.0210	IGHV2-5	IGHJ4	IGLV2-14	IGLJ2	0.106	0.0879
BD57-1897	BA.1 BTI + BA.5/BF.7	E1/E2.1	0.0109	0.0366	0.0334	0.0732	>10	0.267	0.604	IGHV3-9	IGHJ6	IGLV1-44	IGLJ1	0.0469	0.018
BD57-1898	BA.1 BTI + BA.5/BF.7	D4	0.891	<0.0005	0.00281	<0.0005	0.00246	0.00110	<0.0005	IGHV1-69	IGHJ4	IGLV1-44	IGLJ3	0.0509	0.0272
BD57-1900	BA.1 BTI + BA.5/BF.7	D4	>10	0.000651	0.00171	<0.0005	0.00800	0.000948	<0.0005	IGHV2-70	IGHJ4	IGLV1-44	IGLJ3	0.0239	0.0212
BD57-1901	BA.1 BTI + BA.5/BF.7	D4	>10	0.000549	0.0153	0.00733	0.0173	0.0120	0.00509	IGHV4-39	IGHJ4	IGLV1-44	IGLJ1	0.0297	0.0151
BD57-1916	BA.1 BTI + BA.5/BF.7	E1/E2.1	0.0454	0.310	0.0468	0.0563	>10	0.273	0.212	IGHV4-31	IGHJ4	IGLV1-40	IGLJ1	0.0447	0.0237
BD57-1917	BA.1 BTI + BA.5/BF.7	--	0.373	0.501	0.404	0.194	>10	>10	>10	IGHV3-9	IGHJ3	IGLV1-44	IGLJ3	0.0412	0.0423
BD57-1919	BA.1 BTI + BA.5/BF.7	D3	>10	0.00157	0.0199	0.0170	>10	>10	>10	IGHV5-51	IGHJ3	IGLV1-51	IGLJ1	0.0392	0.0242
BD57-1920	BA.1 BTI + BA.5/BF.7	D3	>10	0.00210	0.00622	0.00447	0.798	>10	>10	IGHV5-51	IGHJ4	IGLV1-51	IGLJ2	0.0243	0.0242
BD57-1921	BA.1 BTI + BA.5/BF.7	E1/E2.1	0.0172	0.0206	0.00337	>10	>10	>10	>10	IGHV3-11	IGHJ2	IGLV1-51	IGLJ2	0.0931	0.0701
BD57-1922	BA.1 BTI + BA.5/BF.7	C/D1	0.0248	<0.0005	<0.0005	0.0234	0.0341	0.0770	>10	IGHV1-46	IGHJ4	IGLV1-51	IGLJ3	0.0456	0.0422
BD57-1924	BA.1 BTI + BA.5/BF.7	E2.2	0.0692	0.115	0.0750	>10	>10	>10	>10	IGHV3-9	IGHJ6	IGLV1-51	IGLJ2	0.0646	0.0211
BD57-1927	BA.1 BTI + BA.5/BF.7	D4	>10	<0.0005	<0.0005	<0.0005	0.00122	0.00200	0.000847	IGHV3-23	IGHJ4	IGLV1-51	IGLJ3	0.0327	0.0274
BD57-1929	BA.1 BTI + BA.5/BF.7	A1	0.000638	<0.0005	<0.0005	0.000623	0.00179	0.00151	0.000901	IGHV4-59	IGHJ5	IGLV1-51	IGLJ2	0.0549	0.0394
BD57-1931	BA.1 BTI + BA.5/BF.7	D2	0.000669	0.0244	<0.0005	<0.0005	>10	>10	>10	IGHV2-70	IGHJ4	IGLV1-51	IGLJ2	0.0409	0.0242
BD57-1935	BA.1 BTI + BA.5/BF.7	E2.2	0.247	0.198	0.0432	>10	>10	>10	>10	IGHV1-69	IGHJ2	IGLV1-40	IGLJ2	0.0665	0.0419
BD57-1936	BA.1 BTI + BA.5/BF.7	D3	0.339	0.000600	<0.0005	0.000591	0.0948	0.0373	0.0497	IGHV5-51	IGHJ4	IGLV1-51	IGLJ2	0.0559	0.0629
BD57-1937	BA.1 BTI + BA.5/BF.7	C/D1	1.93	0.000587	<0.0005	0.0272	0.0166	0.0155	0.00779	IGHV1-69	IGHJ4	IGLV1-36	IGLJ3	0.0609	0.0121
BD57-1942	BA.1 BTI + BA.5/BF.7	D2	0.00105	0.0195	0.0258	0.0150	>10	>10	>10	IGHV2-5	IGHJ6	IGLV1-40	IGLJ3	0.0457	0.0687
BD57-1944	BA.1 BTI + BA.5/BF.7	E2.2	0.251	0.340	0.0540	>10	>10	>10	>10	IGHV1-69	IGHJ2	IGLV1-40	IGLJ3	0.0443	0.024
BD57-1946	BA.1 BTI + BA.5/BF.7	D3	0.00158	0.00187	0.00474	0.00233	0.0101	0.666	0.904	IGHV1-46	IGHJ4	IGLV1-40	IGLJ1	0.0681	0.0382
BD57-1948	BA.1 BTI + BA.5/BF.7	D3	0.0164	0.00881	0.0176	0.0100	0.0970	1.18	2.31	IGHV1-46	IGHJ4	IGLV1-40	IGLJ1	0.0736	0.0147
BD57-1950	BA.1 BTI + BA.5/BF.7	A2	0.00298	0.00309	0.00497	0.00221	0.0170	0.0348	0.0132	IGHV4-59	IGHJ5	IGLV1-40	IGLJ2	0.0332	0.0178
BD57-1951	BA.1 BTI + BA.5/BF.7	C/D1	>10	0.000515	<0.0005	<0.0005	0.00260	0.0410	>10	IGHV1-24	IGHJ6	IGLV1-40	IGLJ2	0.0181	0.0088
BD57-1952	BA.1 BTI + BA.5/BF.7	--	0.0891	0.0404	0.0378	0.0434	0.160	0.439	0.333	IGHV1-46	IGHJ4	IGLV1-40	IGLJ2	0.0873	0.0415
BD57-1953	BA.1 BTI + BA.5/BF.7	E1/E2.1	0.0971	0.0184	0.0320	0.0243	0.140	6.50	7.23	IGHV1-46	IGHJ4	IGLV1-40	IGLJ2	0.0897	0.0237
BD57-1954	BA.1 BTI + BA.5/BF.7	F1	>10	>10	>10	>10	>10	>10	>10	IGHV1-18	IGHJ6	IGLV1-40	IGLJ3	0.0641	0.0572
BD57-1956	BA.1 BTI + BA.5/BF.7	F1	>10	>10	>10	>10	>10	>10	>10	IGHV3-23	IGHJ1	IGLV1-40	IGLJ3	0.0773	0.0392
BD57-1964	BA.1 BTI + BA.5/BF.7	F1	>10	>10	>10	>10	>10	>10	>10	IGHV2-5	IGHJ5	IGLV3-25	IGLJ1	0.0442	0.0533
BD57-1965	BA.1 BTI + BA.5/BF.7	D3	>10	0.000924	<0.0005	0.000788	0.00252	0.0102	0.0194	IGHV2-70	IGHJ4	IGLV3-25	IGLJ2	0.049	0.061
BD57-1966	BA.1 BTI + BA.5/BF.7	D3	>10	0.000983	0.00305	0.00166	0.0208	0.216	0.391	IGHV2-70	IGHJ6	IGLV3-25	IGLJ3	0.0271	0.0549
BD57-1967	BA.1 BTI + BA.5/BF.7	D3	>10	0.000816	0.000810	0.000597	0.00230	0.00561	0.00137	IGHV2-70	IGHJ6	IGLV3-25	IGLJ3	0.0437	0.0769
BD57-1973	BA.1 BTI + BA.5/BF.7	D3	>10	0.00107	0.0269	0.0189	0.0821	0.0372	0.0569	IGHV2-70	IGHJ6	IGLV3-25	IGLJ3	0.0273	0.0369
BD57-1974	BA.1 BTI + BA.5/BF.7	D3	>10	<0.0005	<0.0005	<0.0005	0.000687	0.0206	0.0378	IGHV2-70	IGHJ4	IGLV3-25	IGLJ2	0.0163	0.0215
BD57-1975	BA.1 BTI + BA.5/BF.7	D4	>10	0.00125	0.000661	0.00602	0.0186	0.0251	0.0171	IGHV3-23	IGHJ4	IGLV3-9	IGLJ1	0.0249	0.0253
BD57-1976	BA.1 BTI + BA.5/BF.7	A1	0.00370	0.00592	0.00388	0.00314	0.0102	0.0111	0.00446	IGHV3-66	IGHJ6	IGLV3-9	IGLJ2	0.0452	0.0376
BD57-1979	BA.1 BTI + BA.5/BF.7	D3	>10	0.000572	<0.0005	<0.0005	0.0288	0.0182	0.0294	IGHV2-70	IGHJ4	IGLV3-25	IGLJ2	0.0189	0.031
BD57-1982	BA.1 BTI + BA.5/BF.7	D3	>10	<0.0005	<0.0005	0.000598	0.00362	0.00423	0.00667	IGHV3-7	IGHJ4	IGLV3-25	IGLJ3	0.0463	0.0366
BD57-1985	BA.1 BTI + BA.5/BF.7	D3	>10	0.00209	0.00777	0.00697	0.0433	0.0110	0.0200	IGHV2-70	IGHJ6	IGLV3-25	IGLJ2	0.0273	0.0523
BD57-1990	BA.1 BTI + BA.5/BF.7	D3	>10	<0.0005	<0.0005	<0.0005	0.000529	0.0260	0.0252	IGHV2-70	IGHJ4	IGLV3-25	IGLJ3	0.0518	0.0431
BD57-1991	BA.1 BTI + BA.5/BF.7	D3	>10	0.000993	0.00174	0.00246	0.00816	0.00457	0.00619	IGHV2-70	IGHJ4	IGLV3-25	IGLJ2	0.0322	0.037
BD57-1996	BA.1 BTI + BA.5/BF.7	D3	>10	0.000690	0.0158	0.00360	0.0336	>10	>10	IGHV4-39	IGHJ4	IGLV3-25	IGLJ2	0.0521	0.0338
BD57-1997	BA.1 BTI + BA.5/BF.7	D3	>10	0.00188	<0.0005	<0.0005	0.00139	0.00183	0.00456	IGHV2-70	IGHJ6	IGLV3-25	IGLJ2	0.0248	0.0431
BD57-1998	BA.1 BTI + BA.5/BF.7	D3	>10	<0.0005	<0.0005	<0.0005	0.000906	0.0149	0.0369	IGHV2-70	IGHJ4	IGLV3-25	IGLJ2	0.0054	0.0062
BD57-2002	BA.1 BTI + BA.5/BF.7	D3	>10	0.000609	<0.0005	0.00115	0.00106	0.0173	0.0265	IGHV2-70	IGHJ4	IGLV3-25	IGLJ2	0.03	0.0369
BD57-2003	BA.1 BTI + BA.5/BF.7	D3	>10	0.00152	0.000789	0.00275	0.00393	0.0228	0.0513	IGHV2-70	IGHJ4	IGLV3-25	IGLJ2	0.0191	0.0215
BD57-2005	BA.1 BTI + BA.5/BF.7	D3	>10	<0.0005	<0.0005	0.000502	<0.0005	0.00367	0.00549	IGHV2-70	IGHJ4	IGLV3-25	IGLJ2	0.0136	0.0335
BD57-2011	BA.1 BTI + BA.5/BF.7	D3	>10	0.000819	0.000901	0.00119	0.00256	0.00428	0.00247	IGHV2-70	IGHJ6	IGLV3-25	IGLJ3	0.0301	0.0396
BD57-2013	BA.1 BTI + BA.5/BF.7	D3	>10	0.000513	0.000994	0.000672	0.000714	0.00232	0.00136	IGHV3-7	IGHJ6	IGLV3-25	IGLJ1	0.048	0.0274
BD57-2016	BA.1 BTI + BA.5/BF.7	D3	>10	0.000609	<0.0005	0.000538	0.00158	0.0188	0.0101	IGHV2-70	IGHJ4	IGLV3-25	IGLJ2	0.0272	0.04
BD57-2017	BA.1 BTI + BA.5/BF.7	D3	>10	0.000780	0.00113	0.00162	0.00420	0.00551	0.00376	IGHV2-70	IGHJ6	IGLV3-25	IGLJ2	0.04	0.0214
BD57-2023	BA.1 BTI + BA.5/BF.7	D3	>10	<0.0005	<0.0005	0.000734	0.00884	0.0212	0.0173	IGHV2-70	IGHJ5	IGLV3-25	IGLJ2	0.0378	0.0398
BD57-2028	BA.1 BTI + BA.5/BF.7	D3	>10	<0.0005	<0.0005	0.000716	0.00246	0.0333	0.0176	IGHV2-70	IGHJ4	IGLV3-25	IGLJ2	0.0218	0.046
BD57-2031	BA.1 BTI + BA.5/BF.7	D3	>10	<0.0005	0.00130	0.0160	0.00812	0.0337	0.0343	IGHV2-70	IGHJ6	IGLV3-25	IGLJ3	0.0219	0.0404
BD57-2034	BA.1 BTI + BA.5/BF.7	D3	2.37	0.000734	<0.0005	0.000958	0.00404	0.00175	0.00112	IGHV3-7	IGHJ4	IGLV3-25	IGLJ3	0.0572	0.0343
BD57-2039	BA.1 BTI + BA.5/BF.7	F3	>10	0.000687	<0.0005	0.000735	0.00110	0.00181	0.00114	IGHV7-4-1	IGHJ3	IGLV3-21	IGLJ2	0.0335	0.013
BD57-2052	BA.1 BTI + BA.5/BF.7	F1	0.352	>10	>10	>10	>10	>10	>10	IGHV3-7	IGHJ4	IGLV3-21	IGLJ2	0.0305	0.0492
BD57-2054	BA.1 BTI + BA.5/BF.7	F1	>10	>10	>10	>10	>10	>10	>10	IGHV3-30	IGHJ5	IGLV3-21	IGLJ1	0.0745	0.0215
BD57-2056	BA.1 BTI + BA.5/BF.7	F1	0.114	0.0380	0.0416	>10	>10	>10	>10	IGHV3-30	IGHJ5	IGLV3-21	IGLJ1	0.0691	0.031
BD57-2057	BA.1 BTI + BA.5/BF.7	F1	1.04	>10	>10	>10	>10	>10	>10	IGHV3-30	IGHJ5	IGLV3-21	IGLJ1	0.0665	0.0248
BD57-2059	BA.1 BTI + BA.5/BF.7	F1	1.04	>10	>10	>10	>10	>10	>10	IGHV3-30	IGHJ5	IGLV3-21	IGLJ1	0.0745	0.0246
BD57-1430	BA.2 BTI + BA.5/BF.7	F3	>10	0.0205	0.00899	0.00828	0.0404	0.0386	0.0440	IGHV4-31	IGHJ3	IGKV1-13	IGKJ2	0.0475	0.028
BD57-1432	BA.2 BTI + BA.5/BF.7	D3	0.0219	0.000705	<0.0005	<0.0005	0.0602	0.0294	0.0471	IGHV5-51	IGHJ4	IGKV1-13	IGKJ2	0.0416	0.0375
BD57-1433	BA.2 BTI + BA.5/BF.7	F3	>10	2.15	0.0139	0.0142	0.0946	0.0690	0.0737	IGHV3-7	IGHJ4	IGKV1-13	IGKJ1	0.0268	0.028
BD57-1435	BA.2 BTI + BA.5/BF.7	F3	>10	0.0212	0.00887	0.00670	0.0399	0.0403	0.0526	IGHV4-30-4	IGHJ3	IGKV1D-13	IGKJ3	0.0475	0.0217
BD57-1436	BA.2 BTI + BA.5/BF.7	F3	>10	0.00207	0.000540	0.000679	0.00424	0.00613	0.00395	IGHV3-23	IGHJ4	IGKV1D-13	IGKJ4	0.0363	0.0062
BD57-1439	BA.2 BTI + BA.5/BF.7	F3	>10	0.313	0.00609	0.00478	0.0299	0.0262	0.0252	IGHV3-7	IGHJ3	IGKV1-13	IGKJ2	0.034	0.0248
BD57-1440	BA.2 BTI + BA.5/BF.7	F3	>10	>10	0.0367	0.0207	0.0753	0.0474	0.0646	IGHV4-59	IGHJ3	IGKV1-13	IGKJ1	0.0398	0.0186
BD57-1441	BA.2 BTI + BA.5/BF.7	F3	>10	0.00419	0.000815	0.000675	0.00394	0.00326	0.00138	IGHV3-11	IGHJ4	IGKV1D-13	IGKJ1	0.0578	0.047
BD57-1442	BA.2 BTI + BA.5/BF.7	F3	>10	0.0687	0.00664	0.00896	0.0352	0.0296	0.0245	IGHV3-11	IGHJ3	IGKV1-13	IGKJ5	0.0338	0.0158
BD57-1444	BA.2 BTI + BA.5/BF.7	D2	0.00430	0.312	0.00463	0.00117	>10	>10	>10	IGHV2-5	IGHJ4	IGKV1D-13	IGKJ4	0.0763	0.0502
BD57-1445	BA.2 BTI + BA.5/BF.7	F3	>10	>10	<0.0005	<0.0005	0.00119	0.00262	0.00581	IGHV5-51	IGHJ4	IGKV1-39	IGKJ2	0.0486	0.0439
BD57-1446	BA.2 BTI + BA.5/BF.7	F3	>10	>10	0.00122	0.00138	0.00578	0.00869	0.00642	IGHV5-51	IGHJ5	IGKV1-39	IGKJ2	0.0595	0.059
BD57-1447	BA.2 BTI + BA.5/BF.7	F1	>10	>10	>10	>10	>10	>10	>10	IGHV3-13	IGHJ6	IGKV1-39	IGKJ2	0.0354	0.0402
BD57-1448	BA.2 BTI + BA.5/BF.7	F3	>10	>10	0.00702	0.0176	0.0752	0.0922	0.124	IGHV5-51	IGHJ4	IGKV1-39	IGKJ2	0.0305	0.0462
BD57-1449	BA.2 BTI + BA.5/BF.7	F3	>10	0.215	0.00302	0.00199	0.00298	0.00299	0.00143	IGHV5-51	IGHJ6	IGKV1-39	IGKJ2	0.0392	0.0124
BD57-1450	BA.2 BTI + BA.5/BF.7	F3	>10	>10	0.00653	0.00915	0.0168	0.0419	0.0717	IGHV5-51	IGHJ4	IGKV1-39	IGKJ2	0.0444	0.0124
BD57-1451	BA.2 BTI + BA.5/BF.7	F3	>10	0.0187	0.0143	0.00943	0.0165	0.0553	0.0660	IGHV5-51	IGHJ4	IGKV1-39	IGKJ4	0.0375	0.0492
BD57-1452	BA.2 BTI + BA.5/BF.7	F3	>10	>10	0.00186	0.000729	0.00297	0.00330	0.00173	IGHV5-51	IGHJ4	IGKV1-39	IGKJ2	0.036	0.04
BD57-1453	BA.2 BTI + BA.5/BF.7	F3	>10	>10	0.00295	0.000543	0.00250	0.00297	0.00270	IGHV5-51	IGHJ4	IGKV1-39	IGKJ2	0.0277	0.0338
BD57-1454	BA.2 BTI + BA.5/BF.7	--	>10	0.181	0.00399	0.00221	0.00813	0.00407	0.00255	IGHV5-51	IGHJ4	IGKV1-39	IGKJ2	0.0429	0.0497
BD57-1455	BA.2 BTI + BA.5/BF.7	F3	>10	1.22	0.00523	0.00180	0.00713	0.0103	0.00508	IGHV5-51	IGHJ3	IGKV1-39	IGKJ1	0.0405	0.0124
BD57-1456	BA.2 BTI + BA.5/BF.7	F3	>10	0.551	0.00362	0.00410	0.00688	0.00211	0.00157	IGHV5-51	IGHJ4	IGKV1-39	IGKJ2	0.0279	0.0093
BD57-1457	BA.2 BTI + BA.5/BF.7	F3	>10	>10	0.00117	<0.0005	0.00297	0.00156	0.000659	IGHV5-51	IGHJ5	IGKV1-39	IGKJ2	0.0514	0.0124
BD57-1459	BA.2 BTI + BA.5/BF.7	E1/E2.1	0.00287	0.00793	0.00528	0.000698	>10	>10	>10	IGHV3-33	IGHJ3	IGKV1-39	IGKJ2	0.0452	0.0277
BD57-1460	BA.2 BTI + BA.5/BF.7	F1	0.836	>10	>10	>10	>10	>10	>10	IGHV3-43	IGHJ5	IGKV1-39	IGKJ2	0.0627	0.0646
BD57-1461	BA.2 BTI + BA.5/BF.7	F1	0.995	0.742	0.158	0.198	>10	>10	>10	IGHV3-30	IGHJ5	IGKV1-39	IGKJ1	0.0499	0.0369
BD57-1462	BA.2 BTI + BA.5/BF.7	D3	>10	0.0694	0.00326	0.00426	0.0145	>10	>10	IGHV5-51	IGHJ4	IGKV1-39	IGKJ1	0.0479	0.0683
BD57-1466	BA.2 BTI + BA.5/BF.7	A1	0.00314	0.00111	0.00258	0.00122	0.0191	0.0290	0.00849	IGHV3-53	IGHJ6	IGKV1-9	IGKJ5	0.0819	0.0188
BD57-1469	BA.2 BTI + BA.5/BF.7	F3	>10	0.0181	0.00385	0.00107	0.00553	0.00263	0.00294	IGHV5-51	IGHJ5	IGKV1-39	IGKJ2	0.0503	0.0311
BD57-1470	BA.2 BTI + BA.5/BF.7	A1	0.000567	<0.0005	0.00283	<0.0005	0.00433	0.00478	0.00125	IGHV3-53	IGHJ4	IGKV1-33	IGKJ1	0.0802	0.0497
BD57-1472	BA.2 BTI + BA.5/BF.7	A1	<0.0005	<0.0005	0.000693	0.00195	0.00503	0.528	0.00178	IGHV1-18	IGHJ4	IGKV1-33	IGKJ5	0.0909	0.0559
BD57-1473	BA.2 BTI + BA.5/BF.7	E1/E2.1	0.261	0.0850	0.0899	0.423	>10	0.377	0.502	IGHV1-69	IGHJ6	IGKV1-39	IGKJ1	0.0441	0.047
BD57-1479	BA.2 BTI + BA.5/BF.7	A2	0.203	0.00109	0.00489	0.00230	0.00697	0.00652	0.00140	IGHV3-9	IGHJ6	IGKV1-9	IGKJ2	0.0564	0.0219
BD57-1481	BA.2 BTI + BA.5/BF.7	F1	0.196	0.195	2.61	>10	>10	>10	>10	IGHV3-30	IGHJ4	IGKV1-39	IGKJ4	0.0622	0.0338
BD57-1482	BA.2 BTI + BA.5/BF.7	F3	>10	>10	0.00160	<0.0005	<0.0005	0.00128	0.000584	IGHV5-51	IGHJ2	IGKV1-39	IGKJ1	0.0703	0.0769
BD57-1483	BA.2 BTI + BA.5/BF.7	E1/E2.1	0.0331	0.0506	0.0328	0.250	0.367	0.244	0.168	IGHV1-69	IGHJ6	IGKV1-39	IGKJ1	0.0523	0.0627
BD57-1487	BA.2 BTI + BA.5/BF.7	--	>10	>10	>10	>10	>10	>10	>10	IGHV1-2	IGHJ6	IGKV1-33	IGKJ3	0.0373	0.0274
BD57-1494	BA.2 BTI + BA.5/BF.7	F3	>10	0.674	<0.0005	<0.0005	0.00124	0.00106	0.00132	IGHV5-51	IGHJ4	IGKV1-39	IGKJ2	0.0486	0.0488
BD57-1500	BA.2 BTI + BA.5/BF.7	F1	1.10	>10	>10	>10	>10	>10	>10	IGHV3-30	IGHJ4	IGKV1-39	IGKJ1	0.0609	0.0646
BD57-1502	BA.2 BTI + BA.5/BF.7	E1/E2.1	0.00305	>10	0.273	0.141	>10	>10	>10	IGHV3-33	IGHJ3	IGKV1-39	IGKJ2	0.059	0.0277
BD57-1503	BA.2 BTI + BA.5/BF.7	--	>10	>10	>10	>10	>10	>10	>10	IGHV5-51	IGHJ6	IGKV1-39	IGKJ4	0.0376	0.0439
BD57-1504	BA.2 BTI + BA.5/BF.7	A1	0.00504	0.00284	0.00875	0.00351	0.0132	0.0299	0.0136	IGHV3-53	IGHJ4	IGKV1-33	IGKJ2	0.0487	0.0185
BD57-1508	BA.2 BTI + BA.5/BF.7	--	0.144	0.154	1.95	0.998	>10	>10	>10	IGHV3-73	IGHJ3	IGKV1-39	IGKJ3	0.0926	0.087
BD57-1510	BA.2 BTI + BA.5/BF.7	F3	>10	>10	0.0413	0.174	>10	>10	>10	IGHV3-13	IGHJ4	IGKV1-33	IGKJ1	0.0507	0.0554
BD57-1515	BA.2 BTI + BA.5/BF.7	F1	1.20	>10	>10	>10	>10	>10	>10	IGHV3-30-3	IGHJ4	IGKV1-39	IGKJ1	0.0332	0.0277
BD57-1517	BA.2 BTI + BA.5/BF.7	--	>10	0.0298	0.00284	<0.0005	0.00216	0.00235	0.000642	IGHV5-51	IGHJ4	IGKV1-39	IGKJ1	0.0486	0.0342
BD57-1518	BA.2 BTI + BA.5/BF.7	A1	0.0198	0.00164	0.00841	0.00539	0.0403	0.0460	0.0440	IGHV3-53	IGHJ6	IGKV1-33	IGKJ3	0.0203	0.0154
BD57-1521	BA.2 BTI + BA.5/BF.7	--	0.481	>10	>10	>10	>10	>10	>10	IGHV3-30	IGHJ5	IGKV1-39	IGKJ1	0.0934	0.0903
BD57-1522	BA.2 BTI + BA.5/BF.7	--	0.0157	0.0278	0.0356	>10	>10	>10	>10	IGHV3-30	IGHJ4	IGKV1-39	IGKJ2	0.0499	0.028
BD57-1523	BA.2 BTI + BA.5/BF.7	--	>10	0.00227	0.00843	0.000912	0.0208	0.187	0.136	IGHV3-66	IGHJ4	IGKV1-33	IGKJ2	0.0402	0.0342
BD57-1525	BA.2 BTI + BA.5/BF.7	F1	>10	>10	>10	>10	>10	>10	>10	IGHV3-13	IGHJ5	IGKV1-39	IGKJ1	0.0381	0.0462
BD57-1528	BA.2 BTI + BA.5/BF.7	F3	>10	0.0238	0.00972	0.00772	0.00806	0.0126	0.0261	IGHV3-11	IGHJ3	IGKV1-33	IGKJ3	0.0423	0.0387
BD57-1529	BA.2 BTI + BA.5/BF.7	A1	0.00613	0.000841	0.00539	0.00275	0.0164	0.0103	0.00768	IGHV3-66	IGHJ3	IGKV1-33	IGKJ2	0.0312	0.028
BD57-1530	BA.2 BTI + BA.5/BF.7	A1	0.00322	>10	>10	0.000506	0.00937	0.0399	0.00703	IGHV3-53	IGHJ4	IGKV1-33	IGKJ1	0.0544	0.0373
BD57-1532	BA.2 BTI + BA.5/BF.7	F3	>10	<0.0005	0.00283	<0.0005	0.00477	0.00271	0.00189	IGHV1-24	IGHJ4	IGKV1-33	IGKJ4	0.0479	0.0439
BD57-1533	BA.2 BTI + BA.5/BF.7	D4	>10	>10	0.0393	0.00790	0.126	>10	>10	IGHV3-53	IGHJ5	IGKV1-33	IGKJ4	0.0549	0.0217
BD57-1534	BA.2 BTI + BA.5/BF.7	A1	>10	>10	0.0197	0.136	>10	>10	>10	IGHV3-53	IGHJ5	IGKV1-33	IGKJ4	0.0495	0.0248
BD57-1535	BA.2 BTI + BA.5/BF.7	E1/E2.1	0.00326	0.000910	0.00483	0.290	>10	0.0669	0.0906	IGHV1-69	IGHJ4	IGKV1-33	IGKJ2	0.0475	0.0562
BD57-1537	BA.2 BTI + BA.5/BF.7	A1	0.00208	0.00222	0.00575	0.0101	>10	>10	>10	IGHV3-53	IGHJ4	IGKV1-33	IGKJ1	0.0115	0.0248
BD57-1538	BA.2 BTI + BA.5/BF.7	A1	0.0102	0.00326	0.00911	0.00713	0.0264	0.0324	0.0231	IGHV3-33	IGHJ6	IGKV1-33	IGKJ4	0.0484	0.0462
BD57-1540	BA.2 BTI + BA.5/BF.7	A1	0.00360	0.000742	0.00394	0.000689	0.00512	0.00444	0.00208	IGHV3-66	IGHJ6	IGKV1-33	IGKJ3	0.0532	0.0217
BD57-1541	BA.2 BTI + BA.5/BF.7	A1	>10	0.00214	0.000926	0.00214	0.00789	0.00465	0.00258	IGHV3-53	IGHJ4	IGKV1-33	IGKJ2	0.0369	0.0092
BD57-1543	BA.2 BTI + BA.5/BF.7	D3	>10	0.00539	0.0139	0.0122	0.281	>10	>10	IGHV5-51	IGHJ5	IGKV1-33	IGKJ1	0.0398	0.0308
BD57-1544	BA.2 BTI + BA.5/BF.7	F3	>10	0.191	<0.0005	<0.0005	0.00323	0.00260	0.00178	IGHV3-11	IGHJ4	IGKV1-33	IGKJ5	0.0507	0.04
BD57-1545	BA.2 BTI + BA.5/BF.7	C/D1	0.000594	<0.0005	<0.0005	0.0116	0.0193	>10	>10	IGHV1-18	IGHJ4	IGKV1-33	IGKJ5	0.0795	0.0311
BD57-1547	BA.2 BTI + BA.5/BF.7	A1	0.0323	0.000793	0.00106	0.00126	0.00452	0.00338	0.00185	IGHV3-53	IGHJ4	IGKV1-33	IGKJ3	0.0514	0.0154
BD57-1551	BA.2 BTI + BA.5/BF.7	F3	>10	>10	0.000925	<0.0005	0.00719	0.00173	0.00274	IGHV5-51	IGHJ4	IGKV1-39	IGKJ2	0.0429	0.0308
BD57-1553	BA.2 BTI + BA.5/BF.7	F3	>10	1.17	0.000896	<0.0005	0.00939	0.00323	0.00294	IGHV5-51	IGHJ4	IGKV1-39	IGKJ2	0.0456	0.0246
BD57-1554	BA.2 BTI + BA.5/BF.7	E1/E2.1	0.00464	0.00434	0.00112	0.000596	>10	>10	>10	IGHV3-33	IGHJ3	IGKV1-39	IGKJ2	0.0718	0.0338
BD57-1556	BA.2 BTI + BA.5/BF.7	A1	0.0111	0.00225	0.00285	0.00270	0.0541	0.0292	0.0291	IGHV3-66	IGHJ4	IGKV1-33	IGKJ2	0.0436	0.028
BD57-1559	BA.2 BTI + BA.5/BF.7	--	>10	0.0485	0.0254	>10	>10	>10	>10	IGHV3-23	IGHJ6	IGKV1-17	IGKJ1	0.0452	0.0062
BD57-1563	BA.2 BTI + BA.5/BF.7	A1	0.00263	0.00300	0.000886	0.00173	0.0147	0.0119	0.00363	IGHV4-39	IGHJ5	IGKV1-NL1	IGKJ4	0.0625	0.0497
BD57-1564	BA.2 BTI + BA.5/BF.7	A1	0.00474	0.00437	0.00118	0.00221	0.0165	0.0116	0.00776	IGHV4-39	IGHJ5	IGKV1-NL1	IGKJ4	0.111	0.0466
BD57-1568	BA.2 BTI + BA.5/BF.7	F3	>10	0.000637	<0.0005	<0.0005	0.00228	0.00308	0.00149	IGHV5-51	IGHJ4	IGKV1-39	IGKJ2	0.0463	0.0282
BD57-1570	BA.2 BTI + BA.5/BF.7	E1/E2.1	0.00345	0.0296	0.00374	0.000681	>10	>10	>10	IGHV3-33	IGHJ3	IGKV1-39	IGKJ2	0.0638	0.0308
BD57-1571	BA.2 BTI + BA.5/BF.7	C/D1	>10	0.00201	0.00134	0.0263	0.0375	>10	>10	IGHV1-18	IGHJ6	IGKV1-39	IGKJ1	0.0356	0.028
BD57-1572	BA.2 BTI + BA.5/BF.7	F1	0.937	0.346	1.47	>10	>10	>10	>10	IGHV3-30	IGHJ5	IGKV1-39	IGKJ1	0.0499	0.0588
BD57-1574	BA.2 BTI + BA.5/BF.7	F1	>10	>10	>10	>10	>10	>10	>10	IGHV3-30	IGHJ4	IGKV1-39	IGKJ1	0.0378	0.0308
BD57-1575	BA.2 BTI + BA.5/BF.7	E1/E2.1	0.353	0.298	0.0259	0.301	>10	0.163	0.232	IGHV1-69	IGHJ6	IGKV1-39	IGKJ1	0.0413	0.047
BD57-1576	BA.2 BTI + BA.5/BF.7	E1/E2.1	0.850	0.439	0.0205	0.128	>10	0.122	0.230	IGHV1-69	IGHJ6	IGKV1-39	IGKJ1	0.0523	0.038
BD57-1577	BA.2 BTI + BA.5/BF.7	D2	>10	<0.0005	0.000710	0.000501	0.00669	0.00801	0.0112	IGHV4-30-4	IGHJ3	IGKV1-39	IGKJ2	0.0537	0.0369
BD57-1580	BA.2 BTI + BA.5/BF.7	F1	0.736	>10	>10	>10	>10	>10	>10	IGHV3-30	IGHJ5	IGKV1-39	IGKJ1	0.0467	0.0092
BD57-1582	BA.2 BTI + BA.5/BF.7	F1	>10	>10	>10	>10	>10	>10	>10	IGHV3-13	IGHJ4	IGKV1-39	IGKJ4	0.0249	0.0215
BD57-1584	BA.2 BTI + BA.5/BF.7	E1/E2.1	0.0101	0.108	0.0376	0.0149	>10	>10	>10	IGHV4-59	IGHJ3	IGKV1-39	IGKJ5	0.0486	0.0554
BD57-1586	BA.2 BTI + BA.5/BF.7	F3	>10	>10	0.00327	0.00116	0.00458	0.0181	0.0152	IGHV5-51	IGHJ5	IGKV1-39	IGKJ1	0.0436	0.0186
BD57-1587	BA.2 BTI + BA.5/BF.7	E1/E2.1	0.00399	0.00622	0.00534	0.00174	>10	>10	>10	IGHV3-33	IGHJ3	IGKV1-39	IGKJ2	0.0452	0.0154
BD57-1588	BA.2 BTI + BA.5/BF.7	E1/E2.1	0.00287	0.0738	0.0107	0.00181	>10	>10	>10	IGHV3-33	IGHJ3	IGKV1-39	IGKJ2	0.0559	0.0338
BD57-1589	BA.2 BTI + BA.5/BF.7	F3	>10	>10	0.00344	<0.0005	0.00184	0.00242	0.00124	IGHV5-51	IGHJ4	IGKV1-39	IGKJ3	0.0213	0.0124
BD57-1590	BA.2 BTI + BA.5/BF.7	F1	>10	>10	>10	>10	>10	>10	>10	IGHV3-13	IGHJ4	IGKV1-39	IGKJ5	0.0582	0.0402
BD57-1591	BA.2 BTI + BA.5/BF.7	C/D1	>10	0.00234	0.00970	0.179	0.312	>10	>10	IGHV1-46	IGHJ6	IGKV1-39	IGKJ1	0.0501	0.0062
BD57-1598	BA.2 BTI + BA.5/BF.7	A2	>10	0.00891	0.00656	1.22	>10	>10	>10	IGHV3-48	IGHJ3	IGKV1-39	IGKJ4	0.0463	0.0431
BD57-1600	BA.2 BTI + BA.5/BF.7	F3	>10	>10	0.000761	0.000697	0.00193	0.00257	0.00246	IGHV5-51	IGHJ4	IGKV1-39	IGKJ1	0.0443	0.0215
BD57-1602	BA.2 BTI + BA.5/BF.7	--	0.0678	0.514	0.906	1.27	>10	>10	>10	IGHV3-73	IGHJ3	IGKV1-39	IGKJ3	0.072	0.0714
BD57-1603	BA.2 BTI + BA.5/BF.7	F1	>10	>10	>10	>10	>10	>10	>10	IGHV3-30	IGHJ5	IGKV1-39	IGKJ1	0.0769	0.0498
BD57-1604	BA.2 BTI + BA.5/BF.7	F1	2.07	>10	>10	>10	>10	>10	>10	IGHV3-30	IGHJ5	IGKV1-39	IGKJ1	0.0962	0.0592
BD57-1605	BA.2 BTI + BA.5/BF.7	F1	>10	>10	>10	>10	>10	>10	>10	IGHV3-13	IGHJ2	IGKV1-39	IGKJ5	0.0514	0.0677
BD57-1606	BA.2 BTI + BA.5/BF.7	F1	>10	>10	>10	>10	>10	>10	>10	IGHV3-13	IGHJ2	IGKV1-39	IGKJ5	0.0595	0.0554
BD57-1608	BA.2 BTI + BA.5/BF.7	F1	>10	>10	>10	>10	>10	>10	>10	IGHV3-13	IGHJ2	IGKV1-39	IGKJ5	0.0514	0.0554
BD57-1609	BA.2 BTI + BA.5/BF.7	E1/E2.1	0.00551	0.0124	0.00508	0.00603	>10	>10	>10	IGHV3-33	IGHJ3	IGKV1-39	IGKJ2	0.0665	0.0246
BD57-1610	BA.2 BTI + BA.5/BF.7	E1/E2.1	0.00284	0.138	0.00846	0.0408	>10	>10	>10	IGHV4-59	IGHJ3	IGKV1-39	IGKJ5	0.0378	0.0246
BD57-1612	BA.2 BTI + BA.5/BF.7	--	>10	0.0196	0.00999	0.164	0.0538	>10	>10	IGHV3-23	IGHJ5	IGKV1-39	IGKJ2	0.0387	0.0373
BD57-1613	BA.2 BTI + BA.5/BF.7	E1/E2.1	0.0111	0.0913	0.0131	0.0137	>10	>10	>10	IGHV3-33	IGHJ3	IGKV1-39	IGKJ2	0.0665	0.0277
BD57-1614	BA.2 BTI + BA.5/BF.7	E3	1.13	>10	>10	0.847	>10	>10	>10	IGHV1-2	IGHJ4	IGKV1-39	IGKJ1	0.0486	0.0376
BD57-1616	BA.2 BTI + BA.5/BF.7	D2	0.0983	0.0333	0.00154	0.000562	>10	>10	>10	IGHV2-70	IGHJ6	IGKV1-39	IGKJ1	0.0136	0.0376
BD57-1617	BA.2 BTI + BA.5/BF.7	F3	>10	>10	<0.0005	0.000803	0.00212	0.00191	0.00143	IGHV5-51	IGHJ4	IGKV1-39	IGKJ1	0.0541	0.0554
BD57-1618	BA.2 BTI + BA.5/BF.7	F3	>10	>10	<0.0005	<0.0005	0.000795	0.000621	<0.0005	IGHV5-51	IGHJ5	IGKV1-39	IGKJ2	0.0162	0.0123
BD57-1619	BA.2 BTI + BA.5/BF.7	E1/E2.1	0.145	0.145	0.0499	0.496	>10	>10	>10	IGHV1-69	IGHJ6	IGKV1-39	IGKJ1	0.0358	0.0596
BD57-1620	BA.2 BTI + BA.5/BF.7	E1/E2.1	0.0744	0.246	0.0487	0.194	>10	0.138	0.168	IGHV1-69	IGHJ6	IGKV1-39	IGKJ1	0.0583	0.0721
BD57-1623	BA.2 BTI + BA.5/BF.7	D4	>10	0.00137	<0.0005	0.000646	0.00282	0.00931	0.0104	IGHV4-34	IGHJ6	IGKV1-39	IGKJ2	0.0606	0.0277
BD57-1628	BA.2 BTI + BA.5/BF.7	--	0.0101	0.00195	0.00225	0.00870	0.0235	0.00855	0.00998	IGHV3-66	IGHJ3	IGKV1-33	IGKJ2	0.0568	0.0374
BD57-1629	BA.2 BTI + BA.5/BF.7	F3	>10	>10	<0.0005	0.000843	0.00246	0.0143	0.00565	IGHV5-51	IGHJ4	IGKV1-39	IGKJ1	0.0243	0.0215
BD57-1631	BA.2 BTI + BA.5/BF.7	F3	>10	0.114	<0.0005	0.0101	0.456	>10	>10	IGHV1-24	IGHJ6	IGKV1-12	IGKJ4	0.0253	0.0435
BD57-1632	BA.2 BTI + BA.5/BF.7	D2	<0.0005	0.126	<0.0005	<0.0005	0.00774	>10	>10	IGHV4-31	IGHJ4	IGKV1-12	IGKJ4	0.0992	0.0807
BD57-1634	BA.2 BTI + BA.5/BF.7	A2	>10	0.00278	0.00197	0.0154	0.0187	0.0450	>10	IGHV3-48	IGHJ4	IGKV1-5	IGKJ1	0.0479	0.0342
BD57-1636	BA.2 BTI + BA.5/BF.7	D4	>10	0.0233	<0.0005	<0.0005	0.0715	>10	>10	IGHV5-51	IGHJ4	IGKV1-5	IGKJ1	0.0545	0.0599
BD57-1637	BA.2 BTI + BA.5/BF.7	D4	>10	0.0290	0.00224	0.000878	0.165	>10	>10	IGHV5-51	IGHJ4	IGKV1-5	IGKJ1	0.0436	0.0439
BD57-1638	BA.2 BTI + BA.5/BF.7	--	>10	>10	>10	>10	>10	>10	>10	IGHV2-70	IGHJ3	IGKV1-5	IGKJ2	0.0804	0.0807
BD57-1639	BA.2 BTI + BA.5/BF.7	--	>10	>10	>10	>10	>10	>10	>10	IGHV4-4	IGHJ4	IGKV1-5	IGKJ2	0.0475	0.0338
BD57-1640	BA.2 BTI + BA.5/BF.7	D3	0.172	<0.0005	<0.0005	0.000517	0.323	>10	>10	IGHV5-51	IGHJ3	IGKV1-5	IGKJ5	0.031	0.0217
BD57-1642	BA.2 BTI + BA.5/BF.7	F3	>10	>10	0.00518	0.00530	0.140	0.142	0.0869	IGHV2-5	IGHJ4	IGKV1-5	IGKJ1	0.0297	0.0313
BD57-1643	BA.2 BTI + BA.5/BF.7	D3	>10	0.419	0.0593	0.0608	0.188	0.478	0.385	IGHV4-38-2	IGHJ1	IGKV1-5	IGKJ1	0.0191	0.0094
BD57-1644	BA.2 BTI + BA.5/BF.7	A2	>10	0.00398	<0.0005	0.00227	0.0121	0.0236	0.0193	IGHV3-43D	IGHJ6	IGKV1-5	IGKJ1	0.0383	0.0157
BD57-1645	BA.2 BTI + BA.5/BF.7	F1	>10	>10	>10	>10	>10	>10	>10	IGHV1-24	IGHJ3	IGKV1-5	IGKJ2	0.0338	0.0093
BD57-1651	BA.2 BTI + BA.5/BF.7	A1	0.173	<0.0005	0.000772	0.00105	0.0912	>10	>10	IGHV3-53	IGHJ6	IGKV1-33	IGKJ2	0.0336	0.0277
BD57-1657	BA.2 BTI + BA.5/BF.7	F1	2.12	>10	>10	>10	>10	>10	>10	IGHV3-53	IGHJ3	IGKV1-5	IGKJ1	0.0578	0.0452
BD57-1658	BA.2 BTI + BA.5/BF.7	F1	>10	>10	>10	>10	>10	>10	>10	IGHV3-13	IGHJ6	IGKV1-39	IGKJ2	0.0327	0.059
BD57-1665	BA.2 BTI + BA.5/BF.7	--	0.516	>10	0.00260	>10	>10	>10	>10	IGHV3-9	IGHJ4	IGKV4-1	IGKJ2	0.0607	0.0379
BD57-1671	BA.2 BTI + BA.5/BF.7	A2	0.396	0.00176	0.00139	0.0150	0.350	>10	>10	IGHV3-43	IGHJ6	IGKV4-1	IGKJ4	0.0312	0.0147
BD57-1675	BA.2 BTI + BA.5/BF.7	E1/E2.1	0.00882	0.0114	<0.0005	0.00338	0.179	0.0250	0.0301	IGHV4-30-4	IGHJ6	IGKV4-1	IGKJ1	0.0349	0.0294
BD57-1680	BA.2 BTI + BA.5/BF.7	E2.2	0.200	>10	>10	>10	>10	>10	>10	IGHV3-33	IGHJ4	IGKV2-30	IGKJ2	0.0332	0.0208
BD57-1681	BA.2 BTI + BA.5/BF.7	C/D1	0.225	<0.0005	<0.0005	0.00869	0.0119	>10	>10	IGHV1-8	IGHJ4	IGKV2-28	IGKJ3	0.0451	0.0119
BD57-1694	BA.2 BTI + BA.5/BF.7	D3	0.0185	<0.0005	<0.0005	0.000578	0.00405	0.166	0.267	IGHV5-51	IGHJ3	IGKV2-40	IGKJ4	0.0901	0.0294
BD57-1696	BA.2 BTI + BA.5/BF.7	A1	>10	0.0148	0.0102	>10	>10	>10	>10	IGHV3-11	IGHJ4	IGKV2-40	IGKJ1	0.0426	0.0265
BD57-1699	BA.2 BTI + BA.5/BF.7	A1	>10	0.000961	0.00101	0.00266	0.00781	0.0379	0.0322	IGHV3-9	IGHJ3	IGKV2D-29	IGKJ2	0.0378	0.0235
BD57-1700	BA.2 BTI + BA.5/BF.7	A1	>10	0.00113	0.00386	0.00765	0.00917	>10	>10	IGHV3-9	IGHJ3	IGKV2D-29	IGKJ2	0.0351	0.0235
BD57-1704	BA.2 BTI + BA.5/BF.7	A2	>10	0.0176	0.0196	>10	>10	>10	>10	IGHV3-48	IGHJ4	IGKV2-24	IGKJ1	0.0169	0.0089
BD57-1706	BA.2 BTI + BA.5/BF.7	E3	>10	>10	>10	>10	>10	>10	>10	IGHV3-30	IGHJ4	IGKV1-5	IGKJ1	0.0354	0.0312
BD57-1707	BA.2 BTI + BA.5/BF.7	F3	>10	0.00647	0.00706	0.0116	0.0210	0.0246	0.0173	IGHV4-4	IGHJ4	IGKV1-33	IGKJ2	0.0503	0.0373
BD57-1708	BA.2 BTI + BA.5/BF.7	F3	>10	0.00157	0.00118	0.00136	0.00619	0.0219	0.00921	IGHV3-30	IGHJ4	IGKV1-33	IGKJ4	0.0426	0.0274
BD57-1709	BA.2 BTI + BA.5/BF.7	D2	0.00162	0.00495	<0.0005	<0.0005	0.00540	>10	>10	IGHV4-31	IGHJ4	IGKV1-12	IGKJ4	0.0885	0.0404
BD57-1719	BA.2 BTI + BA.5/BF.7	A2	>10	0.00706	0.00609	0.00696	0.0152	0.0350	0.0288	IGHV3-48	IGHJ5	IGKV3-11	IGKJ2	0.0778	0.0215
BD57-1722	BA.2 BTI + BA.5/BF.7	E1/E2.1	0.00518	0.00399	0.00267	0.0546	>10	>10	>10	IGHV3-30	IGHJ4	IGKV3-20	IGKJ4	0.0602	0.0615
BD57-1724	BA.2 BTI + BA.5/BF.7	B	0.00278	0.000818	0.00131	0.00609	0.0106	>10	0.686	IGHV1-58	IGHJ3	IGKV3-20	IGKJ1	0.0865	0.0492
BD57-1727	BA.2 BTI + BA.5/BF.7	A1	0.0115	0.00258	0.00421	0.0108	0.0426	0.0394	0.0341	IGHV3-66	IGHJ4	IGKV3-20	IGKJ4	0.0511	0.0554
BD57-1728	BA.2 BTI + BA.5/BF.7	B	0.00227	0.000980	0.00215	0.0235	0.0310	>10	>10	IGHV1-58	IGHJ3	IGKV3-20	IGKJ1	0.1	0.059
BD57-1733	BA.2 BTI + BA.5/BF.7	B	0.00234	0.000573	0.000581	0.00153	0.00453	0.116	0.505	IGHV1-58	IGHJ3	IGKV3-20	IGKJ1	0.0784	0.0462
BD57-1734	BA.2 BTI + BA.5/BF.7	A2	>10	0.0331	0.0582	0.0823	0.0821	0.0762	0.102	IGHV3-33	IGHJ3	IGKV3-20	IGKJ4	0.0681	0.0518
BD57-1738	BA.2 BTI + BA.5/BF.7	B	0.00186	<0.0005	<0.0005	0.00124	0.00122	0.00728	0.0332	IGHV1-58	IGHJ3	IGKV3-20	IGKJ1	0.0402	0.0338
BD57-1742	BA.2 BTI + BA.5/BF.7	A1	>10	<0.0005	0.000523	0.0962	0.140	>10	>10	IGHV3-43	IGHJ5	IGKV3-20	IGKJ2	0.0268	0.0154
BD57-1743	BA.2 BTI + BA.5/BF.7	D3	>10	<0.0005	<0.0005	<0.0005	0.0923	>10	>10	IGHV5-51	IGHJ3	IGKV3-20	IGKJ2	0.0366	0.0092
BD57-1745	BA.2 BTI + BA.5/BF.7	A1	0.00778	0.0294	0.108	0.0314	0.236	0.498	0.240	IGHV3-53	IGHJ4	IGKV3-20	IGKJ4	0.017	0.0155
BD57-1753	BA.2 BTI + BA.5/BF.7	A2	>10	>10	0.0282	0.0706	0.0513	0.0196	0.0511	IGHV3-48	IGHJ4	IGKV3-20	IGKJ4	0.0324	0.0215
BD57-1757	BA.2 BTI + BA.5/BF.7	D3	>10	0.00199	0.00392	0.00220	0.0387	>10	>10	IGHV5-51	IGHJ3	IGKV3-15	IGKJ5	0.0479	0.0435
BD57-1762	BA.2 BTI + BA.5/BF.7	D3	>10	0.0156	0.0264	0.00968	0.0589	>10	>10	IGHV5-51	IGHJ3	IGKV3-15	IGKJ1	0.0169	0.0124
BD57-1763	BA.2 BTI + BA.5/BF.7	D2	>10	>10	0.00916	0.136	>10	>10	>10	IGHV2-5	IGHJ4	IGKV3-15	IGKJ3	0.044	0.0217
BD57-1769	BA.2 BTI + BA.5/BF.7	F3	>10	0.0197	0.00291	0.00132	0.00270	0.00486	0.00554	IGHV3-30-3	IGHJ3	IGKV3-15	IGKJ1	0.0464	0.0154
BD57-1771	BA.2 BTI + BA.5/BF.7	D2	0.00858	<0.0005	<0.0005	<0.0005	0.415	>10	>10	IGHV2-5	IGHJ4	IGKV3-15	IGKJ3	0.0467	0.0156
BD57-1777	BA.2 BTI + BA.5/BF.7	D2	0.201	0.000552	<0.0005	<0.0005	0.166	>10	>10	IGHV2-5	IGHJ4	IGKV3-15	IGKJ3	0.0604	0.0621
BD57-1781	BA.2 BTI + BA.5/BF.7	--	0.154	>10	>10	>10	>10	>10	>10	IGHV1-69	IGHJ3	IGKV3-15	IGKJ1	0.0767	0.0376
BD57-1786	BA.2 BTI + BA.5/BF.7	--	>10	>10	>10	>10	>10	>10	>10	IGHV4-31	IGHJ2	IGKV3-20	IGKJ1	0.0831	0.0373
BD57-1787	BA.2 BTI + BA.5/BF.7	D3	>10	0.000649	<0.0005	<0.0005	0.0462	>10	>10	IGHV5-51	IGHJ4	IGKV3-15	IGKJ2	0.031	0.0311
BD57-1788	BA.2 BTI + BA.5/BF.7	D2	0.0239	0.000996	<0.0005	<0.0005	>10	>10	>10	IGHV2-5	IGHJ4	IGKV3-15	IGKJ3	0.0275	0.0124
BD57-1793	BA.2 BTI + BA.5/BF.7	F3	>10	>10	0.0546	0.0183	0.0558	0.0457	0.0245	IGHV4-4	IGHJ4	IGKV3-20	IGKJ2	0.0378	0.0308
BD57-1794	BA.2 BTI + BA.5/BF.7	A1	0.00397	0.00186	0.00488	0.00275	0.123	0.218	0.129	IGHV3-66	IGHJ4	IGKV3-20	IGKJ2	0.0506	0.0554
BD57-1795	BA.2 BTI + BA.5/BF.7	D2	0.0772	0.0273	<0.0005	0.000546	>10	>10	>10	IGHV2-5	IGHJ4	IGKV3-15	IGKJ3	0.0137	0.028
BD57-1797	BA.2 BTI + BA.5/BF.7	D2	0.0478	0.0129	<0.0005	<0.0005	>10	>10	>10	IGHV2-5	IGHJ4	IGKV3-15	IGKJ3	0.0495	0.0217
BD57-1798	BA.2 BTI + BA.5/BF.7	F3	>10	0.00222	<0.0005	0.000673	0.00354	0.00519	0.00304	IGHV1-24	IGHJ6	IGKV2-30	IGKJ1	0.0394	0.021
BD57-1804	BA.2 BTI + BA.5/BF.7	F1	0.176	>10	>10	0.718	>10	>10	>10	IGHV3-7	IGHJ5	IGLV6-57	IGLJ3	0.0562	0.0456
BD57-1805	BA.2 BTI + BA.5/BF.7	F1	>10	>10	0.672	0.336	0.444	0.253	0.290	IGHV3-23	IGHJ6	IGLV6-57	IGLJ2	0.0315	0.0121
BD57-1807	BA.2 BTI + BA.5/BF.7	F1	0.214	>10	>10	>10	>10	>10	>10	IGHV4-39	IGHJ4	IGLV6-57	IGLJ3	0.0531	0.039
BD57-1808	BA.2 BTI + BA.5/BF.7	F1	>10	>10	0.722	0.472	0.808	0.959	0.668	IGHV3-23	IGHJ4	IGLV6-57	IGLJ3	0.0357	0.0272
BD57-1809	BA.2 BTI + BA.5/BF.7	F1	>10	>10	1.33	0.518	0.643	0.778	0.873	IGHV3-66	IGHJ5	IGLV6-57	IGLJ2	0.0305	0.0242
BD57-1810	BA.2 BTI + BA.5/BF.7	F1	>10	>10	>10	0.788	>10	>10	>10	IGHV1-69	IGHJ4	IGLV6-57	IGLJ2	0.0495	0.0151
BD57-1811	BA.2 BTI + BA.5/BF.7	F1	>10	>10	0.669	0.377	0.661	0.647	0.596	IGHV3-23	IGHJ4	IGLV6-57	IGLJ2	0.033	0.0211
BD57-1812	BA.2 BTI + BA.5/BF.7	E1/E2.1	0.00113	<0.0005	<0.0005	<0.0005	>10	>10	>10	IGHV1-2	IGHJ5	IGLV6-57	IGLJ2	0.0343	0.0332
BD57-1813	BA.2 BTI + BA.5/BF.7	F1	>10	>10	1.35	0.542	1.28	1.30	1.20	IGHV3-7	IGHJ3	IGLV6-57	IGLJ3	0.0282	0.0211
BD57-1814	BA.2 BTI + BA.5/BF.7	F3	0.00370	0.00135	<0.0005	<0.0005	0.000571	0.00312	0.00270	IGHV3-30	IGHJ3	IGLV6-57	IGLJ3	0.0249	0.0211
BD57-1815	BA.2 BTI + BA.5/BF.7	D4	>10	0.000638	<0.0005	<0.0005	0.00158	0.00719	0.00252	IGHV3-30	IGHJ3	IGLV6-57	IGLJ3	0.0582	0.0182
BD57-1816	BA.2 BTI + BA.5/BF.7	A1	>10	0.00168	<0.0005	<0.0005	<0.0005	0.00453	0.00200	IGHV3-30	IGHJ3	IGLV6-57	IGLJ3	0.0388	0.0211
BD57-1817	BA.2 BTI + BA.5/BF.7	F1	>10	0.00788	<0.0005	0.000693	0.000641	>10	>10	IGHV4-61	IGHJ5	IGLV6-57	IGLJ2	0.0886	0.0271
BD57-1819	BA.2 BTI + BA.5/BF.7	F1	0.236	>10	>10	>10	>10	>10	>10	IGHV3-7	IGHJ5	IGLV6-57	IGLJ3	0.059	0.0274
BD57-1821	BA.2 BTI + BA.5/BF.7	F1	0.265	>10	7.44	>10	>10	>10	>10	IGHV1-18	IGHJ4	IGLV6-57	IGLJ3	0.0388	0.0181
BD57-1822	BA.2 BTI + BA.5/BF.7	--	>10	>10	0.436	0.339	0.555	0.534	0.364	IGHV4-61	IGHJ5	IGLV6-57	IGLJ2	0.111	0.0482
BD57-1824	BA.2 BTI + BA.5/BF.7	D4	>10	>10	>10	>10	>10	>10	>10	IGHV1-46	IGHJ4	IGLV1-44	IGLJ3	0.0989	0.239
BD57-1826	BA.2 BTI + BA.5/BF.7	D4	>10	>10	>10	>10	>10	>10	>10	IGHV3-15	IGHJ4	IGLV7-46	IGLJ2	0.0602	0.0453
BD57-1827	BA.2 BTI + BA.5/BF.7	D4	>10	>10	>10	>10	>10	>10	>10	IGHV3-15	IGHJ4	IGLV7-46	IGLJ2	0.0287	0.021
BD57-1828	BA.2 BTI + BA.5/BF.7	D3	>10	>10	0.0137	0.0244	0.0734	>10	>10	IGHV3-15	IGHJ4	IGLV7-46	IGLJ3	0.0229	0.0244
BD57-1832	BA.2 BTI + BA.5/BF.7	D4	0.000978	0.00187	0.00309	0.00172	0.0286	0.00863	0.0153	IGHV1-46	IGHJ4	IGLV1-44	IGLJ3	0.0577	0.236
BD57-1836	BA.2 BTI + BA.5/BF.7	D2	0.00168	0.00425	0.00612	0.00384	0.295	>10	>10	IGHV2-5	IGHJ4	IGLV2-14	IGLJ3	0.0559	0.0396
BD57-1839	BA.2 BTI + BA.5/BF.7	D4	>10	<0.0005	0.00210	0.000569	0.00316	0.00109	0.00155	IGHV1-8	IGHJ5	IGLV2-23	IGLJ3	0.0324	0.0457
BD57-1844	BA.2 BTI + BA.5/BF.7	F1	>10	0.783	0.202	0.147	0.0966	0.117	0.0425	IGHV1-2	IGHJ4	IGLV2-14	IGLJ3	0.0549	0.0393
BD57-1845	BA.2 BTI + BA.5/BF.7	F3	0.0297	0.000659	0.000827	<0.0005	<0.0005	0.000725	0.000892	IGHV4-31	IGHJ5	IGLV2-14	IGLJ2	0.0577	0.0242
BD57-1850	BA.2 BTI + BA.5/BF.7	D2	0.000904	0.00717	0.00105	<0.0005	>10	>10	>10	IGHV2-5	IGHJ4	IGLV2-14	IGLJ2	0.0615	0.0422
BD57-1851	BA.2 BTI + BA.5/BF.7	E1/E2.1	0.0118	0.170	0.0829	0.209	>10	>10	>10	IGHV3-9	IGHJ6	IGLV2-14	IGLJ3	0.0447	0.0272
BD57-1852	BA.2 BTI + BA.5/BF.7	D2	0.194	>10	0.00314	0.000952	0.00288	>10	>10	IGHV1-46	IGHJ2	IGLV2-14	IGLJ3	0.0686	0.0363
BD57-1853	BA.2 BTI + BA.5/BF.7	E1/E2.1	0.00894	0.0348	0.0560	0.196	>10	>10	>10	IGHV3-9	IGHJ6	IGLV2-14	IGLJ3	0.0373	0.0272
BD57-1854	BA.2 BTI + BA.5/BF.7	D4	>10	0.00145	0.000706	0.00208	0.0104	2.14	1.84	IGHV4-31	IGHJ2	IGLV2-14	IGLJ2	0.03	0.0242
BD57-1855	BA.2 BTI + BA.5/BF.7	--	0.0130	0.0449	0.116	>10	>10	>10	>10	IGHV3-9	IGHJ6	IGLV2-14	IGLJ1	0.0177	0.0121
BD57-1859	BA.2 BTI + BA.5/BF.7	A2	>10	0.00297	0.000733	0.0140	0.0464	0.0893	0.0370	IGHV3-9	IGHJ6	IGLV2-23	IGLJ1	0.0293	0.0269
BD57-1864	BA.2 BTI + BA.5/BF.7	E1/E2.1	0.0178	0.0218	0.00321	0.0151	>10	0.138	0.150	IGHV3-9	IGHJ6	IGLV2-14	IGLJ2	0.0423	0.0206
BD57-1866	BA.2 BTI + BA.5/BF.7	D4	>10	0.00430	0.00872	0.0897	0.218	0.148	0.161	IGHV1-8	IGHJ4	IGLV2-23	IGLJ3	0.0293	0.0485
BD57-1868	BA.2 BTI + BA.5/BF.7	D2	0.0189	>10	0.0121	0.0136	>10	>10	>10	IGHV3-30	IGHJ4	IGLV2-8	IGLJ1	0.0879	0.0272
BD57-1872	BA.2 BTI + BA.5/BF.7	D2	0.0102	0.0678	0.00498	0.00279	>10	>10	>10	IGHV3-30	IGHJ4	IGLV2-8	IGLJ1	0.0746	0.0359
BD57-1875	BA.2 BTI + BA.5/BF.7	D4	>10	<0.0005	0.000872	0.00447	0.00740	0.00232	0.00317	IGHV4-39	IGHJ4	IGLV2-8	IGLJ3	0.0297	0.0154
BD57-1878	BA.2 BTI + BA.5/BF.7	D2	<0.0005	0.000913	0.00124	<0.0005	<0.0005	0.0134	0.00720	IGHV1-69	IGHJ4	IGLV1-44	IGLJ2	0.0672	0.0544
BD57-1886	BA.2 BTI + BA.5/BF.7	D4	0.469	0.000526	0.00218	<0.0005	<0.0005	0.000928	<0.0005	IGHV4-31	IGHJ1	IGLV2-11	IGLJ2	0.0349	0.0183
BD57-1889	BA.2 BTI + BA.5/BF.7	D4	>10	0.000625	0.00359	0.000795	0.00178	0.00365	0.00395	IGHV1-8	IGHJ3	IGLV2-11	IGLJ3	0.0649	0.0332
BD57-1891	BA.2 BTI + BA.5/BF.7	D2	0.0120	<0.0005	<0.0005	<0.0005	0.0505	0.0296	0.0313	IGHV2-5	IGHJ4	IGLV1-47	IGLJ1	0.0251	0.0514
BD57-1892	BA.2 BTI + BA.5/BF.7	--	0.758	<0.0005	0.00130	>10	>10	>10	>10	IGHV3-20	IGHJ4	IGLV1-44	IGLJ2	0.044	0.0182
BD57-1893	BA.2 BTI + BA.5/BF.7	F3	>10	0.00373	0.00324	<0.0005	0.00375	0.00113	0.000826	IGHV4-30-4	IGHJ5	IGLV1-40	IGLJ2	0.0514	0.0178
BD57-1894	BA.2 BTI + BA.5/BF.7	D2	>10	>10	0.0164	0.0174	>10	>10	>10	IGHV2-70	IGHJ4	IGLV1-44	IGLJ1	0.0218	0.0272
BD57-1902	BA.2 BTI + BA.5/BF.7	D2	0.0101	<0.0005	<0.0005	<0.0005	0.0339	0.00662	0.00389	IGHV2-5	IGHJ4	IGLV1-44	IGLJ3	0.0361	0.0181
BD57-1903	BA.2 BTI + BA.5/BF.7	D3	>10	0.00999	0.0196	0.0186	0.0455	>10	>10	IGHV5-51	IGHJ4	IGLV1-47	IGLJ1	0.0134	0.0302
BD57-1904	BA.2 BTI + BA.5/BF.7	F3	>10	>10	0.0471	0.0357	0.0590	0.0742	0.0994	IGHV1-2	IGHJ5	IGLV1-44	IGLJ2	0.0486	0.033
BD57-1905	BA.2 BTI + BA.5/BF.7	B	>10	0.0182	0.0194	0.0128	0.0973	0.293	0.195	IGHV3-21	IGHJ5	IGLV1-44	IGLJ3	0.0604	0.0453
BD57-1910	BA.2 BTI + BA.5/BF.7	--	0.140	0.00177	<0.0005	>10	>10	>10	>10	IGHV6-1	IGHJ4	IGLV1-47	IGLJ1	0.0412	0.0202
BD57-1914	BA.2 BTI + BA.5/BF.7	D2	>10	0.0907	0.00827	0.0131	>10	>10	>10	IGHV2-5	IGHJ5	IGLV1-47	IGLJ2	0.022	0.0212
BD57-1915	BA.2 BTI + BA.5/BF.7	D2	0.0126	0.159	0.000776	0.00109	>10	>10	>10	IGHV2-5	IGHJ5	IGLV1-47	IGLJ3	0.0942	0.0636
BD57-1918	BA.2 BTI + BA.5/BF.7	A1	>10	0.0122	0.00202	0.00824	0.0454	0.0103	0.0106	IGHV4-30-4	IGHJ4	IGLV1-51	IGLJ1	0.0305	0.0297
BD57-1930	BA.2 BTI + BA.5/BF.7	--	>10	0.0447	0.00146	0.00491	0.0198	>10	>10	IGHV3-9	IGHJ3	IGLV1-51	IGLJ1	0.0416	0.0211
BD57-1932	BA.2 BTI + BA.5/BF.7	--	0.00705	0.193	0.239	>10	>10	>10	>10	IGHV3-30-3	IGHJ6	IGLV1-51	IGLJ3	0.0341	0.0121
BD57-1933	BA.2 BTI + BA.5/BF.7	--	0.00791	0.0111	0.0150	0.0159	>10	>10	>10	IGHV3-30	IGHJ6	IGLV1-51	IGLJ2	0.0491	0.0453
BD57-1938	BA.2 BTI + BA.5/BF.7	E1/E2.1	0.0223	0.471	0.276	0.465	>10	>10	>10	IGHV3-30	IGHJ3	IGLV1-40	IGLJ3	0.0456	0.015
BD57-1940	BA.2 BTI + BA.5/BF.7	E2.2	0.320	0.546	0.132	>10	>10	>10	>10	IGHV1-69	IGHJ4	IGLV1-40	IGLJ2	0.0643	0.0269
BD57-1941	BA.2 BTI + BA.5/BF.7	E1/E2.1	0.00413	0.121	0.0112	0.00821	>10	>10	>10	IGHV3-30	IGHJ4	IGLV1-40	IGLJ2	0.071	0.0386
BD57-1943	BA.2 BTI + BA.5/BF.7	E2.2	0.0703	0.114	0.0378	0.620	>10	0.248	0.348	IGHV1-69	IGHJ3	IGLV1-40	IGLJ2	0.104	0.0479
BD57-1945	BA.2 BTI + BA.5/BF.7	E2.2	0.360	0.177	0.0718	0.660	>10	1.31	1.03	IGHV1-69	IGHJ4	IGLV1-40	IGLJ2	0.097	0.0269
BD57-1955	BA.2 BTI + BA.5/BF.7	E2.2	0.205	0.120	0.0437	0.322	0.981	0.940	0.453	IGHV1-69	IGHJ4	IGLV1-40	IGLJ2	0.0375	0.0269
BD57-1957	BA.2 BTI + BA.5/BF.7	--	0.178	0.324	0.0882	>10	>10	>10	>10	IGHV1-69	IGHJ4	IGLV1-40	IGLJ2	0.067	0.0452
BD57-1958	BA.2 BTI + BA.5/BF.7	D2	0.0513	0.00947	0.00206	0.000936	>10	>10	>10	IGHV2-5	IGHJ3	IGLV1-47	IGLJ3	0.0293	0.0274
BD57-1962	BA.2 BTI + BA.5/BF.7	D3	>10	0.000502	<0.0005	<0.0005	0.00152	0.000546	0.00121	IGHV3-7	IGHJ4	IGLV3-25	IGLJ3	0.0518	0.0439
BD57-1969	BA.2 BTI + BA.5/BF.7	E1/E2.1	0.0100	0.0170	0.00463	0.0133	>10	0.0592	0.115	IGHV3-9	IGHJ6	IGLV3-21	IGLJ2	0.0716	0.0492
BD57-1970	BA.2 BTI + BA.5/BF.7	D3	>10	0.00125	<0.0005	<0.0005	0.00188	0.00104	0.00168	IGHV2-70	IGHJ6	IGLV3-25	IGLJ2	0.0246	0.0251
BD57-1972	BA.2 BTI + BA.5/BF.7	D3	>10	0.00542	0.000835	0.00175	0.00450	0.0447	0.101	IGHV2-70	IGHJ6	IGLV3-25	IGLJ3	0.0437	0.0427
BD57-1977	BA.2 BTI + BA.5/BF.7	D3	>10	0.0772	0.0665	0.0352	0.399	>10	>10	IGHV4-39	IGHJ5	IGLV3-9	IGLJ2	0.0609	0.0096
BD57-1980	BA.2 BTI + BA.5/BF.7	D3	>10	0.00491	0.00424	0.00571	0.0186	>10	>10	IGHV2-70	IGHJ6	IGLV3-25	IGLJ3	0.0267	0.0396
BD57-1981	BA.2 BTI + BA.5/BF.7	D3	>10	0.00238	<0.0005	0.000662	0.00214	0.0111	0.0147	IGHV2-70	IGHJ6	IGLV3-25	IGLJ2	0.0383	0.0462
BD57-1988	BA.2 BTI + BA.5/BF.7	F1	>10	>10	>10	>10	>10	>10	>10	IGHV2-5	IGHJ5	IGLV3-25	IGLJ2	0.0288	0.0313
BD57-2008	BA.2 BTI + BA.5/BF.7	D3	>10	0.00127	<0.0005	0.000660	0.00104	0.0317	0.0171	IGHV2-70	IGHJ6	IGLV3-25	IGLJ2	0.0383	0.04
BD57-2010	BA.2 BTI + BA.5/BF.7	D3	>10	0.00136	<0.0005	0.00127	0.00340	0.00446	0.00175	IGHV2-70	IGHJ6	IGLV3-25	IGLJ2	0.0383	0.0431
BD57-2014	BA.2 BTI + BA.5/BF.7	D3	>10	0.00165	0.00158	0.00335	0.00441	>10	>10	IGHV2-70	IGHJ6	IGLV3-25	IGLJ3	0.0213	0.0305
BD57-2018	BA.2 BTI + BA.5/BF.7	F1	>10	>10	>10	>10	>10	>10	>10	IGHV4-61	IGHJ5	IGLV3-25	IGLJ2	0.0182	0.0189
BD57-2020	BA.2 BTI + BA.5/BF.7	F1	>10	>10	>10	>10	>10	>10	>10	IGHV4-61	IGHJ5	IGLV3-25	IGLJ2	0.0286	0.0252
BD57-2029	BA.2 BTI + BA.5/BF.7	C/D1	0.313	<0.0005	<0.0005	0.00209	0.00135	>10	0.0314	IGHV3-15	IGHJ3	IGLV3-1	IGLJ1	0.0605	0.0476
BD57-2035	BA.2 BTI + BA.5/BF.7	D3	>10	>10	0.00567	0.00432	0.0772	>10	>10	IGHV4-39	IGHJ5	IGLV3-9	IGLJ2	0.0577	0.0449
BD57-2036	BA.2 BTI + BA.5/BF.7	--	>10	0.0337	0.0485	0.00834	0.0891	>10	>10	IGHV3-15	IGHJ4	IGLV3-1	IGLJ2	0.0176	0.0564
BD57-2038	BA.2 BTI + BA.5/BF.7	C/D1	1.25	<0.0005	<0.0005	0.00452	0.00568	>10	>10	IGHV3-15	IGHJ4	IGLV3-1	IGLJ2	0.0771	0.0662
BD57-2040	BA.2 BTI + BA.5/BF.7	--	>10	>10	>10	>10	>10	>10	>10	IGHV3-7	IGHJ4	IGLV3-21	IGLJ3	0.102	0.12
BD57-2041	BA.2 BTI + BA.5/BF.7	F1	0.649	>10	>10	>10	>10	>10	>10	IGHV3-9	IGHJ4	IGLV3-21	IGLJ2	0.036	0.0369
BD57-2042	BA.2 BTI + BA.5/BF.7	D3	>10	0.0360	0.00161	0.00188	0.289	>10	>10	IGHV5-51	IGHJ3	IGLV3-21	IGLJ7	0.0621	0.0615
BD57-2043	BA.2 BTI + BA.5/BF.7	E1/E2.1	0.00398	0.0153	0.00770	0.280	>10	>10	>10	IGHV3-9	IGHJ6	IGLV3-21	IGLJ2	0.0716	0.0615
BD57-2044	BA.2 BTI + BA.5/BF.7	F1	0.188	>10	>10	>10	>10	>10	>10	IGHV3-9	IGHJ5	IGLV3-21	IGLJ1	0.03	0.028
BD57-2045	BA.2 BTI + BA.5/BF.7	A1	0.00913	0.00303	0.000644	0.00126	0.0222	0.0410	0.0480	IGHV3-66	IGHJ6	IGLV3-21	IGLJ2	0.057	0.0369
BD57-2046	BA.2 BTI + BA.5/BF.7	--	>10	0.0572	>10	>10	>10	>10	>10	IGHV3-11	IGHJ5	IGLV3-21	IGLJ2	0.0541	0.0308
BD57-2047	BA.2 BTI + BA.5/BF.7	D4	>10	0.000825	<0.0005	<0.0005	0.00311	0.00502	0.00933	IGHV3-43	IGHJ4	IGLV3-21	IGLJ2	0.0568	0.0279
BD57-2048	BA.2 BTI + BA.5/BF.7	E2.2	>10	>10	>10	>10	>10	>10	>10	IGHV3-64D	IGHJ4	IGLV3-21	IGLJ2	0.0378	0.0185
BD57-2049	BA.2 BTI + BA.5/BF.7	E2.2	>10	>10	>10	>10	>10	>10	>10	IGHV3-48	IGHJ4	IGLV3-21	IGLJ3	0.0526	0.0335
BD57-2051	BA.2 BTI + BA.5/BF.7	E2.2	>10	0.0416	0.0331	>10	>10	>10	>10	IGHV1-46	IGHJ4	IGLV3-21	IGLJ2	0.0324	0.0151
BD57-2053	BA.2 BTI + BA.5/BF.7	E1/E2.1	0.0282	0.243	0.240	>10	>10	>10	>10	IGHV3-13	IGHJ5	IGLV3-21	IGLJ2	0.0385	0.0246
BD57-2055	BA.2 BTI + BA.5/BF.7	--	>10	>10	>10	>10	>10	>10	>10	IGHV1-8	IGHJ4	IGLV3-21	IGLJ2	0.0189	0.0302
BD57-2058	BA.2 BTI + BA.5/BF.7	C/D1	>10	<0.0005	<0.0005	0.0140	0.00551	0.0235	0.0136	IGHV4-61	IGHJ4	IGLV3-21	IGLJ2	0.0526	0.0363
BD57-2218	BA.1 + BA.5/BF.7	--	>10	0.00113	0.00439	0.00161	--	0.0145	0.0150	IGHV1-69	IGHJ3	IGKV2-28	IGKJ1	0.0871	0.021
BD57-2219	BA.1 + BA.5/BF.7	--	>10	0.000663	<0.0005	<0.0005	--	0.00216	0.00177	IGHV1-69-2	IGHJ3	IGKV1-39	IGKJ4	0.116	0.0708
BD57-2220	BA.1 + BA.5/BF.7	--	>10	--	--	>10	--	--	>10	IGHV1-69	IGHJ6	IGKV1-9	IGKJ1	0.0439	0.0155
BD57-2221	BA.1 + BA.5/BF.7	--	2.38	>10	0.370	0.822	--	>10	>10	IGHV3-30-3	IGHJ4	IGKV1-39	IGKJ1	0.0623	0.0585
BD57-2222	BA.1 + BA.5/BF.7	--	0.000909	0.00110	0.00216	<0.0005	--	0.00196	<0.0005	IGHV1-69	IGHJ4	IGKV1-33	IGKJ4	0.0824	0.0411
BD57-2223	BA.1 + BA.5/BF.7	--	<0.0005	0.000783	0.00153	<0.0005	--	0.000622	<0.0005	IGHV1-69	IGHJ4	IGKV1-33	IGKJ4	0.0797	0.0443
BD57-2224	BA.1 + BA.5/BF.7	--	0.301	0.172	0.126	0.183	--	0.654	0.392	IGHV5-51	IGHJ6	IGKV1-39	IGKJ1	0.0866	0.0769
BD57-2225	BA.1 + BA.5/BF.7	--	0.00160	<0.0005	<0.0005	<0.0005	--	0.000506	<0.0005	IGHV1-69	IGHJ4	IGKV1-33	IGKJ4	0.058	0.0533
BD57-2228	BA.1 + BA.5/BF.7	--	>10	--	--	>10	--	--	>10	IGHV3-9	IGHJ4	IGKV1-33	IGKJ5	0.0388	0.0404
BD57-2229	BA.1 + BA.5/BF.7	--	0.00269	<0.0005	0.000645	<0.0005	--	0.00117	<0.0005	IGHV1-69	IGHJ1	IGKV1-33	IGKJ4	0.0514	0.047
BD57-2231	BA.1 + BA.5/BF.7	--	>10	0.00188	0.103	0.773	--	0.0603	>10	IGHV1-69-2	IGHJ3	IGKV1-39	IGKJ4	0.0508	0.0585
BD57-2232	BA.1 + BA.5/BF.7	--	0.261	0.00415	0.00388	0.00449	--	0.0856	0.0408	IGHV1-46	IGHJ4	IGKV1-39	IGKJ5	0.0691	0.0439
BD57-2233	BA.1 + BA.5/BF.7	--	>10	--	--	>10	--	--	>10	IGHV4-34	IGHJ5	IGKV1-39	IGKJ1	0.0372	0.0281
BD57-2234	BA.1 + BA.5/BF.7	--	>10	--	--	>10	--	--	>10	IGHV5-10-1	IGHJ6	IGKV1-39	IGKJ2	0.0379	0.0466
BD57-2235	BA.1 + BA.5/BF.7	--	>10	0.00276	0.00220	0.0108	--	0.617	>10	IGHV1-46	IGHJ4	IGKV1-39	IGKJ4	0.0445	0.0342
BD57-2236	BA.1 + BA.5/BF.7	--	>10	>10	>10	1.92	--	>10	>10	IGHV1-69	IGHJ4	IGKV1-39	IGKJ2	0.0275	0.0124
BD57-2237	BA.1 + BA.5/BF.7	--	>10	--	--	>10	--	--	>10	IGHV5-10-1	IGHJ6	IGKV1-39	IGKJ2	0.0538	0.0217
BD57-2238	BA.1 + BA.5/BF.7	--	>10	--	--	>10	--	--	>10	IGHV3-30-3	IGHJ4	IGKV1-39	IGKJ5	0.027	0.0215
BD57-2239	BA.1 + BA.5/BF.7	--	>10	--	--	>10	--	--	>10	IGHV3-23	IGHJ4	IGKV1-17	IGKJ1	0.0965	0.0652
BD57-2240	BA.1 + BA.5/BF.7	--	1.08	>10	1.21	1.26	--	1.63	1.41	IGHV5-51	IGHJ3	IGKV1-12	IGKJ5	0.027	0.0248
BD57-2241	BA.1 + BA.5/BF.7	--	2.01	>10	0.900	2.03	--	>10	>10	IGHV4-59	IGHJ6	IGKV1-12	IGKJ3	0.0383	0.0312
BD57-2242	BA.1 + BA.5/BF.7	--	>10	--	--	>10	--	--	>10	IGHV1-46	IGHJ4	IGKV1-5	IGKJ1	0.0521	0.0062
BD57-2243	BA.1 + BA.5/BF.7	--	2.00	>10	>10	2.77	--	>10	>10	IGHV3-30	IGHJ4	IGKV1-5	IGKJ1	0.0536	0.0345
BD57-2244	BA.1 + BA.5/BF.7	--	>10	<0.0005	<0.0005	0.000661	--	0.00923	>10	IGHV3-30	IGHJ4	IGKV1-5	IGKJ1	0.0676	0.0435
BD57-2245	BA.1 + BA.5/BF.7	--	>10	0.00102	0.00104	0.00168	--	0.0263	>10	IGHV3-30	IGHJ4	IGKV1-5	IGKJ1	0.0648	0.0251
BD57-2246	BA.1 + BA.5/BF.7	--	0.629	0.00283	0.00138	0.00589	--	0.107	>10	IGHV3-30	IGHJ4	IGKV1-5	IGKJ1	0.0531	0.0311
BD57-2247	BA.1 + BA.5/BF.7	--	>10	0.00131	0.000979	0.00440	--	0.832	>10	IGHV3-30	IGHJ4	IGKV1-5	IGKJ1	0.062	0.0248
BD57-2249	BA.1 + BA.5/BF.7	--	>10	0.00158	0.00279	0.00578	--	0.0461	0.0184	IGHV4-39	IGHJ4	IGKV1-5	IGKJ4	0.0958	0.0277
BD57-2251	BA.1 + BA.5/BF.7	--	>10	0.00286	0.00573	0.0116	--	>10	>10	IGHV5-51	IGHJ5	IGKV2-29	IGKJ1	0.0451	0.0389
BD57-2252	BA.1 + BA.5/BF.7	--	>10	0.000654	0.000898	0.00141	--	>10	>10	IGHV5-51	IGHJ4	IGKV2D-29	IGKJ5	0.031	0.0297
BD57-2253	BA.1 + BA.5/BF.7	--	>10	--	--	>10	--	--	>10	IGHV3-48	IGHJ4	IGKV4-1	IGKJ5	0.0361	0.0147
BD57-2254	BA.1 + BA.5/BF.7	--	>10	--	--	>10	--	--	>10	IGHV3-30-3	IGHJ3	IGKV4-1	IGKJ2	0.0462	0.0204
BD57-2255	BA.1 + BA.5/BF.7	--	>10	0.00127	0.0501	0.137	--	>10	>10	IGHV4-59	IGHJ3	IGKV4-1	IGKJ4	0.0394	0.0147
BD57-2256	BA.1 + BA.5/BF.7	--	>10	0.00112	0.00787	0.0221	--	0.575	0.543	IGHV4-59	IGHJ4	IGKV4-1	IGKJ4	0.0592	0.0356
BD57-2257	BA.1 + BA.5/BF.7	--	>10	0.00104	0.00306	0.00205	--	>10	>10	IGHV5-51	IGHJ3	IGKV2D-29	IGKJ2	0.0225	0.0118
BD57-2258	BA.1 + BA.5/BF.7	--	0.0550	<0.0005	<0.0005	<0.0005	--	>10	>10	IGHV5-51	IGHJ4	IGKV2-29	IGKJ1	0.0338	0.0119
BD57-2259	BA.1 + BA.5/BF.7	--	0.119	0.0111	0.0148	0.0578	--	>10	>10	IGHV3-21	IGHJ4	IGKV2-24	IGKJ5	0.0372	0.0148
BD57-2260	BA.1 + BA.5/BF.7	--	>10	--	--	>10	--	--	>10	IGHV4-61	IGHJ4	IGKV2-28	IGKJ2	0.0919	0.0329
BD57-2261	BA.1 + BA.5/BF.7	--	>10	<0.0005	0.00564	0.00468	--	>10	>10	IGHV3-11	IGHJ3	IGKV3-11	IGKJ4	0.0353	0.0124
BD57-2262	BA.1 + BA.5/BF.7	--	>10	--	--	>10	--	--	>10	IGHV3-30	IGHJ6	IGKV3-11	IGKJ5	0.0298	0.0124
BD57-2263	BA.1 + BA.5/BF.7	--	>10	--	--	>10	--	--	>10	IGHV1-46	IGHJ4	IGKV6-21	IGKJ5	0.0302	0.0217
BD57-2264	BA.1 + BA.5/BF.7	--	>10	<0.0005	<0.0005	<0.0005	--	>10	>10	IGHV5-51	IGHJ4	IGKV3-20	IGKJ4	0.0423	0.0311
BD57-2265	BA.1 + BA.5/BF.7	--	>10	>10	>10	1.17	--	>10	>10	IGHV1-69	IGHJ6	IGKV3-20	IGKJ1	0.0625	0.0215
BD57-2266	BA.1 + BA.5/BF.7	--	>10	>10	>10	0.483	--	>10	>10	IGHV4-59	IGHJ4	IGKV3-20	IGKJ2	0.0426	0.0215
BD57-2267	BA.1 + BA.5/BF.7	--	0.170	<0.0005	0.000831	0.000896	--	>10	>10	IGHV5-51	IGHJ4	IGKV3-20	IGKJ4	0.0507	0.0343
BD57-2268	BA.1 + BA.5/BF.7	--	0.0114	<0.0005	<0.0005	<0.0005	--	>10	>10	IGHV2-70	IGHJ2	IGKV3-20	IGKJ4	0.0305	0.0373
BD57-2269	BA.1 + BA.5/BF.7	--	0.0382	0.000757	0.00278	0.00129	--	>10	>10	IGHV5-51	IGHJ4	IGKV3-20	IGKJ4	0.0338	0.0124
BD57-2270	BA.1 + BA.5/BF.7	--	>10	0.0166	0.0290	0.0122	--	0.0301	0.0126	IGHV4-30-4	IGHJ2	IGKV3-20	IGKJ2	0.0648	0.0183
BD57-2271	BA.1 + BA.5/BF.7	--	0.0508	0.0140	0.0721	0.189	--	>10	>10	IGHV4-31	IGHJ6	IGKV3-20	IGKJ1	0.0461	0.0369
BD57-2272	BA.1 + BA.5/BF.7	--	>10	>10	>10	2.43	--	>10	>10	IGHV3-11	IGHJ4	IGKV3-20	IGKJ2	0.0423	0.0246
BD57-2273	BA.1 + BA.5/BF.7	--	0.00422	0.00124	<0.0005	<0.0005	--	>10	>10	IGHV2-5	IGHJ4	IGKV3-15	IGKJ4	0.0354	0.028
BD57-2274	BA.1 + BA.5/BF.7	--	0.212	0.000532	<0.0005	<0.0005	--	>10	>10	IGHV2-5	IGHJ4	IGKV3-15	IGKJ4	0.0412	0.0344
BD57-2275	BA.1 + BA.5/BF.7	--	>10	<0.0005	<0.0005	<0.0005	--	0.0281	0.0143	IGHV5-51	IGHJ4	IGKV3-15	IGKJ1	0.0332	0.0369
BD57-2276	BA.1 + BA.5/BF.7	--	>10	>10	>10	2.87	--	>10	>10	IGHV1-18	IGHJ4	IGKV3-15	IGKJ1	0.0522	0.0154
BD57-2277	BA.1 + BA.5/BF.7	--	0.144	<0.0005	<0.0005	0.000832	--	0.534	0.723	IGHV5-51	IGHJ4	IGKV3-15	IGKJ2	0.0526	0.0123
BD57-2278	BA.1 + BA.5/BF.7	--	0.0672	0.000768	0.000753	0.00110	--	0.177	0.328	IGHV5-51	IGHJ4	IGKV3-15	IGKJ2	0.0499	0.0092
BD57-2279	BA.1 + BA.5/BF.7	--	0.119	<0.0005	<0.0005	0.000942	--	>10	>10	IGHV5-51	IGHJ3	IGKV3-15	IGKJ1	0.0366	0.0282
BD57-2280	BA.1 + BA.5/BF.7	--	>10	--	--	>10	--	--	>10	IGHV1-18	IGHJ4	IGKV3-15	IGKJ1	0.0302	0.0155
BD57-2281	BA.1 + BA.5/BF.7	--	0.119	0.000808	0.000852	0.00141	--	>10	>10	IGHV5-51	IGHJ3	IGKV3-15	IGKJ1	0.031	0.0251
BD57-2282	BA.1 + BA.5/BF.7	--	0.0264	0.00615	<0.0005	0.000904	--	>10	>10	IGHV2-5	IGHJ4	IGKV3-15	IGKJ4	0.0463	0.0342
BD57-2283	BA.1 + BA.5/BF.7	--	>10	--	--	>10	--	--	>10	IGHV3-30	IGHJ4	IGLV6-57	IGLJ2	0.0378	0.0394
BD57-2284	BA.1 + BA.5/BF.7	--	>10	--	--	>10	--	--	>10	IGHV4-39	IGHJ6	IGLV6-57	IGLJ3	0.0234	0.0272
BD57-2285	BA.1 + BA.5/BF.7	--	>10	--	--	>10	--	--	>10	IGHV4-39	IGHJ6	IGLV6-57	IGLJ2	0.0365	0.0211
BD57-2286	BA.1 + BA.5/BF.7	--	>10	>10	>10	1.75	--	>10	>10	IGHV4-39	IGHJ6	IGLV6-57	IGLJ3	0.0651	0.0091
BD57-2287	BA.1 + BA.5/BF.7	--	>10	0.0333	0.0808	0.0807	--	>10	>10	IGHV5-51	IGHJ2	IGLV6-57	IGLJ2	0.0254	0.0272
BD57-2288	BA.1 + BA.5/BF.7	--	>10	>10	>10	1.40	--	>10	>10	IGHV3-30	IGHJ4	IGLV6-57	IGLJ2	0.0351	0.0152
BD57-2289	BA.1 + BA.5/BF.7	--	>10	--	--	>10	--	--	>10	IGHV4-39	IGHJ6	IGLV6-57	IGLJ2	0.0443	0.0393
BD57-2290	BA.1 + BA.5/BF.7	--	>10	0.00142	0.000888	0.00174	--	>10	0.0264	IGHV1-69-2	IGHJ4	IGLV9-49	IGLJ3	0.105	0.0692
BD57-2291	BA.1 + BA.5/BF.7	--	>10	0.306	0.168	0.298	--	0.384	0.667	IGHV3-13	IGHJ3	IGLV9-49	IGLJ2	0.0376	0.0115
BD57-2292	BA.1 + BA.5/BF.7	--	0.000741	0.00212	0.00253	0.00227	--	>10	>10	IGHV2-5	IGHJ4	IGLV2-14	IGLJ3	0.0475	0.0335
BD57-2293	BA.1 + BA.5/BF.7	--	>10	0.00109	0.00234	0.00254	--	0.00400	0.00411	IGHV4-34	IGHJ3	IGLV2-23	IGLJ3	0.0697	0.0338
BD57-2294	BA.1 + BA.5/BF.7	--	>10	<0.0005	0.00134	<0.0005	--	0.0275	0.0203	IGHV4-34	IGHJ3	IGLV2-23	IGLJ3	0.0375	0.0308
BD57-2295	BA.1 + BA.5/BF.7	--	>10	--	--	>10	--	--	>10	IGHV3-20	IGHJ2	IGLV2-23	IGLJ2	0.0351	0.0274
BD57-2296	BA.1 + BA.5/BF.7	--	>10	0.000957	0.00245	0.00137	--	>10	>10	IGHV5-51	IGHJ4	IGLV2-8	IGLJ1	0.031	0.0215
BD57-2297	BA.1 + BA.5/BF.7	--	>10	--	--	>10	--	--	>10	IGHV1-69	IGHJ5	IGLV2-8	IGLJ1	0.0649	0.0181
BD57-2299	BA.1 + BA.5/BF.7	--	>10	--	--	>10	--	--	>10	IGHV1-69	IGHJ4	IGLV2-11	IGLJ3	0.066	0.0363
BD57-2300	BA.1 + BA.5/BF.7	--	>10	--	--	>10	--	--	>10	IGHV3-9	IGHJ4	IGLV1-44	IGLJ3	0.0602	0.0334
BD57-2301	BA.1 + BA.5/BF.7	--	>10	--	--	>10	--	--	>10	IGHV2-5	IGHJ4	IGLV1-47	IGLJ3	0.0388	0.048
BD57-2302	BA.1 + BA.5/BF.7	--	>10	>10	>10	5.96	--	>10	>10	IGHV1-58	IGHJ6	IGLV1-47	IGLJ2	0.0374	0.0332
BD57-2303	BA.1 + BA.5/BF.7	--	>10	0.000530	0.00365	0.00590	--	0.0614	0.0258	IGHV5-51	IGHJ3	IGLV1-44	IGLJ1	0.0468	0.021
BD57-2304	BA.1 + BA.5/BF.7	--	>10	--	--	>10	--	--	>10	IGHV1-18	IGHJ4	IGLV1-47	IGLJ2	0.0549	0.0302
BD57-2305	BA.1 + BA.5/BF.7	--	>10	<0.0005	0.000741	0.000987	--	0.00352	0.00301	IGHV4-31	IGHJ5	IGLV1-44	IGLJ2	0.038	0.0299
BD57-2306	BA.1 + BA.5/BF.7	--	>10	0.00186	0.000935	0.00163	--	0.0153	0.00680	IGHV3-30-3	IGHJ4	IGLV1-44	IGLJ2	0.0385	0.0393
BD57-2307	BA.1 + BA.5/BF.7	--	0.0246	0.00101	0.00148	0.000985	--	0.00322	0.00458	IGHV1-8	IGHJ4	IGLV1-44	IGLJ2	0.05	0.0265
BD57-2308	BA.1 + BA.5/BF.7	--	0.00588	0.000641	0.00105	0.000955	--	0.00446	0.00290	IGHV1-8	IGHJ4	IGLV1-44	IGLJ2	0.0765	0.0273
BD57-2309	BA.1 + BA.5/BF.7	--	>10	0.00645	0.00229	0.0629	--	0.577	0.216	IGHV3-30-3	IGHJ4	IGLV1-44	IGLJ2	0.0357	0.0274
BD57-2310	BA.1 + BA.5/BF.7	--	0.0351	0.00145	0.00280	0.00236	--	0.0396	0.0201	IGHV1-18	IGHJ4	IGLV1-47	IGLJ2	0.0514	0.0121
BD57-2311	BA.1 + BA.5/BF.7	--	>10	0.493	0.156	0.152	--	>10	1.03	IGHV3-30	IGHJ4	IGLV1-44	IGLJ2	0.0388	0.0332
BD57-2312	BA.1 + BA.5/BF.7	--	>10	0.0192	0.0226	>10	--	>10	1.06	IGHV1-69	IGHJ4	IGLV1-47	IGLJ2	0.0403	0.0337
BD57-2313	BA.1 + BA.5/BF.7	--	0.00700	0.000629	0.000756	0.00796	--	0.741	>10	IGHV1-46	IGHJ4	IGLV1-51	IGLJ2	0.0763	0.0396
BD57-2314	BA.1 + BA.5/BF.7	--	0.174	<0.0005	<0.0005	<0.0005	--	0.00697	>10	IGHV1-69-2	IGHJ4	IGLV1-51	IGLJ2	0.0582	0.0604
BD57-2315	BA.1 + BA.5/BF.7	--	0.355	<0.0005	<0.0005	<0.0005	--	0.00380	>10	IGHV1-69-2	IGHJ4	IGLV1-51	IGLJ2	0.036	0.0395
BD57-2316	BA.1 + BA.5/BF.7	--	0.0742	0.00161	0.00250	0.00149	--	>10	>10	IGHV5-51	IGHJ3	IGLV1-51	IGLJ3	0.049	0.0574
BD57-2317	BA.1 + BA.5/BF.7	--	0.00698	<0.0005	<0.0005	0.00837	--	0.0521	>10	IGHV1-46	IGHJ4	IGLV1-51	IGLJ2	0.0736	0.0423
BD57-2318	BA.1 + BA.5/BF.7	--	0.211	0.899	0.183	1.34	--	>10	>10	IGHV1-69	IGHJ3	IGLV1-40	IGLJ2	0.0392	0.0299
BD57-2319	BA.1 + BA.5/BF.7	--	0.421	0.572	0.155	1.36	--	>10	>10	IGHV1-69	IGHJ1	IGLV1-40	IGLJ3	0.0623	0.0359
BD57-2320	BA.1 + BA.5/BF.7	--	0.328	0.109	0.0262	0.684	--	>10	>10	IGHV1-69	IGHJ4	IGLV1-40	IGLJ2	0.0349	0.018
BD57-2322	BA.1 + BA.5/BF.7	--	>10	--	--	>10	--	--	>10	IGHV3-21	IGHJ4	IGLV1-44	IGLJ1	0.0566	0.0151
BD57-2323	BA.1 + BA.5/BF.7	--	0.0188	0.00202	0.00219	0.0218	--	>10	0.732	IGHV1-69-2	IGHJ5	IGLV7-43	IGLJ2	0.067	0.0393
BD57-2324	BA.1 + BA.5/BF.7	--	>10	0.00171	0.0138	0.00520	--	1.34	0.591	IGHV2-5	IGHJ4	IGLV3-25	IGLJ2	0.033	0.0769
BD57-2325	BA.1 + BA.5/BF.7	--	>10	0.00149	0.0146	0.00991	--	0.456	0.586	IGHV2-5	IGHJ4	IGLV3-25	IGLJ2	0.044	0.0708
BD57-2326	BA.1 + BA.5/BF.7	--	>10	>10	>10	1.19	--	>10	>10	IGHV1-18	IGHJ6	IGLV3-10	IGLJ3	0.0771	0.0656
BD57-2327	BA.1 + BA.5/BF.7	--	>10	<0.0005	0.00178	0.00107	--	0.00915	0.00308	IGHV3-11	IGHJ4	IGLV3-1	IGLJ1	0.0338	0.0596
BD57-2328	BA.1 + BA.5/BF.7	--	1.29	0.288	0.118	0.971	--	>10	>10	IGHV5-51	IGHJ4	IGLV3-19	IGLJ1	0.0312	0.0488
BD57-2329	BA.1 + BA.5/BF.7	--	>10	>10	>10	>10	--	>10	>10	IGHV1-18	IGHJ6	IGLV3-19	IGLJ2	0.0341	0.0396
BD57-2330	BA.1 + BA.5/BF.7	--	0.0599	0.207	0.0938	0.0600	--	0.269	0.279	IGHV3-11	IGHJ6	IGLV3-19	IGLJ3	0.0202	0.0404
BD57-2331	BA.1 + BA.5/BF.7	--	>10	0.00258	0.00114	<0.0005	--	0.0294	0.00438	IGHV3-11	IGHJ4	IGLV3-1	IGLJ1	0.0468	0.0373
BD57-2332	BA.1 + BA.5/BF.7	--	>10	0.0140	0.00538	0.00256	--	0.0707	0.0582	IGHV2-70	IGHJ6	IGLV3-25	IGLJ2	0.0303	0.0554
BD57-2333	BA.1 + BA.5/BF.7	--	>10	0.00189	0.0158	0.0154	--	0.806	1.22	IGHV2-70	IGHJ4	IGLV3-25	IGLJ2	0.0297	0.0427
BD57-2334	BA.1 + BA.5/BF.7	--	>10	0.000997	0.000627	0.00752	--	0.0204	>10	IGHV3-74	IGHJ4	IGLV3-25	IGLJ1	0.0676	0.0492
BD57-2335	BA.1 + BA.5/BF.7	--	>10	0.00142	0.000976	0.00882	--	0.0430	>10	IGHV3-74	IGHJ4	IGLV3-25	IGLJ1	0.073	0.0462
BD57-2336	BA.1 + BA.5/BF.7	--	>10	0.00161	0.000746	0.0574	--	0.0943	>10	IGHV3-74	IGHJ4	IGLV3-25	IGLJ1	0.0459	0.0277
BD57-2337	BA.1 + BA.5/BF.7	--	>10	0.00119	0.00126	0.00108	--	0.114	0.143	IGHV2-70	IGHJ4	IGLV3-25	IGLJ2	0.0354	0.0336
BD57-2338	BA.1 + BA.5/BF.7	--	>10	0.00102	0.00351	0.00241	--	>10	>10	IGHV2-70	IGHJ4	IGLV3-25	IGLJ2	0.03	0.0367
BD57-2339	BA.1 + BA.5/BF.7	--	>10	<0.0005	0.00372	0.00210	--	0.399	0.588	IGHV3-30	IGHJ4	IGLV3-25	IGLJ3	0.0659	0.034
BD57-2340	BA.1 + BA.5/BF.7	--	>10	0.436	0.792	0.926	--	>10	>10	IGHV1-69	IGHJ5	IGLV3-9	IGLJ1	0.0981	0.0721
BD57-2341	BA.1 + BA.5/BF.7	--	0.0653	0.000557	0.00946	0.0108	--	>10	>10	IGHV1-8	IGHJ1	IGLV3-9	IGLJ2	0.0531	0.0253
BD57-2342	BA.1 + BA.5/BF.7	--	>10	0.00148	0.00417	0.00229	--	0.0430	0.0296	IGHV2-70	IGHJ6	IGLV3-25	IGLJ2	0.0569	0.0892
BD57-2343	BA.1 + BA.5/BF.7	--	>10	0.00211	0.00386	0.00287	--	0.106	0.104	IGHV2-70	IGHJ6	IGLV3-25	IGLJ2	0.0355	0.0369
BD57-2344	BA.1 + BA.5/BF.7	--	>10	--	--	>10	--	--	>10	IGHV3-7	IGHJ4	IGLV3-25	IGLJ2	0.0185	0.0246
BD57-2345	BA.1 + BA.5/BF.7	--	>10	--	--	>10	--	--	>10	IGHV2-26	IGHJ5	IGLV3-25	IGLJ2	0.0186	0.0314
BD57-2346	BA.1 + BA.5/BF.7	--	>10	--	--	>10	--	--	>10	IGHV2-26	IGHJ5	IGLV3-25	IGLJ2	0.0346	0.0503
BD57-2347	BA.1 + BA.5/BF.7	--	>10	0.000866	0.000975	0.00111	--	0.0617	0.00880	IGHV2-70	IGHJ6	IGLV3-25	IGLJ3	0.0492	0.0337
BD57-2348	BA.1 + BA.5/BF.7	--	>10	0.00114	0.00390	0.00131	--	>10	>10	IGHV2-70	IGHJ4	IGLV3-25	IGLJ2	0.0245	0.0429
BD57-2350	BA.1 + BA.5/BF.7	--	>10	<0.0005	0.000909	0.000792	--	0.00678	0.0128	IGHV2-70	IGHJ6	IGLV3-25	IGLJ2	0.041	0.0369
BD57-2351	BA.1 + BA.5/BF.7	--	>10	0.00144	0.00594	0.00259	--	0.672	0.553	IGHV2-70	IGHJ4	IGLV3-25	IGLJ2	0.0412	0.0338
BD57-2352	BA.1 + BA.5/BF.7	--	>10	<0.0005	0.000768	0.000834	--	0.0167	0.0165	IGHV2-70	IGHJ6	IGLV3-25	IGLJ3	0.0437	0.0462
BD57-2353	BA.1 + BA.5/BF.7	--	>10	<0.0005	0.00114	0.000941	--	0.0475	0.0336	IGHV2-70	IGHJ4	IGLV3-25	IGLJ2	0.0245	0.0338
BD57-2354	BA.1 + BA.5/BF.7	--	>10	<0.0005	0.00127	<0.0005	--	>10	>10	IGHV2-70	IGHJ4	IGLV3-25	IGLJ2	0.0247	0.0215
BD57-2355	BA.1 + BA.5/BF.7	--	>10	0.0101	0.00988	0.00518	--	>10	>10	IGHV2-70	IGHJ6	IGLV3-25	IGLJ2	0.025	0.04
BD57-2356	BA.1 + BA.5/BF.7	--	>10	<0.0005	0.000842	<0.0005	--	0.0165	0.0216	IGHV2-70	IGHJ4	IGLV3-25	IGLJ3	0.0272	0.0341
BD57-2357	BA.1 + BA.5/BF.7	--	>10	>10	>10	0.417	--	>10	>10	IGHV3-30	IGHJ2	IGLV3-25	IGLJ2	0.0687	0.0585
BD57-2358	BA.1 + BA.5/BF.7	--	0.0236	0.000527	<0.0005	0.000965	--	0.0365	>10	IGHV3-11	IGHJ4	IGLV3-1	IGLJ2	0.0279	0.0157
BD57-2359	BA.1 + BA.5/BF.7	--	>10	0.00227	0.0105	0.00403	--	>10	>10	IGHV4-59	IGHJ4	IGLV3-25	IGLJ2	0.0277	0.0431
BD57-2360	BA.1 + BA.5/BF.7	--	>10	0.00174	0.00308	0.00254	--	0.126	0.130	IGHV2-70	IGHJ4	IGLV3-25	IGLJ2	0.0409	0.0338
BD57-2361	BA.1 + BA.5/BF.7	--	>10	0.000650	0.000698	0.00213	--	0.0255	>10	IGHV4-59	IGHJ3	IGLV3-1	IGLJ2	0.0826	0.0596
BD57-2362	BA.1 + BA.5/BF.7	--	0.00603	<0.0005	0.00109	<0.0005	--	0.00758	>10	IGHV3-11	IGHJ4	IGLV3-1	IGLJ2	0.0482	0.0535
BD57-2363	BA.1 + BA.5/BF.7	--	>10	0.000872	0.00173	0.000764	--	0.248	0.160	IGHV2-70	IGHJ4	IGLV3-25	IGLJ2	0.0302	0.0341
BD57-2364	BA.1 + BA.5/BF.7	--	>10	--	--	>10	--	--	>10	IGHV3-9	IGHJ5	IGLV3-21	IGLJ1	0.0495	0.0366
BD57-2365	BA.1 + BA.5/BF.7	--	>10	--	--	>10	--	--	>10	IGHV5-51	IGHJ4	IGLV3-21	IGLJ3	0.0423	0.0185
BD57-2366	BA.1 + BA.5/BF.7	--	>10	--	--	>10	--	--	>10	IGHV1-8	IGHJ2	IGLV3-21	IGLJ2	0.022	0.0366
BD57-2060	BA.2 + BA.5/BF.7	--	>10	--	--	>10	--	--	>10	IGHV3-48	IGHJ6	IGKV1-6	IGKJ1	0.0242	0.0062
BD57-2061	BA.2 + BA.5/BF.7	--	0.328	0.285	0.0413	>10	--	0.711	0.976	IGHV1-69	IGHJ4	IGKV1-12	IGKJ5	0.0405	0.0217
BD57-2062	BA.2 + BA.5/BF.7	--	>10	0.0186	0.00658	0.0142	--	0.837	0.135	IGHV3-53	IGHJ6	IGKV1-33	IGKJ2	0.0313	0.0338
BD57-2063	BA.2 + BA.5/BF.7	--	>10	>10	0.0455	0.0251	--	0.403	0.370	IGHV5-51	IGHJ4	IGKV1-39	IGKJ2	0.0251	0.0312
BD57-2064	BA.2 + BA.5/BF.7	--	>10	>10	0.00114	0.00163	--	0.00513	0.00628	IGHV5-51	IGHJ4	IGKV1-39	IGKJ2	0.0335	0.0436
BD57-2065	BA.2 + BA.5/BF.7	--	>10	0.00457	0.00587	0.0214	--	0.206	0.173	IGHV3-53	IGHJ3	IGKV1-33	IGKJ1	0.0475	0.0313
BD57-2066	BA.2 + BA.5/BF.7	--	>10	0.00753	0.0262	0.0211	--	>10	>10	IGHV1-2	IGHJ4	IGKV1-33	IGKJ4	0.0194	0.0345
BD57-2067	BA.2 + BA.5/BF.7	--	>10	--	--	>10	--	--	>10	IGHV3-30	IGHJ4	IGKV1-33	IGKJ5	0.0135	0.0155
BD57-2068	BA.2 + BA.5/BF.7	--	0.0223	0.00216	0.00391	0.00324	--	0.128	0.0398	IGHV3-66	IGHJ4	IGKV1-33	IGKJ1	0.035	0.0185
BD57-2069	BA.2 + BA.5/BF.7	--	0.0198	0.00182	0.00247	0.00156	--	0.0581	0.0278	IGHV3-53	IGHJ1	IGKV1-33	IGKJ1	0.0554	0.0342
BD57-2070	BA.2 + BA.5/BF.7	--	0.0169	0.000764	0.000896	0.000981	--	0.00474	0.00320	IGHV3-53	IGHJ4	IGKV1-33	IGKJ1	0.063	0.0338
BD57-2071	BA.2 + BA.5/BF.7	--	>10	0.00652	0.00473	0.00403	--	0.321	0.0814	IGHV3-53	IGHJ6	IGKV1-33	IGKJ2	0.0202	0.0155
BD57-2072	BA.2 + BA.5/BF.7	--	>10	0.00432	0.00476	0.00302	--	0.0595	0.0350	IGHV3-66	IGHJ6	IGKV1-33	IGKJ1	0.0519	0.0248
BD57-2073	BA.2 + BA.5/BF.7	--	0.0182	0.00238	0.00372	0.00295	--	0.00924	0.0104	IGHV3-66	IGHJ6	IGKV1-33	IGKJ2	0.0696	0.0462
BD57-2074	BA.2 + BA.5/BF.7	--	>10	>10	0.00780	0.00705	--	>10	>10	IGHV3-15	IGHJ6	IGKV1-33	IGKJ3	0.0331	0.0345
BD57-2075	BA.2 + BA.5/BF.7	--	>10	>10	0.000802	0.000559	--	>10	>10	IGHV1-69	IGHJ5	IGKV1-33	IGKJ2	0.0375	0.0308
BD57-2076	BA.2 + BA.5/BF.7	--	>10	>10	<0.0005	<0.0005	--	>10	>10	IGHV1-69	IGHJ5	IGKV1-33	IGKJ2	0.04	0.0062
BD57-2077	BA.2 + BA.5/BF.7	--	>10	>10	0.00190	0.00218	--	>10	>10	IGHV3-30	IGHJ3	IGKV1-33	IGKJ2	0.0297	0.0062
BD57-2078	BA.2 + BA.5/BF.7	--	>10	0.958	0.156	0.0912	--	0.167	0.104	IGHV3-43	IGHJ4	IGKV1-39	IGKJ1	0.0325	0.0342
BD57-2079	BA.2 + BA.5/BF.7	--	>10	--	--	>10	--	--	>10	IGHV1-2	IGHJ6	IGKV1-39	IGKJ4	0.0231	0.0186
BD57-2080	BA.2 + BA.5/BF.7	--	>10	0.00261	0.000905	0.00111	--	5.04	2.06	IGHV1-24	IGHJ4	IGKV1-39	IGKJ2	0.0307	0.0213
BD57-2081	BA.2 + BA.5/BF.7	--	>10	8.55	0.000736	<0.0005	--	0.000964	0.00189	IGHV5-51	IGHJ3	IGKV1-39	IGKJ1	0.0307	0.0186
BD57-2082	BA.2 + BA.5/BF.7	--	>10	0.00182	0.00517	0.0268	--	0.0902	0.0536	IGHV3-9	IGHJ4	IGKV1-39	IGKJ4	0.0247	0.0348
BD57-2083	BA.2 + BA.5/BF.7	--	>10	0.00290	0.00167	0.0116	--	0.0971	0.0601	IGHV3-9	IGHJ6	IGKV1-39	IGKJ2	0.0217	0.0155
BD57-2084	BA.2 + BA.5/BF.7	--	1.94	0.00262	0.00492	0.0505	--	>10	>10	IGHV3-53	IGHJ5	IGKV1-39	IGKJ2	0.0536	0.0435
BD57-2085	BA.2 + BA.5/BF.7	--	>10	--	--	>10	--	--	>10	IGHV3-7	IGHJ4	IGKV1-5	IGKJ1	0.0479	0.0311
BD57-2086	BA.2 + BA.5/BF.7	--	0.0135	0.00203	0.00264	0.00525	--	0.132	0.0747	IGHV2-70	IGHJ6	IGKV2-28	IGKJ4	0.0465	0.0059
BD57-2087	BA.2 + BA.5/BF.7	--	>10	>10	0.00104	0.000940	--	0.00262	0.00403	IGHV5-51	IGHJ3	IGKV1-39	IGKJ2	0.0279	0.0313
BD57-2088	BA.2 + BA.5/BF.7	--	>10	--	--	>10	--	--	>10	IGHV1-24	IGHJ5	IGKV4-1	IGKJ4	0.0436	0.0382
BD57-2089	BA.2 + BA.5/BF.7	--	>10	<0.0005	<0.0005	0.000688	--	>10	>10	IGHV5-51	IGHJ4	IGKV2-30	IGKJ4	0.0479	0.0415
BD57-2090	BA.2 + BA.5/BF.7	--	>10	<0.0005	0.00125	0.000706	--	0.110	0.0938	IGHV1-69	IGHJ6	IGKV2-30	IGKJ1	0.0491	0.0059
BD57-2091	BA.2 + BA.5/BF.7	--	>10	0.000845	0.000639	<0.0005	--	>10	>10	IGHV5-51	IGHJ3	IGKV3D-20	IGKJ3	0.0225	0.0435
BD57-2092	BA.2 + BA.5/BF.7	--	>10	0.0524	0.00408	0.0229	--	0.0277	0.0287	IGHV3-30	IGHJ4	IGKV3-11	IGKJ4	0.0258	0.0155
BD57-2093	BA.2 + BA.5/BF.7	--	>10	0.0160	0.0114	0.00720	--	0.0250	0.0140	IGHV2-5	IGHJ4	IGKV3-11	IGKJ3	0.0638	0.0308
BD57-2094	BA.2 + BA.5/BF.7	--	>10	--	--	>10	--	--	>10	IGHV1-46	IGHJ4	IGKV3-11	IGKJ3	0.0218	0.0061
BD57-2095	BA.2 + BA.5/BF.7	--	>10	--	--	>10	--	--	>10	IGHV3-9	IGHJ4	IGKV6-21	IGKJ4	0.0275	0.0308
BD57-2096	BA.2 + BA.5/BF.7	--	>10	0.00398	0.00833	0.00529	--	>10	>10	IGHV5-51	IGHJ3	IGKV3-20	IGKJ4	0.0394	0.0708
BD57-2097	BA.2 + BA.5/BF.7	--	>10	>10	1.27	1.20	--	1.65	1.30	IGHV4-31	IGHJ6	IGKV3-20	IGKJ1	0.0403	0.0154
BD57-2098	BA.2 + BA.5/BF.7	--	0.0615	0.00137	0.00278	0.00372	--	>10	>10	IGHV5-51	IGHJ3	IGKV3-20	IGKJ4	0.0394	0.0217
BD57-2099	BA.2 + BA.5/BF.7	--	>10	>10	1.32	1.24	--	>10	>10	IGHV1-69	IGHJ6	IGKV3-20	IGKJ2	0.0682	0.0092
BD57-2100	BA.2 + BA.5/BF.7	--	>10	0.00314	0.00537	0.00762	--	>10	>10	IGHV2-26	IGHJ6	IGKV3-20	IGKJ3	0.0354	0.0559
BD57-2101	BA.2 + BA.5/BF.7	--	>10	--	--	>10	--	--	>10	IGHV3-9	IGHJ4	IGKV3-15	IGKJ2	0.0351	0.028
BD57-2102	BA.2 + BA.5/BF.7	--	0.0184	<0.0005	0.000664	0.000839	--	>10	>10	IGHV5-51	IGHJ3	IGKV3-15	IGKJ1	0.0394	0.0338
BD57-2103	BA.2 + BA.5/BF.7	--	>10	0.113	0.0134	0.00871	--	0.0162	0.0156	IGHV2-5	IGHJ4	IGKV3-15	IGKJ5	0.0186	0.0215
BD57-2104	BA.2 + BA.5/BF.7	--	>10	--	--	>10	--	--	>10	IGHV3-9	IGHJ4	IGKV3-15	IGKJ4	0.0297	0.0183
BD57-2105	BA.2 + BA.5/BF.7	--	>10	--	--	>10	--	--	>10	IGHV3-9	IGHJ1	IGKV3-15	IGKJ4	0.0081	0.0122
BD57-2106	BA.2 + BA.5/BF.7	--	>10	<0.0005	<0.0005	<0.0005	--	>10	>10	IGHV5-51	IGHJ4	IGKV3-15	IGKJ2	0.0254	0.0155
BD57-2107	BA.2 + BA.5/BF.7	--	>10	--	--	>10	--	--	>10	IGHV2-5	IGHJ4	IGKV3-15	IGKJ2	0.0237	0.0217
BD57-2108	BA.2 + BA.5/BF.7	--	>10	0.00260	<0.0005	<0.0005	--	>10	>10	IGHV2-5	IGHJ4	IGKV3-15	IGKJ3	0.0467	0.0373
BD57-2109	BA.2 + BA.5/BF.7	--	>10	>10	0.964	0.461	--	1.33	1.54	IGHV1-69	IGHJ4	IGKV3-15	IGKJ1	0.0549	0.0217
BD57-2110	BA.2 + BA.5/BF.7	--	0.326	0.00247	<0.0005	<0.0005	--	>10	>10	IGHV2-5	IGHJ4	IGKV3-15	IGKJ3	0.0275	0.0248
BD57-2111	BA.2 + BA.5/BF.7	--	>10	>10	0.864	0.581	--	0.979	1.37	IGHV1-2	IGHJ4	IGKV3-20	IGKJ1	0.0604	0.0183
BD57-2112	BA.2 + BA.5/BF.7	--	>10	>10	0.365	0.230	--	0.350	0.298	IGHV4-39	IGHJ5	IGLV6-57	IGLJ2	0.036	0.0332
BD57-2113	BA.2 + BA.5/BF.7	--	>10	>10	0.833	0.327	--	0.924	0.761	IGHV4-39	IGHJ5	IGLV6-57	IGLJ3	0.0554	0.0122
BD57-2114	BA.2 + BA.5/BF.7	--	>10	--	--	>10	--	--	>10	IGHV4-38-2	IGHJ4	IGLV6-57	IGLJ2	0.0458	0.0212
BD57-2115	BA.2 + BA.5/BF.7	--	>10	>10	0.288	0.248	--	0.577	0.338	IGHV4-31	IGHJ5	IGLV6-57	IGLJ3	0.0139	0.0151
BD57-2116	BA.2 + BA.5/BF.7	--	>10	>10	1.38	1.36	--	2.20	1.84	IGHV4-39	IGHJ4	IGLV6-57	IGLJ3	0.0637	0.0243
BD57-2117	BA.2 + BA.5/BF.7	--	1.10	>10	0.144	0.220	--	1.33	0.570	IGHV1-18	IGHJ4	IGLV6-57	IGLJ3	0.0595	0.0211
BD57-2118	BA.2 + BA.5/BF.7	--	>10	0.00477	0.00175	0.00134	--	0.00579	0.00390	IGHV3-15	IGHJ4	IGLV6-57	IGLJ3	0.0202	0.0241
BD57-2119	BA.2 + BA.5/BF.7	--	>10	0.00271	<0.0005	0.000831	--	>10	>10	IGHV3-15	IGHJ4	IGLV6-57	IGLJ2	0.0578	0.048
BD57-2120	BA.2 + BA.5/BF.7	--	>10	>10	0.636	0.485	--	0.443	0.588	IGHV4-4	IGHJ4	IGLV6-57	IGLJ1	0.0659	0.0302
BD57-2121	BA.2 + BA.5/BF.7	--	>10	--	--	>10	--	--	>10	IGHV4-59	IGHJ4	IGLV6-57	IGLJ3	0.0282	0.0453
BD57-2122	BA.2 + BA.5/BF.7	--	0.0256	0.000705	<0.0005	<0.0005	--	0.0274	0.0129	IGHV2-5	IGHJ4	IGLV1-47	IGLJ3	0.0443	0.0419
BD57-2123	BA.2 + BA.5/BF.7	--	>10	--	--	>10	--	--	>10	IGHV3-30	IGHJ4	IGLV7-46	IGLJ2	0.0266	0.003
BD57-2124	BA.2 + BA.5/BF.7	--	>10	0.00832	0.00522	0.228	--	>10	>10	IGHV1-69-2	IGHJ4	IGLV9-49	IGLJ3	0.0111	0.0199
BD57-2125	BA.2 + BA.5/BF.7	--	>10	--	--	>10	--	--	>10	IGHV3-9	IGHJ4	IGLV9-49	IGLJ3	0.0341	0.0228
BD57-2126	BA.2 + BA.5/BF.7	--	>10	0.000926	<0.0005	0.000528	--	0.684	2.22	IGHV1-69-2	IGHJ4	IGLV2-23	IGLJ2	0.0412	0.0215
BD57-2127	BA.2 + BA.5/BF.7	--	>10	0.00458	0.00133	0.0244	--	>10	>10	IGHV4-31	IGHJ6	IGLV2-14	IGLJ3	0.0625	0.0445
BD57-2128	BA.2 + BA.5/BF.7	--	>10	0.000729	0.00106	0.00298	--	0.00386	0.00306	IGHV1-8	IGHJ5	IGLV2-14	IGLJ3	0.0353	0.0483
BD57-2129	BA.2 + BA.5/BF.7	--	>10	0.00190	0.000711	0.0155	--	>10	>10	IGHV1-69-2	IGHJ4	IGLV2-23	IGLJ3	0.0134	0.015
BD57-2130	BA.2 + BA.5/BF.7	--	>10	--	--	>10	--	--	>10	IGHV5-51	IGHJ3	IGLV2-14	IGLJ3	0.0218	0.0514
BD57-2131	BA.2 + BA.5/BF.7	--	>10	0.00178	0.000762	0.0613	--	0.0215	0.0142	IGHV4-4	IGHJ4	IGLV2-14	IGLJ2	0.0163	0.0509
BD57-2132	BA.2 + BA.5/BF.7	--	>10	--	--	>10	--	--	>10	IGHV1-8	IGHJ4	IGLV2-23	IGLJ3	0.0105	0.0122
BD57-2133	BA.2 + BA.5/BF.7	--	>10	<0.0005	0.000608	<0.0005	--	0.00134	0.00110	IGHV4-4	IGHJ1	IGLV2-14	IGLJ1	0.0493	0.0298
BD57-2134	BA.2 + BA.5/BF.7	--	>10	0.00179	0.00197	0.0327	--	>10	>10	IGHV1-24	IGHJ2	IGLV2-14	IGLJ3	0.0297	0.0356
BD57-2135	BA.2 + BA.5/BF.7	--	>10	0.000850	0.00144	0.00126	--	0.0299	0.0320	IGHV4-31	IGHJ1	IGLV2-23	IGLJ3	0.0272	0.0338
BD57-2136	BA.2 + BA.5/BF.7	--	>10	0.000507	0.00110	<0.0005	--	0.0108	0.0167	IGHV1-8	IGHJ6	IGLV2-23	IGLJ2	0.0434	0.0338
BD57-2137	BA.2 + BA.5/BF.7	--	>10	0.00195	0.000726	0.00236	--	>10	>10	IGHV1-69	IGHJ6	IGLV2-23	IGLJ3	0.043	0.0237
BD57-2138	BA.2 + BA.5/BF.7	--	>10	0.00368	0.00439	0.00764	--	0.0140	0.00548	IGHV4-31	IGHJ4	IGLV2-14	IGLJ2	0.0293	0.0423
BD57-2139	BA.2 + BA.5/BF.7	--	>10	0.00101	0.00248	0.00916	--	0.00911	0.0190	IGHV4-31	IGHJ4	IGLV2-14	IGLJ2	0.0536	0.0491
BD57-2140	BA.2 + BA.5/BF.7	--	>10	<0.0005	0.000748	<0.0005	--	0.00182	0.00132	IGHV4-4	IGHJ4	IGLV2-14	IGLJ3	0.0514	0.0427
BD57-2141	BA.2 + BA.5/BF.7	--	>10	1.07	0.110	0.0817	--	0.257	0.172	IGHV3-13	IGHJ4	IGLV2-8	IGLJ1	0.0455	0.0211
BD57-2142	BA.2 + BA.5/BF.7	--	>10	0.000513	0.00112	0.00131	--	0.0161	0.00976	IGHV1-69-2	IGHJ4	IGLV2-11	IGLJ2	0.0405	0.0154
BD57-2143	BA.2 + BA.5/BF.7	--	>10	0.000731	0.000964	0.00391	--	0.127	0.00244	IGHV1-46	IGHJ3	IGLV2-11	IGLJ3	0.0323	0.0151
BD57-2144	BA.2 + BA.5/BF.7	--	>10	0.0543	0.0856	0.105	--	0.171	0.182	IGHV4-61	IGHJ3	IGLV2-14	IGLJ2	0.0234	0.0212
BD57-2145	BA.2 + BA.5/BF.7	--	>10	>10	0.0719	0.110	--	0.727	1.05	IGHV1-2	IGHJ4	IGLV2-14	IGLJ2	0.0714	0.0578
BD57-2146	BA.2 + BA.5/BF.7	--	>10	>10	0.00179	0.00116	--	>10	>10	IGHV3-43	IGHJ4	IGLV1-47	IGLJ3	0.0408	0.0206
BD57-2147	BA.2 + BA.5/BF.7	--	0.936	0.0404	0.0113	0.00959	--	>10	>10	IGHV5-51	IGHJ4	IGLV1-44	IGLJ3	0.0452	0.021
BD57-2148	BA.2 + BA.5/BF.7	--	0.0442	0.00803	0.00400	0.00468	--	>10	>10	IGHV5-51	IGHJ4	IGLV1-44	IGLJ2	0.0225	0.0271
BD57-2149	BA.2 + BA.5/BF.7	--	0.0892	0.00442	0.00195	0.00326	--	>10	>10	IGHV2-5	IGHJ4	IGLV1-47	IGLJ3	0.0111	0.0211
BD57-2150	BA.2 + BA.5/BF.7	--	0.0282	0.000940	<0.0005	0.174	--	>10	>10	IGHV1-46	IGHJ3	IGLV1-51	IGLJ2	0.0514	0.0181
BD57-2151	BA.2 + BA.5/BF.7	--	>10	>10	0.681	1.22	--	1.08	1.20	IGHV5-10-1	IGHJ6	IGLV1-51	IGLJ3	0.0238	0.0211
BD57-2152	BA.2 + BA.5/BF.7	--	>10	--	--	>10	--	--	>10	IGHV4-39	IGHJ5	IGLV1-40	IGLJ3	0.034	0.015
BD57-2153	BA.2 + BA.5/BF.7	--	>10	0.000990	0.000991	0.000857	--	0.00603	0.00370	IGHV1-69	IGHJ6	IGLV1-40	IGLJ3	0.0481	0.0271
BD57-2154	BA.2 + BA.5/BF.7	--	>10	>10	>10	0.00111	--	>10	>10	IGHV4-61	IGHJ4	IGLV1-40	IGLJ2	0.0416	0.0297
BD57-2155	BA.2 + BA.5/BF.7	--	>10	<0.0005	<0.0005	<0.0005	--	0.00138	0.000769	IGHV4-61	IGHJ4	IGLV1-40	IGLJ2	0.0332	0.0179
BD57-2156	BA.2 + BA.5/BF.7	--	>10	--	--	>10	--	--	>10	IGHV1-69	IGHJ6	IGLV1-40	IGLJ2	0.0488	0.0332
BD57-2157	BA.2 + BA.5/BF.7	--	0.00428	<0.0005	0.00119	<0.0005	--	0.0144	0.0140	IGHV1-46	IGHJ3	IGLV1-40	IGLJ3	0.0447	0.012
BD57-2158	BA.2 + BA.5/BF.7	--	1.77	0.281	0.0364	0.728	--	>10	>10	IGHV1-46	IGHJ4	IGLV1-40	IGLJ2	0.0378	0.012
BD57-2159	BA.2 + BA.5/BF.7	--	0.0615	0.0168	0.0173	0.0122	--	0.858	0.840	IGHV1-46	IGHJ4	IGLV1-40	IGLJ2	0.0756	0.03
BD57-2160	BA.2 + BA.5/BF.7	--	0.701	0.755	0.860	0.892	--	2.20	1.48	IGHV5-51	IGHJ4	IGLV1-44	IGLJ3	0.0282	0.021
BD57-2161	BA.2 + BA.5/BF.7	--	>10	0.0458	<0.0005	<0.0005	--	>10	>10	IGHV2-70	IGHJ4	IGLV1-44	IGLJ1	0.0436	0.0393
BD57-2163	BA.2 + BA.5/BF.7	--	>10	<0.0005	0.000690	0.000828	--	0.0126	0.0145	IGHV2-70	IGHJ6	IGLV3-25	IGLJ2	0.0191	0.0338
BD57-2164	BA.2 + BA.5/BF.7	--	>10	>10	0.742	0.762	--	0.677	>10	IGHV4-38-2	IGHJ4	IGLV3-21	IGLJ3	0.0162	0.0122
BD57-2165	BA.2 + BA.5/BF.7	--	>10	0.323	0.280	0.416	--	0.520	>10	IGHV4-38-2	IGHJ5	IGLV3-21	IGLJ3	0.0324	0.0366
BD57-2166	BA.2 + BA.5/BF.7	--	>10	>10	>10	0.00165	--	>10	>10	IGHV3-9	IGHJ4	IGLV3-21	IGLJ1	0.0134	0.031
BD57-2167	BA.2 + BA.5/BF.7	--	0.00985	0.00260	0.00360	0.00366	--	0.00770	0.00363	IGHV3-66	IGHJ6	IGLV3-21	IGLJ1	0.0427	0.0457
BD57-2168	BA.2 + BA.5/BF.7	--	>10	0.0201	0.00496	0.00384	--	0.564	0.262	IGHV3-13	IGHJ2	IGLV3-21	IGLJ2	0.0223	0.0181
BD57-2169	BA.2 + BA.5/BF.7	--	>10	0.00129	<0.0005	<0.0005	--	0.00883	0.0132	IGHV3-23	IGHJ3	IGLV3-21	IGLJ1	0.039	0.0215
BD57-2170	BA.2 + BA.5/BF.7	--	1.71	0.710	1.04	1.17	--	>10	>10	IGHV5-51	IGHJ4	IGKV1-13	IGKJ2	0.0307	0.0248
BD57-2171	BA.2 + BA.5/BF.7	--	>10	--	--	>10	--	--	>10	IGHV5-51	IGHJ4	IGKV1-13	IGKJ2	0.0282	0.0217
BD57-2172	BA.2 + BA.5/BF.7	--	>10	>10	>10	>10	--	>10	>10	IGHV3-23	IGHJ4	IGKV1-13	IGKJ4	0.0275	0.0248
BD57-2173	BA.2 + BA.5/BF.7	--	0.0108	0.267	0.0316	0.0281	--	>10	>10	IGHV2-5	IGHJ3	IGKV1-39	IGKJ2	0.0293	0.0154
BD57-2174	BA.2 + BA.5/BF.7	--	>10	>10	>10	>10	--	>10	>10	IGHV3-30	IGHJ4	IGKV1-33	IGKJ3	0.0495	0.0621
BD57-2175	BA.2 + BA.5/BF.7	--	>10	>10	0.825	>10	--	>10	>10	IGHV3-33	IGHJ4	IGKV1-33	IGKJ4	0.03	0.0279
BD57-2176	BA.2 + BA.5/BF.7	--	>10	>10	>10	>10	--	>10	>10	IGHV3-33	IGHJ4	IGKV1-5	IGKJ2	0.0357	0.0348
BD57-2177	BA.2 + BA.5/BF.7	--	>10	--	--	>10	--	--	>10	IGHV4-59	IGHJ6	IGKV1-39	IGKJ1	0.0556	0.0528
BD57-2178	BA.2 + BA.5/BF.7	--	>10	0.0994	0.172	0.289	--	1.08	0.399	IGHV3-53	IGHJ4	IGKV1-33	IGKJ2	0.0491	0.0215
BD57-2179	BA.2 + BA.5/BF.7	--	0.0177	0.00409	0.00368	0.00364	--	0.131	0.0719	IGHV3-53	IGHJ4	IGKV1-33	IGKJ5	0.043	0.0596
BD57-2180	BA.2 + BA.5/BF.7	--	>10	--	--	>10	--	--	>10	IGHV3-33	IGHJ4	IGKV1-33	IGKJ4	0.0244	0.0155
BD57-2181	BA.2 + BA.5/BF.7	--	>10	--	--	>10	--	--	>10	IGHV1-69	IGHJ4	IGKV1-33	IGKJ2	0.0696	0.0342
BD57-2182	BA.2 + BA.5/BF.7	--	0.0123	0.000943	0.000827	0.0204	--	>10	>10	IGHV3-15	IGHJ3	IGKV1-39	IGKJ4	0.0372	0.0186
BD57-2183	BA.2 + BA.5/BF.7	--	0.00804	0.00172	0.00256	0.00946	--	0.0524	0.0778	IGHV3-7	IGHJ6	IGKV1-39	IGKJ4	0.026	0.0242
BD57-2184	BA.2 + BA.5/BF.7	--	>10	--	--	>10	--	--	>10	IGHV3-9	IGHJ4	IGKV1D-12	IGKJ3	0.0412	0.0469
BD57-2185	BA.2 + BA.5/BF.7	--	>10	--	--	>10	--	--	>10	IGHV4-39	IGHJ6	IGKV3-20	IGKJ1	0.0661	0.0244
BD57-2186	BA.2 + BA.5/BF.7	--	0.0842	0.00618	0.00184	0.00144	--	>10	>10	IGHV2-5	IGHJ4	IGKV3-15	IGKJ4	0.0165	0.0124
BD57-2187	BA.2 + BA.5/BF.7	--	0.0297	0.00199	<0.0005	<0.0005	--	>10	>10	IGHV2-5	IGHJ4	IGKV3-15	IGKJ3	0.0495	0.0311
BD57-2188	BA.2 + BA.5/BF.7	--	0.0107	0.000946	0.000925	0.000724	--	>10	>10	IGHV2-5	IGHJ4	IGKV3-15	IGKJ3	0.047	0.0435
BD57-2189	BA.2 + BA.5/BF.7	--	0.0192	0.00107	<0.0005	<0.0005	--	>10	>10	IGHV2-5	IGHJ4	IGKV3-15	IGKJ3	0.0357	0.028
BD57-2190	BA.2 + BA.5/BF.7	--	0.129	0.226	0.0626	0.572	--	4.37	4.03	IGHV1-69	IGHJ5	IGLV1-40	IGLJ3	0.0323	0.024
BD57-2191	BA.2 + BA.5/BF.7	--	0.00342	0.00385	0.00752	0.00233	--	>10	>10	IGHV3-15	IGHJ6	IGLV2-14	IGLJ1	0.0656	0.0569
BD57-2192	BA.2 + BA.5/BF.7	--	>10	--	--	>10	--	--	>10	IGHV2-5	IGHJ5	IGLV1-36	IGLJ3	0.0456	0.0151
BD57-2193	BA.2 + BA.5/BF.7	--	0.00243	<0.0005	<0.0005	0.573	--	>10	>10	IGHV4-31	IGHJ4	IGLV2-11	IGLJ2	0.0556	0.0369
BD57-2194	BA.2 + BA.5/BF.7	--	0.000793	0.00444	<0.0005	0.000856	--	>10	>10	IGHV1-69	IGHJ6	IGLV1-44	IGLJ3	0.0417	0.0363
BD57-2195	BA.2 + BA.5/BF.7	--	0.00937	<0.0005	<0.0005	0.000594	--	0.537	0.324	IGHV2-5	IGHJ4	IGLV1-47	IGLJ3	0.0388	0.0332
BD57-2196	BA.2 + BA.5/BF.7	--	0.208	>10	>10	0.00781	--	>10	>10	IGHV3-66	IGHJ6	IGLV1-44	IGLJ2	0.0325	0.0151
BD57-2197	BA.2 + BA.5/BF.7	--	0.0157	0.000553	<0.0005	0.000517	--	>10	>10	IGHV2-5	IGHJ4	IGLV1-47	IGLJ3	0.0504	0.0176
BD57-2198	BA.2 + BA.5/BF.7	--	0.422	0.146	0.340	0.361	--	0.368	0.336	IGHV5-51	IGHJ5	IGLV1-44	IGLJ2	0.0249	0.0151
BD57-2199	BA.2 + BA.5/BF.7	--	0.430	0.280	0.371	0.323	--	0.286	0.322	IGHV5-51	IGHJ5	IGLV1-44	IGLJ2	0.0249	0.0091
BD57-2200	BA.2 + BA.5/BF.7	--	0.00245	0.00198	<0.0005	0.000610	--	>10	>10	IGHV2-5	IGHJ4	IGLV1-47	IGLJ3	0.0526	0.0333
BD57-2201	BA.2 + BA.5/BF.7	--	0.0197	>10	0.00159	0.00121	--	>10	>10	IGHV2-70	IGHJ4	IGLV1-44	IGLJ2	0.0349	0.0574
BD57-2202	BA.2 + BA.5/BF.7	--	0.00148	0.00184	<0.0005	<0.0005	--	1.89	0.666	IGHV2-5	IGHJ4	IGLV1-47	IGLJ3	0.036	0.0485
BD57-2203	BA.2 + BA.5/BF.7	--	>10	--	--	>10	--	--	>10	IGHV4-39	IGHJ6	IGLV1-51	IGLJ3	0.0576	0.0148
BD57-2204	BA.2 + BA.5/BF.7	--	>10	--	--	>10	--	--	>10	IGHV1-2	IGHJ4	IGLV1-51	IGLJ2	0.0438	0.0121
BD57-2205	BA.2 + BA.5/BF.7	--	>10	--	--	>10	--	--	>10	IGHV2-5	IGHJ5	IGLV1-36	IGLJ2	0.0324	0.0121
BD57-2206	BA.2 + BA.5/BF.7	--	0.00432	<0.0005	<0.0005	<0.0005	--	>10	>10	IGHV2-5	IGHJ4	IGLV1-36	IGLJ3	0.0166	0.0211
BD57-2207	BA.2 + BA.5/BF.7	--	>10	--	--	>10	--	--	>10	IGHV1-46	IGHJ4	IGLV1-40	IGLJ3	0.0406	0.0299
BD57-2208	BA.2 + BA.5/BF.7	--	0.0487	0.0909	0.0192	0.643	--	0.781	0.405	IGHV1-69	IGHJ5	IGLV1-40	IGLJ3	0.0372	0.0089
BD57-2209	BA.2 + BA.5/BF.7	--	0.106	0.0956	0.0276	0.223	--	0.736	0.578	IGHV1-69	IGHJ4	IGLV1-40	IGLJ3	0.0483	0.012
BD57-2210	BA.2 + BA.5/BF.7	--	0.0641	0.0492	0.00288	0.0824	--	>10	>10	IGHV1-46	IGHJ5	IGLV1-40	IGLJ3	0.0332	0.0269
BD57-2211	BA.2 + BA.5/BF.7	--	0.000779	0.0193	<0.0005	0.00148	--	>10	>10	IGHV1-69	IGHJ6	IGLV1-44	IGLJ2	0.0417	0.0151
BD57-2212	BA.2 + BA.5/BF.7	--	0.237	0.691	0.136	0.286	--	>10	>10	IGHV3-21	IGHJ6	IGLV3-25	IGLJ2	0.0564	0.0585
BD57-2213	BA.2 + BA.5/BF.7	--	0.246	0.377	0.121	0.403	--	3.51	1.72	IGHV4-39	IGHJ6	IGLV3-25	IGLJ3	0.0547	0.0217
BD57-2214	BA.2 + BA.5/BF.7	--	0.373	>10	0.160	0.893	--	>10	>10	IGHV1-2	IGHJ4	IGLV3-21	IGLJ3	0.0107	0.003
BD57-2215	BA.2 + BA.5/BF.7	--	>10	--	--	>10	--	--	>10	IGHV3-30	IGHJ1	IGLV3-21	IGLJ3	0.0322	0.04
BD57-2216	BA.2 + BA.5/BF.7	--	>10	--	--	>10	--	--	>10	IGHV3-30	IGHJ1	IGLV3-21	IGLJ3	0.0214	0.0431
BD57-2217	BA.2 + BA.5/BF.7	--	>10	--	--	>10	--	--	>10	IGHV3-30	IGHJ1	IGLV3-21	IGLJ3	0.0429	0.0431

## Sheet: sheet2
Additional mAbs for DMS clustering
			Pseudovirus IC50 (μg/mL)							VDJ				SHM
Antibody Name	Source	BA.5 Epitope Group	D614G	BA.1	BA.2	BA.5	BQ.1.1	XBB	XBB.1.5	Heavy chain V gene	Heavy chain J gene	Light chain V gene	Light chain J gene	Heavy chain SHM rate	Light chain SHM rate
BD58-0199	BA.1 BTI	D3	>10	<0.0005	--	--	1.18	0.291	0.580	IGHV5-51	IGHJ4	IGLV3-25	IGLJ2	0.0082	0.0122
BD58-0200	BA.1 BTI	C/D1	>10	0.00359	--	--	0.000505	0.0793	0.111	IGHV3-30	IGHJ3	IGKV1-5	IGKJ1	0.0227	0.0125
BD58-0206	BA.1 BTI	D4	>10	0.0339	--	--	1.01	0.0445	0.0297	IGHV3-21	IGHJ4	IGLV1-44	IGLJ3	0.0188	0.0121
BD58-0207	BA.1 BTI	D3	>10	0.00327	--	--	0.00886	0.0674	0.0646	IGHV2-70	IGHJ6	IGLV3-25	IGLJ2	0.0137	0.0185
BD58-0265	BA.1 BTI	D3	>10	0.00175	--	--	0.0184	0.124	0.288	IGHV2-70	IGHJ6	IGLV3-25	IGLJ2	0.0109	0.0305
BD58-0278	BA.1 BTI	D3	>10	0.00546	--	--	0.256	0.0238	0.0192	IGHV2-70	IGHJ6	IGLV3-25	IGLJ3	0.0191	0.0338
BD58-0280	BA.1 BTI	D3	>10	0.513	--	--	1.62	1.03	2.22	IGHV3-21	IGHJ4	IGLV1-44	IGLJ3	0.0188	0.0302
BD58-0352	BA.1 BTI	D4	>10	0.00461	--	--	0.0123	0.00758	0.0120	IGHV4-30-4	IGHJ4	IGLV1-44	IGLJ3	0.0106	0.0151
BD58-0365	BA.1 BTI	C/D1	>10	0.000501	--	--	0.0246	0.480	1.20	IGHV1-69	IGHJ5	IGLV1-36	IGLJ3	0.0245	0.0121
BD57-0021	BA.1 BTI	A1	0.0169	0.0127	0.0139	0.0108	0.191	0.171	0.154	IGHV3-66	IGHJ4	IGKV3-20	IGKJ2	0.0535	0.0091
BD57-0027	BA.1 BTI	A1	0.0143	0.0212	0.0161	0.0139	0.162	0.120	0.296	IGHV3-66	IGHJ4	IGKV3-20	IGKJ2	0.031	0.0091
BD57-0033	BA.1 BTI	A1	0.0236	0.0121	0.00899	0.00771	0.00810	0.0152	0.0128	IGHV3-66	IGHJ4	IGKV3-20	IGKJ2	0.0455	0.0222
BD57-0056	BA.1 BTI	B	0.00303	0.00111	0.00125	0.120	0.0756	0.171	0.0714	IGHV3-9	IGHJ3	IGKV1-39	IGKJ4	0.0619	0.0373
BD57-0066	BA.1 BTI	F1	1.01	1.02	1.27	0.996	1.18	0.959	0.359	IGHV3-21	IGHJ4	IGLV6-57	IGLJ2	0.0137	0.0269
BD56-0004	BA.1 BTI	F1	0.0154	0.0895	0.834	0.574	0.692	0.916	1.59	IGHV3-22	IGHJ6	IGLV1-40	IGLJ3	0.09	0.0294
BD56-0023	BA.1 BTI	A1	0.00447	0.00441	0.00544	0.00721	0.824	1.27	1.44	IGHV3-66	IGHJ4	IGKV3-20	IGKJ2	0.062	0.0335
BD56-0096	BA.1 BTI	E2.2	0.184	0.0498	0.0406	0.362	1.45	0.663	0.667	IGHV1-69	IGHJ5	IGLV1-40	IGLJ2	0.0475	0.0449
BD56-0140	BA.1 BTI	E2.2	2.17	9.71	1.72	1.81	1.51	1.50	1.13	IGHV1-2	IGHJ3	IGLV2-23	IGLJ3	0.0528	0.0274
BD56-0150	BA.1 BTI	E2.2	>10	0.689	0.592	0.658	1.47	1.36	2.67	IGHV3-33	IGHJ4	IGLV3-25	IGLJ7	0.0556	0.0741
BD56-0154	BA.1 BTI	E3	1.67	0.716	0.846	0.725	0.560	1.92	3.02	IGHV4-39	IGHJ6	IGLV3-25	IGLJ3	0.0495	0.04
BD56-0209	BA.1 BTI	E3	1.20	0.641	1.17	0.911	0.634	1.65	3.50	IGHV5-51	IGHJ4	IGLV1-44	IGLJ3	0.0704	0.0606
BD56-0213	BA.1 BTI	E3	1.56	0.776	1.12	0.800	0.637	1.69	0.954	IGHV5-51	IGHJ5	IGLV1-44	IGLJ2	0.0388	0.0244
BD56-0459	BA.1 BTI	A1	0.0199	0.00829	0.00325	0.00232	0.378	0.163	0.316	IGHV3-53	IGHJ4	IGKV1-33	IGKJ4	0.0419	0.0311
BD56-0827	BA.1 BTI	D3	7.92	<0.0005	0.0153	0.0194	1.31	0.136	0.268	IGHV3-48	IGHJ4	IGLV6-57	IGLJ3	0.0194	0.009
BD56-0927	BA.1 BTI	F1	0.0736	0.237	1.62	1.96	1.89	1.57	1.73	IGHV2-70	IGHJ6	IGKV3-20	IGKJ5	0.0303	0.0427
BD56-0942	BA.1 BTI	C/D1	0.0355	0.0594	0.0262	0.0360	1.12	1.66	0.809	IGHV3-21	IGHJ6	IGLV2-11	IGLJ1	0.0499	0.0242
BD56-0943	BA.1 BTI	E1/E2.1	0.0110	0.0693	0.0575	0.0406	1.60	0.844	0.384	IGHV3-11	IGHJ6	IGKV3-20	IGKJ1	0.0429	0.0308
BD56-0962	BA.1 BTI	E3	0.232	0.328	0.817	0.932	1.34	1.34	0.579	IGHV5-51	IGHJ4	IGLV1-44	IGLJ2	0.0249	0.0181
BD56-0971	BA.1 BTI	E3	3.60	1.03	2.18	1.09	0.752	1.27	0.615	IGHV5-51	IGHJ4	IGLV3-19	IGLJ2	0.0028	0.0338
BD56-1000	BA.1 BTI	D3	>10	<0.0005	--	--	<0.0005	0.0515	0.0412	IGHV2-5	IGHJ4	IGLV3-25	IGLJ2	0.0163	0.0185
BD56-1007	BA.1 BTI	D4	>10	0.00491	--	--	0.0135	0.0399	0.0169	IGHV3-48	IGHJ4	IGLV1-44	IGLJ3	0.0241	0.0121
BD56-1011	BA.1 BTI	F3	>10	0.0911	--	--	0.293	0.628	0.292	IGHV4-30-4	IGHJ5	IGLV1-40	IGLJ3	0.0051	0
BD56-1021	BA.1 BTI	C/D1	>10	<0.0005	--	--	0.00214	0.0754	0.113	IGHV1-69	IGHJ6	IGLV3-1	IGLJ2	0.0263	0.0219
BD56-1047	BA.1 BTI	F3	>10	0.0146	--	--	0.0103	0.00522	0.0116	IGHV4-30-4	IGHJ4	IGLV2-14	IGLJ1	0.0112	0.0393
BD56-1104	BA.1 BTI	F3	>10	0.000678	--	--	0.724	0.430	0.973	IGHV1-2	IGHJ4	IGLV2-14	IGLJ1	0.0307	0.0242
BD56-1138	BA.1 BTI	D4	>10	<0.0005	--	--	0.0118	0.637	0.829	IGHV4-39	IGHJ3	IGLV1-40	IGLJ1	0.0106	0.006
BD57-1438	BA.1 BTI + BA.5/BF.7	F3	>10	0.00346	0.00267	0.00273	0.0309	0.0480	0.0340	IGHV1-18	IGHJ1	IGKV1-13	IGKJ2	0.0209	0.0124
BD57-1497	BA.1 BTI + BA.5/BF.7	D4	>10	<0.0005	<0.0005	<0.0005	0.000860	0.00146	0.00167	IGHV1-24	IGHJ4	IGKV1-17	IGKJ3	0.0507	0.0342
BD57-1520	BA.1 BTI + BA.5/BF.7	D4	>10	<0.0005	0.00238	<0.0005	0.00275	0.00156	0.00218	IGHV6-1	IGHJ4	IGKV1-39	IGKJ3	0.0412	0.0408
BD57-1524	BA.1 BTI + BA.5/BF.7	D3	>10	0.000504	0.0346	0.00757	>10	>10	>10	IGHV5-51	IGHJ4	IGKV1-33	IGKJ3	0.0172	0.0311
BD57-1527	BA.1 BTI + BA.5/BF.7	B	0.00693	<0.0005	0.000951	0.00154	0.00418	0.00417	0.00523	IGHV1-69	IGHJ4	IGKV1-33	IGKJ4	0.0463	0.0219
BD57-1531	BA.1 BTI + BA.5/BF.7	D4	>10	<0.0005	0.0115	0.00197	0.0306	0.00121	0.000984	IGHV7-4-1	IGHJ4	IGKV1-33	IGKJ5	0.0396	0.0373
BD57-1560	BA.1 BTI + BA.5/BF.7	D3	>10	<0.0005	<0.0005	<0.0005	0.159	>10	>10	IGHV5-51	IGHJ3	IGKV1-NL1	IGKJ2	0.0535	0.0373
BD57-1565	BA.1 BTI + BA.5/BF.7	D3	>10	<0.0005	<0.0005	<0.0005	0.159	0.716	0.672	IGHV5-51	IGHJ3	IGKV1-16	IGKJ4	0.0366	0.0093
BD57-1573	BA.1 BTI + BA.5/BF.7	D3	0.407	0.000640	0.000620	<0.0005	0.185	>10	>10	IGHV5-51	IGHJ5	IGKV1-39	IGKJ1	0.044	0.0585
BD57-1635	BA.1 BTI + BA.5/BF.7	D3	>10	0.00791	0.0335	0.0152	0.0380	>10	>10	IGHV5-51	IGHJ4	IGKV1-5	IGKJ4	0.0451	0.0435
BD57-1646	BA.1 BTI + BA.5/BF.7	C/D1	>10	0.000608	<0.0005	<0.0005	0.000642	>10	>10	IGHV3-30	IGHJ4	IGKV1-5	IGKJ2	0.0513	0.0155
BD57-1659	BA.1 BTI + BA.5/BF.7	D4	>10	<0.0005	<0.0005	<0.0005	0.00112	0.00752	0.0174	IGHV5-51	IGHJ3	IGKV3-20	IGKJ1	0.0535	0.0311
BD57-1666	BA.1 BTI + BA.5/BF.7	C/D1	>10	0.000943	0.00157	0.00110	0.00430	0.0212	0.0262	IGHV4-4	IGHJ4	IGKV4-1	IGKJ1	0.0426	0.0265
BD57-1667	BA.1 BTI + BA.5/BF.7	A1	>10	0.00149	0.00205	0.00138	0.00584	2.13	1.43	IGHV4-4	IGHJ4	IGKV4-1	IGKJ1	0.0256	0.0235
BD57-1670	BA.1 BTI + BA.5/BF.7	C/D1	>10	0.000979	<0.0005	0.000727	0.00245	0.116	>10	IGHV4-59	IGHJ4	IGKV4-1	IGKJ2	0.0183	0.0118
BD57-1673	BA.1 BTI + BA.5/BF.7	A1	>10	0.000776	0.0631	0.433	>10	>10	>10	IGHV4-59	IGHJ4	IGKV4-1	IGKJ4	0.0254	0.0029
BD57-1678	BA.1 BTI + BA.5/BF.7	A2	>10	0.00210	0.00305	0.0187	0.0500	0.0916	0.0593	IGHV3-30	IGHJ6	IGKV4-1	IGKJ2	0.0705	0.0647
BD57-1687	BA.1 BTI + BA.5/BF.7	A2	>10	0.0111	0.00986	0.0258	0.0561	0.0925	0.0459	IGHV3-30	IGHJ6	IGKV2-28	IGKJ4	0.0546	0.0119
BD57-1688	BA.1 BTI + BA.5/BF.7	A1	>10	<0.0005	0.000756	0.0722	0.113	0.0884	0.0478	IGHV3-30	IGHJ6	IGKV2-28	IGKJ2	0.0529	0.0267
BD57-1689	BA.1 BTI + BA.5/BF.7	D4	0.0553	<0.0005	<0.0005	0.000806	0.00268	0.00290	0.00198	IGHV5-51	IGHJ4	IGKV2-28	IGKJ1	0.0412	0.0297
BD57-1692	BA.1 BTI + BA.5/BF.7	D3	0.254	0.000592	0.000840	<0.0005	0.564	>10	>10	IGHV5-51	IGHJ6	IGKV2-29	IGKJ1	0.0593	0.0199
BD57-1701	BA.1 BTI + BA.5/BF.7	D3	>10	<0.0005	<0.0005	<0.0005	0.0745	>10	>10	IGHV5-51	IGHJ5	IGKV2-29	IGKJ3	0.0648	0.0386
BD57-1702	BA.1 BTI + BA.5/BF.7	D3	>10	<0.0005	0.00167	0.00101	0.115	>10	>10	IGHV5-51	IGHJ5	IGKV2-29	IGKJ3	0.0592	0.0297
BD57-1712	BA.1 BTI + BA.5/BF.7	D3	0.188	0.000592	0.00109	0.000825	0.0986	>10	>10	IGHV5-51	IGHJ5	IGKV2D-29	IGKJ1	0.0451	0.0415
BD57-1720	BA.1 BTI + BA.5/BF.7	D4	>10	0.00197	0.00305	0.00318	0.00622	0.0140	0.00578	IGHV5-51	IGHJ4	IGKV3-15	IGKJ1	0.03	0.057
BD57-1730	BA.1 BTI + BA.5/BF.7	D3	0.205	<0.0005	<0.0005	0.000985	0.00283	0.935	0.819	IGHV5-51	IGHJ3	IGKV3-20	IGKJ5	0.0479	0.0308
BD57-1739	BA.1 BTI + BA.5/BF.7	D4	>10	0.000907	0.00271	0.00187	0.00467	0.0332	0.0867	IGHV5-51	IGHJ4	IGKV3-20	IGKJ1	0.0268	0.0185
BD57-1741	BA.1 BTI + BA.5/BF.7	D3	0.374	<0.0005	<0.0005	<0.0005	0.0176	>10	>10	IGHV5-51	IGHJ3	IGKV3-20	IGKJ5	0.0366	0.0185
BD57-1748	BA.1 BTI + BA.5/BF.7	D3	>10	<0.0005	0.00397	0.00750	0.0294	>10	>10	IGHV5-51	IGHJ5	IGKV3-20	IGKJ3	0.0332	0.0213
BD57-1755	BA.1 BTI + BA.5/BF.7	D3	1.43	<0.0005	0.00188	0.00100	0.000908	0.0905	0.0873	IGHV5-51	IGHJ4	IGKV3-20	IGKJ2	0.0526	0.0248
BD57-1759	BA.1 BTI + BA.5/BF.7	C/D1	>10	>10	>10	1.09	>10	>10	>10	IGHV3-30	IGHJ4	IGKV3-15	IGKJ4	0.0327	0.0122
BD57-1760	BA.1 BTI + BA.5/BF.7	D3	1.09	0.00120	0.00370	0.00352	0.0145	>10	>10	IGHV5-51	IGHJ3	IGKV3-15	IGKJ1	0.062	0.044
BD57-1761	BA.1 BTI + BA.5/BF.7	D3	>10	0.00519	0.0348	0.0289	0.0496	>10	>10	IGHV5-51	IGHJ4	IGKV3-15	IGKJ1	0.0388	0.0215
BD57-1776	BA.1 BTI + BA.5/BF.7	D3	0.828	<0.0005	<0.0005	<0.0005	0.00137	0.0715	0.0520	IGHV5-51	IGHJ4	IGKV3D-15	IGKJ1	0.0471	0.0404
BD57-1789	BA.1 BTI + BA.5/BF.7	D3	0.124	0.000933	0.000513	<0.0005	0.00725	>10	>10	IGHV5-51	IGHJ2	IGKV3-20	IGKJ3	0.0479	0.0523
BD57-1796	BA.1 BTI + BA.5/BF.7	D3	>10	0.000647	0.00326	0.00229	0.00928	>10	>10	IGHV5-51	IGHJ3	IGKV3-15	IGKJ1	0.0592	0.0528
BD57-1823	BA.1 BTI + BA.5/BF.7	D3	>10	<0.0005	<0.0005	0.000588	0.000782	0.000943	<0.0005	IGHV4-39	IGHJ5	IGLV6-57	IGLJ3	0.0507	0.0393
BD57-1830	BA.1 BTI + BA.5/BF.7	A1	>10	0.0651	0.151	0.153	0.188	0.116	0.303	IGHV3-30	IGHJ4	IGLV9-49	IGLJ3	0.0617	0.0287
BD57-1858	BA.1 BTI + BA.5/BF.7	A1	>10	0.00166	0.00361	0.00249	0.00449	0.0141	0.00830	IGHV3-9	IGHJ4	IGLV2-14	IGLJ1	0.0381	0.0262
BD57-1861	BA.1 BTI + BA.5/BF.7	D4	>10	0.000829	0.000537	0.00541	0.0342	0.00796	0.00991	IGHV1-8	IGHJ6	IGLV2-23	IGLJ2	0.0461	0.0309
BD57-1871	BA.1 BTI + BA.5/BF.7	D4	>10	<0.0005	0.00120	0.00207	0.00526	0.000920	0.00126	IGHV4-38-2	IGHJ4	IGLV2-8	IGLJ2	0.0522	0.0308
BD57-1883	BA.1 BTI + BA.5/BF.7	D4	>10	0.000556	0.00102	0.00355	0.0134	0.00297	0.00232	IGHV7-4-1	IGHJ4	IGLV2-11	IGLJ3	0.0297	0.0247
BD57-1895	BA.1 BTI + BA.5/BF.7	D3	0.436	0.000675	0.00219	<0.0005	0.00849	0.00102	<0.0005	IGHV5-51	IGHJ4	IGLV1-47	IGLJ2	0.0471	0.0419
BD57-1896	BA.1 BTI + BA.5/BF.7	D3	>10	0.000543	0.00595	0.00744	0.0601	0.00754	0.00537	IGHV5-51	IGHJ3	IGLV1-44	IGLJ1	0.0468	0.0269
BD57-1907	BA.1 BTI + BA.5/BF.7	D3	>10	0.0135	0.0712	0.0476	>10	>10	>10	IGHV5-51	IGHJ4	IGLV1-44	IGLJ1	0.0648	0.0329
BD57-1908	BA.1 BTI + BA.5/BF.7	D4	>10	<0.0005	<0.0005	<0.0005	0.000928	0.000925	<0.0005	IGHV4-39	IGHJ3	IGLV1-44	IGLJ1	0.0536	0.0091
BD57-1912	BA.1 BTI + BA.5/BF.7	D4	>10	<0.0005	<0.0005	<0.0005	<0.0005	0.00387	0.000574	IGHV4-31	IGHJ2	IGLV1-47	IGLJ2	0.0459	0.0363
BD57-1923	BA.1 BTI + BA.5/BF.7	D3	>10	0.00210	0.00360	0.00777	0.194	>10	>10	IGHV5-51	IGHJ5	IGLV1-51	IGLJ3	0.0388	0.0211
BD57-1926	BA.1 BTI + BA.5/BF.7	C/D1	0.733	<0.0005	<0.0005	0.0209	0.0186	0.269	>10	IGHV1-46	IGHJ4	IGLV1-51	IGLJ2	0.0218	0.0242
BD57-1928	BA.1 BTI + BA.5/BF.7	A2	>10	0.00339	0.00469	0.00588	0.0119	0.00814	0.00782	IGHV3-23	IGHJ6	IGLV1-51	IGLJ1	0.0315	0.0121
BD57-1934	BA.1 BTI + BA.5/BF.7	D2	0.0227	<0.0005	<0.0005	<0.0005	0.688	0.440	>10	IGHV2-5	IGHJ6	IGLV1-51	IGLJ3	0.0551	0.0514
BD57-1939	BA.1 BTI + BA.5/BF.7	A2	>10	0.000715	<0.0005	0.000762	0.00498	0.0135	0.00360	IGHV3-21	IGHJ5	IGLV1-40	IGLJ2	0.049	0.0267
BD57-1963	BA.1 BTI + BA.5/BF.7	D3	>10	0.000838	0.00794	0.00610	0.0343	0.00878	0.00722	IGHV2-70	IGHJ6	IGLV3-25	IGLJ2	0.0352	0.061
BD57-1986	BA.1 BTI + BA.5/BF.7	D3	>10	0.00129	0.00208	0.00199	0.00516	0.00680	0.00769	IGHV2-70	IGHJ6	IGLV3-25	IGLJ2	0.0301	0.0246
BD57-1989	BA.1 BTI + BA.5/BF.7	D3	>10	<0.0005	<0.0005	<0.0005	0.00102	0.00312	0.00652	IGHV2-70	IGHJ6	IGLV3-25	IGLJ2	0.0325	0.0366
BD57-1992	BA.1 BTI + BA.5/BF.7	D3	>10	0.000763	0.000701	0.00132	0.00452	0.0267	0.0443	IGHV2-70	IGHJ4	IGLV3-25	IGLJ2	0.0239	0.0305
BD57-1993	BA.1 BTI + BA.5/BF.7	D3	>10	<0.0005	<0.0005	<0.0005	0.000902	<0.0005	0.0301	IGHV2-70	IGHJ3	IGLV3-25	IGLJ3	0.0218	0.0153
BD57-1994	BA.1 BTI + BA.5/BF.7	D3	>10	0.000510	<0.0005	<0.0005	0.00113	0.00773	0.0330	IGHV2-70	IGHJ4	IGLV3-25	IGLJ2	0.03	0.0215
BD57-1995	BA.1 BTI + BA.5/BF.7	C/D1	>10	<0.0005	<0.0005	0.00143	0.000560	>10	>10	IGHV3-15	IGHJ6	IGLV3-10	IGLJ1	0.056	0.0433
BD57-2000	BA.1 BTI + BA.5/BF.7	D3	>10	<0.0005	0.000669	<0.0005	0.00106	0.00117	<0.0005	IGHV2-70	IGHJ6	IGLV3-25	IGLJ2	0.041	0.0427
BD57-2001	BA.1 BTI + BA.5/BF.7	D3	>10	0.0204	0.00452	0.00231	0.00654	0.0154	0.0238	IGHV2-70	IGHJ6	IGLV3-25	IGLJ2	0.0137	0.0308
BD57-2004	BA.1 BTI + BA.5/BF.7	D3	>10	<0.0005	<0.0005	<0.0005	<0.0005	0.00254	0.0183	IGHV2-70	IGHJ4	IGLV3-25	IGLJ2	0.0027	0.0123
BD57-2006	BA.1 BTI + BA.5/BF.7	D3	>10	<0.0005	<0.0005	0.00138	0.00236	>10	>10	IGHV3-43	IGHJ4	IGLV3-25	IGLJ2	0.0332	0.037
BD57-2007	BA.1 BTI + BA.5/BF.7	D3	>10	0.000586	0.00100	0.000788	0.00389	0.00132	0.00196	IGHV2-70	IGHJ6	IGLV3-25	IGLJ2	0.0355	0.0492
BD57-2009	BA.1 BTI + BA.5/BF.7	D3	>10	0.00446	0.00659	0.00526	0.00279	0.0566	0.0340	IGHV2-70	IGHJ6	IGLV3-25	IGLJ3	0.0164	0.0185
BD57-2012	BA.1 BTI + BA.5/BF.7	D3	>10	0.00546	0.0192	0.00323	0.00790	0.00276	0.00162	IGHV2-70	IGHJ6	IGLV3-25	IGLJ3	0.0219	0.0091
BD57-2019	BA.1 BTI + BA.5/BF.7	D3	>10	<0.0005	<0.0005	0.00109	0.00162	0.0256	0.0108	IGHV3-43	IGHJ4	IGLV3-25	IGLJ2	0.0436	0.0518
BD57-2022	BA.1 BTI + BA.5/BF.7	D3	>10	<0.0005	<0.0005	0.000949	0.00242	0.00251	0.00193	IGHV4-39	IGHJ4	IGLV3-25	IGLJ2	0.0681	0.04
BD57-2030	BA.1 BTI + BA.5/BF.7	C/D1	>10	0.000861	<0.0005	0.00166	0.00447	0.0698	0.00422	IGHV3-15	IGHJ4	IGLV3-1	IGLJ1	0.0262	0.0308
BD57-2032	BA.1 BTI + BA.5/BF.7	D3	>10	0.00483	0.00365	0.0107	0.0165	0.0295	0.0152	IGHV2-70	IGHJ4	IGLV3-25	IGLJ2	0.0412	0.0431
BD57-2037	BA.1 BTI + BA.5/BF.7	D3	>10	0.000725	0.0216	0.0119	0.367	0.194	0.262	IGHV3-11	IGHJ2	IGLV3-9	IGLJ2	0.0499	0.0127
BD58-0427	BA.2 BTI	F3	>10	>10	0.00167	0.00542	0.599	0.973	0.639	IGHV5-51	IGHJ6	IGKV1-39	IGKJ1	0.0161	0.0154
BD58-0430	BA.2 BTI	F3	>10	>10	0.0208	0.0162	0.0649	0.157	0.218	IGHV4-39	IGHJ3	IGKV3-20	IGKJ4	0.0166	0.0061
BD58-0459	BA.2 BTI	F3	>10	0.00434	0.000581	<0.0005	0.00111	0.00342	0.00244	IGHV4-31	IGHJ5	IGLV1-40	IGLJ2	0.0182	0.0122
BD58-0497	BA.2 BTI	D4	>10	0.118	0.177	0.193	0.326	0.160	0.388	IGHV1-8	IGHJ4	IGLV2-11	IGLJ1	0.016	0.0246
BD58-0499	BA.2 BTI	F3	>10	>10	0.00449	0.141	0.540	0.412	0.210	IGHV4-61	IGHJ4	IGKV3-11	IGKJ3	0.0317	0.0031
BD58-0513	BA.2 BTI	F3	>10	>10	0.000655	0.00122	0.0307	0.135	0.277	IGHV5-51	IGHJ4	IGKV1-39	IGKJ2	0.0241	0.028
BD58-0516	BA.2 BTI	F3	>10	>10	0.000647	0.000560	0.00111	0.00716	0.0153	IGHV5-51	IGHJ5	IGKV1-39	IGKJ3	0.027	0
BD58-0537	BA.2 BTI	F3	>10	0.0804	0.00112	0.00375	0.0114	0.0117	0.0262	IGHV4-39	IGHJ6	IGLV1-40	IGLJ2	0.0344	0.015
BD56-1180	BA.2 BTI	D3	1.90	0.000717	0.00130	0.000938	1.98	1.82	1.68	IGHV5-51	IGHJ3	IGKV3-15	IGKJ4	0.0282	0.0189
BD56-1183	BA.2 BTI	F1	>10	1.83	0.250	0.228	0.943	1.17	0.648	IGHV3-23	IGHJ5	IGLV6-57	IGLJ3	0.0223	0.012
BD56-1192	BA.2 BTI	D3	9.84	0.544	0.490	0.108	0.539	1.94	1.53	IGHV3-30-3	IGHJ6	IGLV2-14	IGLJ3	0.0188	0.0181
BD56-1198	BA.2 BTI	A1	>10	0.0116	0.00442	0.00359	0.0197	0.0827	0.0712	IGHV3-53	IGHJ4	IGKV1-33	IGKJ3	0.0227	0.0062
BD56-1238	BA.2 BTI	A2	>10	<0.0005	0.000828	0.00202	0.00125	0.00424	0.00433	IGHV3-30-3	IGHJ3	IGLV1-40	IGLJ2	0.0293	0.0267
BD56-1247	BA.2 BTI	D4	0.0279	0.00576	0.00337	0.00226	0.00543	0.00715	0.00714	IGHV4-30-4	IGHJ4	IGLV6-57	IGLJ7	0.0595	0.0331
BD56-1259	BA.2 BTI	D4	0.0156	0.106	0.00960	0.00705	0.00507	0.00673	0.00981	IGHV4-30-4	IGHJ4	IGLV6-57	IGLJ7	0.0459	0.0211
BD56-1267	BA.2 BTI	D4	0.00194	0.0107	0.00169	0.00220	0.00500	0.00725	0.0147	IGHV4-30-4	IGHJ4	IGLV6-57	IGLJ7	0.0595	0.0241
BD56-1269	BA.2 BTI	E1/E2.1	0.0281	0.108	0.0887	0.0910	1.16	0.197	0.110	IGHV3-21	IGHJ6	IGLV1-51	IGLJ3	0.0505	0.0363
BD56-1288	BA.2 BTI	D4	0.00571	0.751	0.0376	0.0325	0.126	0.0921	0.0957	IGHV4-30-4	IGHJ4	IGLV6-57	IGLJ7	0.0486	0.0271
BD56-1289	BA.2 BTI	D4	0.0605	0.0140	0.00840	0.0137	0.0167	0.0164	0.00846	IGHV4-30-4	IGHJ4	IGLV6-57	IGLJ7	0.0568	0.0181
BD56-1292	BA.2 BTI	E3	0.193	0.193	0.151	0.196	1.72	1.65	0.678	IGHV4-39	IGHJ3	IGLV2-14	IGLJ2	0.0291	0.0244
BD56-1302	BA.2 BTI	A1	0.00572	0.00217	0.00273	0.00205	0.00213	0.0181	0.0107	IGHV3-66	IGHJ6	IGKV3-15	IGKJ2	0.0706	0.0369
BD56-1331	BA.2 BTI	F1	1.75	>10	1.14	1.44	1.96	0.820	1.44	IGHV3-23	IGHJ5	IGKV1-39	IGKJ1	0.0548	0.0554
BD56-1341	BA.2 BTI	E2.2	0.253	1.17	0.227	0.272	0.459	0.638	0.579	IGHV3-33	IGHJ6	IGLV1-40	IGLJ3	0.032	0.0389
BD56-1343	BA.2 BTI	E3	>10	0.240	0.738	0.366	0.420	0.490	0.596	IGHV1-46	IGHJ5	IGKV3-11	IGKJ2	0.0599	0.0152
BD56-1354	BA.2 BTI	A1	6.96	0.00565	0.000691	0.00202	0.452	0.628	0.271	IGHV3-66	IGHJ6	IGKV1-33	IGKJ1	0.0171	0.0092
BD56-1360	BA.2 BTI	F3	>10	>10	0.00378	0.00888	0.0638	0.0358	0.0206	IGHV4-4	IGHJ4	IGKV2-29	IGKJ2	0.0222	0.0148
BD56-1367	BA.2 BTI	D4	>10	0.00384	0.000632	<0.0005	0.00257	0.00453	0.00324	IGHV2-5	IGHJ4	IGKV1-33	IGKJ1	0.0196	0.0219
BD56-1370	BA.2 BTI	D4	>10	0.000503	<0.0005	0.00114	0.0229	0.0557	0.0317	IGHV4-59	IGHJ4	IGLV3-21	IGLJ2	0.0165	0.0217
BD56-1373	BA.2 BTI	D4	>10	0.00227	0.000845	<0.0005	0.00209	0.00331	0.00613	IGHV1-8	IGHJ4	IGLV2-23	IGLJ2	0.0295	0.0274
BD56-1378	BA.2 BTI	F3	>10	>10	0.0166	0.0178	0.0252	0.103	0.202	IGHV1-24	IGHJ5	IGKV1-9	IGKJ3	0.0657	0.0469
BD56-1379	BA.2 BTI	A2	>10	0.00555	0.00300	0.00736	0.00786	0.0291	0.0157	IGHV3-9	IGHJ6	IGLV2-14	IGLJ1	0.0234	0.0061
BD56-1402	BA.2 BTI	E3	1.19	0.541	0.608	0.492	0.528	1.15	1.25	IGHV5-51	IGHJ6	IGLV1-44	IGLJ3	0.0472	0.0242
BD56-1405	BA.2 BTI	E3	0.913	0.412	0.520	0.788	0.528	0.810	0.346	IGHV5-51	IGHJ5	IGLV1-44	IGLJ1	0.0306	0.0394
BD56-1407	BA.2 BTI	E3	0.440	0.155	0.119	0.0909	0.786	0.388	0.245	IGHV5-51	IGHJ5	IGLV1-44	IGLJ3	0.0391	0.0212
BD56-1432	BA.2 BTI	E2.2	1.15	0.556	0.423	0.268	1.30	1.12	1.34	IGHV3-33	IGHJ4	IGLV1-47	IGLJ3	0.0378	0.0423
BD56-1461	BA.2 BTI	A1	0.00411	0.00255	0.00165	0.00456	0.763	0.142	0.0648	IGHV3-53	IGHJ4	IGKV1-33	IGKJ5	0.0516	0.028
BD56-1478	BA.2 BTI	E1/E2.1	0.0108	0.162	0.211	2.44	1.75	1.96	1.57	IGHV4-59	IGHJ3	IGKV1-33	IGKJ1	0.0463	0.0186
BD56-1533	BA.2 BTI	E2.2	>10	0.513	0.357	0.562	0.580	0.585	0.795	IGHV5-51	IGHJ4	IGKV3-20	IGKJ1	0.0443	0.0309
BD56-1560	BA.2 BTI	E3	1.06	1.48	0.608	0.728	0.757	1.65	1.03	IGHV5-51	IGHJ5	IGLV1-44	IGLJ2	0.0642	0.0396
BD56-1578	BA.2 BTI	E3	1.94	1.31	1.16	0.591	0.878	0.889	0.746	IGHV5-51	IGHJ4	IGLV1-44	IGLJ1	0.033	0.0242
BD56-1593	BA.2 BTI	E3	2.04	2.99	2.03	0.568	0.868	1.42	1.39	IGHV5-51	IGHJ4	IGLV1-44	IGLJ2	0.0337	0.0393
BD56-1595	BA.2 BTI	E3	1.60	1.07	1.11	0.918	0.978	0.800	0.496	IGHV5-51	IGHJ5	IGLV3-19	IGLJ1	0.048	0.0309
BD56-1600	BA.2 BTI	E3	0.939	0.839	0.943	0.350	1.08	0.791	0.600	IGHV1-46	IGHJ5	IGLV6-57	IGLJ3	0.0576	0.0486
BD56-1613	BA.2 BTI	E3	>10	0.565	0.636	0.930	0.754	0.715	0.328	IGHV5-51	IGHJ5	IGLV3-19	IGLJ1	0.0141	0.034
BD56-1772	BA.2 BTI	E2.2	0.366	0.0890	0.0399	0.464	1.28	1.08	1.07	IGHV1-69	IGHJ4	IGLV1-40	IGLJ3	0.0536	0.0269
BD56-1783	BA.2 BTI	E2.2	2.65	0.702	0.717	2.51	1.24	1.18	2.68	IGHV4-59	IGHJ4	IGKV3-20	IGKJ1	0.0327	0.025
BD56-1807	BA.2 BTI	E2.2	0.303	0.0734	0.0579	1.80	1.62	1.41	0.632	IGHV1-69	IGHJ5	IGLV1-40	IGLJ3	0.067	0.0359
BD56-1851	BA.2 BTI	A1	0.00813	0.00119	0.00170	0.00178	0.00517	0.0194	0.0145	IGHV3-30-3	IGHJ6	IGKV1-9	IGKJ2	0.0434	0.0314
BD56-1854	BA.2 BTI	A1	0.00375	0.00108	0.00296	0.00133	0.00221	0.00891	0.00886	IGHV3-53	IGHJ6	IGLV1-40	IGLJ3	0.0806	0.0542
BD56-1867	BA.2 BTI	F1	0.0907	0.0550	6.48	0.188	0.238	0.179	0.385	IGHV3-30	IGHJ4	IGLV1-40	IGLJ3	0.0416	0.0325
BD56-1884	BA.2 BTI	F1	0.103	--	0.407	0.318	0.665	0.473	1.06	IGHV3-30	IGHJ4	IGLV1-40	IGLJ3	0.0361	0.0088
BD56-1926	BA.2 BTI	A1	0.0850	0.0354	0.0476	0.0208	0.105	0.124	0.236	IGHV1-69	IGHJ6	IGKV1-5	IGKJ1	0.0767	0.0348
BD56-1932	BA.2 BTI	A1	0.00200	0.188	0.148	0.0509	0.179	0.250	0.222	IGHV1-69	IGHJ6	IGKV1-5	IGKJ1	0.0635	0.0315
BD58-0590	BA.5 BTI	F1	>10	>10	>10	>10	>10	>10	>10	IGHV3-30	IGHJ1	IGKV1-39	IGKJ2	0.0327	0.04
BD58-0592	BA.5 BTI	A1	--	--	--	--	--	>10	>10	IGHV5-51	IGHJ4	IGLV1-44	IGLJ2	0	0
BD57-0101	BA.5 BTI	E2.2	0.0960	0.0499	0.0202	0.917	>10	6.06	>10	IGHV1-69	IGHJ5	IGLV1-40	IGLJ2	0.0243	0.024
BD57-0102	BA.5 BTI	E2.2	>10	2.60	4.86	4.68	>10	4.85	9.86	IGHV3-9	IGHJ4	IGLV3-21	IGLJ1	0.0249	0.046
BD57-0103	BA.5 BTI	B	0.00186	0.00313	0.00297	0.962	>10	>10	>10	IGHV1-58	IGHJ3	IGKV3-20	IGKJ1	0.0595	0.0217
BD57-0104	BA.5 BTI	E2.2	>10	6.67	5.19	4.83	>10	>10	>10	IGHV3-21	IGHJ4	IGKV3-20	IGKJ2	0.0471	0.0274
BD57-0105	BA.5 BTI	E2.2	>10	4.68	6.11	4.63	>10	>10	>10	IGHV3-9	IGHJ4	IGLV3-21	IGLJ2	0.0354	0.019
BD57-0106	BA.5 BTI	E3	>10	>10	>10	>10	>10	>10	>10	IGHV3-9	IGHJ4	IGLV4-69	IGLJ2	0.0335	0.021
BD57-0107	BA.5 BTI	E2.2	0.176	0.217	0.143	>10	>10	2.43	5.69	IGHV1-69	IGHJ5	IGLV1-40	IGLJ2	0.0697	0.024
BD57-0108	BA.5 BTI	A1	0.0146	0.0297	0.0165	0.0195	0.0736	0.138	0.0879	IGHV3-53	IGHJ4	IGKV1-5	IGKJ1	0.0743	0.0548
BD57-0110	BA.5 BTI	E3	0.0210	>10	>10	8.23	>10	>10	>10	IGHV4-39	IGHJ4	IGKV3-11	IGKJ3	0.03	0.0062
BD57-0111	BA.5 BTI	F1	2.34	1.86	2.76	2.21	1.38	3.32	4.76	IGHV3-30	IGHJ4	IGKV1-39	IGKJ1	0.0222	0.0246
BD57-0112	BA.5 BTI	E2.2	0.000841	<0.0005	0.280	0.497	>10	>10	>10	IGHV3-9	IGHJ4	IGLV3-1	IGLJ2	0.0405	0.0408
BD57-0113	BA.5 BTI	F1	0.510	6.27	5.45	3.31	5.91	4.57	8.48	IGHV3-9	IGHJ4	IGLV1-44	IGLJ2	0.0164	0.0211
BD57-0114	BA.5 BTI	F3	>10	2.34	0.281	0.157	0.751	>10	>10	IGHV2-5	IGHJ4	IGKV3-15	IGKJ5	0	0.0062
BD57-0115	BA.5 BTI	E2.2	>10	4.64	5.45	2.94	>10	7.99	>10	IGHV5-51	IGHJ4	IGKV3-15	IGKJ2	0.0385	0.0189
BD57-0116	BA.5 BTI	F3	>10	>10	0.0191	0.0100	0.0254	0.0254	0.00217	IGHV4-30-4	IGHJ4	IGLV2-14	IGLJ2	0.0139	0.012
BD57-0117	BA.5 BTI	E1/E2.1	0.278	0.797	0.000523	0.000888	>10	>10	>10	IGHV1-69	IGHJ4	IGKV1-33	IGKJ3	0.111	0.069
BD57-0118	BA.5 BTI	E2.2	0.00823	1.03	0.822	1.60	2.49	2.57	4.38	IGHV2-5	IGHJ4	IGKV1-12	IGKJ5	0.027	0.0217
BD57-0119	BA.5 BTI	C/D1	1.18	0.354	0.262	2.23	>10	>10	>10	IGHV1-69	IGHJ5	IGKV1-39	IGKJ1	0.0798	0.0435
BD57-0120	BA.5 BTI	F1	4.44	2.28	5.45	2.77	1.55	3.43	6.09	IGHV3-13	IGHJ6	IGKV1-39	IGKJ2	0.0724	0.034
BD57-0122	BA.5 BTI	A1	>10	>10	>10	0.0539	>10	>10	>10	IGHV3-13	IGHJ4	IGLV9-49	IGLJ3	0.0866	0.0659
BD57-0124	BA.5 BTI	E2.2	>10	1.63	1.87	2.37	5.03	4.80	1.94	IGHV3-15	IGHJ6	IGKV1-5	IGKJ1	0.0293	0.0217
BD57-0125	BA.5 BTI	F1	>10	>10	>10	>10	>10	>10	>10	IGHV3-13	IGHJ6	IGKV1-39	IGKJ1	0.0391	0.0523
BD57-0126	BA.5 BTI	E2.2	0.343	0.306	0.285	2.38	>10	>10	>10	IGHV1-69	IGHJ1	IGLV1-40	IGLJ2	0.0607	0.024
BD57-0127	BA.5 BTI	F1	>10	>10	>10	>10	>10	>10	>10	IGHV3-13	IGHJ4	IGKV1-39	IGKJ2	0.0375	0.04
BD57-0128	BA.5 BTI	E2.2	1.33	0.712	0.519	3.35	>10	>10	>10	IGHV1-69	IGHJ4	IGLV1-40	IGLJ2	0.0375	0.015
BD57-0129	BA.5 BTI	A1	0.00572	0.00276	0.00290	0.00289	0.00351	0.00640	0.00179	IGHV3-66	IGHJ4	IGKV3-15	IGKJ2	0.0451	0.0152
BD57-0130	BA.5 BTI	A2	>10	>10	>10	0.208	0.981	2.46	1.92	IGHV4-39	IGHJ4	IGLV1-40	IGLJ2	0.0106	0
BD57-0131	BA.5 BTI	E2.2	>10	2.43	2.38	1.89	>10	>10	>10	IGHV3-30	IGHJ5	IGLV3-21	IGLJ1	0.0643	0.0431
BD57-0132	BA.5 BTI	E3	>10	>10	>10	>10	>10	>10	>10	IGHV3-21	IGHJ4	IGKV3-20	IGKJ2	0.034	0.0122
BD57-0133	BA.5 BTI	E3	>10	5.64	3.45	3.26	>10	>10	>10	IGHV4-34	IGHJ5	IGLV1-40	IGLJ1	0.0824	0.045
BD57-0134	BA.5 BTI	A1	0.00438	0.00641	0.00764	0.00422	0.0101	0.0170	0.00661	IGHV3-53	IGHJ4	IGKV3-15	IGKJ2	0.0419	0.0274
BD57-0136	BA.5 BTI	E1/E2.1	0.0918	0.0712	0.0735	0.225	>10	>10	>10	IGHV2-26	IGHJ4	IGLV3-21	IGLJ2	0.0615	0.04
BD57-0137	BA.5 BTI	F1	0.151	>10	>10	>10	>10	>10	>10	IGHV3-9	IGHJ4	IGKV2-28	IGKJ2	0.0897	0.0267
BD57-0139	BA.5 BTI	E2.2	0.0287	0.0984	0.149	0.469	>10	>10	>10	IGHV2-26	IGHJ4	IGLV3-21	IGLJ2	0.0559	0.0554
BD57-0140	BA.5 BTI	F1	>10	>10	>10	>10	>10	>10	>10	IGHV3-13	IGHJ5	IGKV1-39	IGKJ5	0.03	0.0308
BD57-0141	BA.5 BTI	A1	0.0123	>10	>10	>10	>10	>10	>10	IGHV3-7	IGHJ4	IGKV1-NL1	IGKJ1	0.0277	0.0342
BD57-0142	BA.5 BTI	E2.2	1.14	1.60	1.94	3.07	>10	3.57	1.51	IGHV4-39	IGHJ4	IGLV1-44	IGLJ3	0.0639	0.0423
BD57-0143	BA.5 BTI	F1	0.0191	>10	>10	>10	>10	>10	>10	IGHV1-69	IGHJ6	IGKV1-33	IGKJ4	0.0472	0.0594
BD57-0144	BA.5 BTI	F1	>10	>10	>10	>10	>10	>10	>10	IGHV2-5	IGHJ2	IGLV1-47	IGLJ2	0.0252	0.0515
BD57-0145	BA.5 BTI	D2	<0.0005	0.212	0.000600	<0.0005	>10	>10	>10	IGHV2-70	IGHJ4	IGLV1-51	IGLJ3	0.0572	0.0424
BD57-0146	BA.5 BTI	E3	3.70	1.45	2.09	3.86	5.63	3.93	8.68	IGHV1-46	IGHJ4	IGKV1-5	IGKJ1	0.0899	0.0621
BD57-0147	BA.5 BTI	C/D1	0.00330	0.221	0.405	0.0306	0.0329	>10	>10	IGHV3-49	IGHJ4	IGLV1-51	IGLJ2	0.0575	0.0181
BD57-0148	BA.5 BTI	E2.2	>10	4.44	4.57	4.23	>10	>10	>10	IGHV1-2	IGHJ4	IGKV1-33	IGKJ1	0.0914	0.0373
BD57-0149	BA.5 BTI	C/D1	0.000667	>10	>10	5.86	>10	0.596	1.05	IGHV1-69	IGHJ4	IGKV1-39	IGKJ1	0.058	0.0124
BD57-0150	BA.5 BTI	E1/E2.1	0.199	0.901	0.409	3.87	>10	>10	>10	IGHV4-39	IGHJ6	IGKV1-33	IGKJ3	0.0342	0.0244
BD57-0151	BA.5 BTI	F1	>10	>10	>10	>10	>10	>10	>10	IGHV3-13	IGHJ2	IGKV1-39	IGKJ5	0.0249	0.0215
BD57-0152	BA.5 BTI	A1	0.00547	0.00399	0.00431	0.00792	>10	>10	>10	IGHV3-53	IGHJ4	IGKV1-33	IGKJ2	0.0471	0.0246
BD57-0153	BA.5 BTI	F1	0.104	0.665	0.503	0.441	1.98	2.00	2.24	IGHV3-53	IGHJ3	IGLV6-57	IGLJ3	0.062	0.0238
BD57-0154	BA.5 BTI	F1	0.445	6.50	4.15	3.77	4.07	3.18	7.49	IGHV3-23	IGHJ3	IGKV1-5	IGKJ2	0.0681	0.0311
BD57-0155	BA.5 BTI	E2.2	>10	5.16	5.57	>10	>10	>10	>10	IGHV3-30	IGHJ4	IGKV1-39	IGKJ4	0.0432	0.0348
BD57-0156	BA.5 BTI	F1	>10	>10	>10	>10	>10	>10	>10	IGHV3-13	IGHJ2	IGKV1-39	IGKJ2	0.044	0.0585
BD57-0157	BA.5 BTI	E2.2	>10	0.699	1.28	1.39	>10	>10	>10	IGHV1-69	IGHJ6	IGKV3-20	IGKJ5	0.0407	0.0185
BD57-0158	BA.5 BTI	F3	>10	>10	>10	>10	>10	>10	>10	IGHV2-5	IGHJ5	IGKV3-15	IGKJ1	0.0027	0.0031
BD57-0159	BA.5 BTI	F1	>10	>10	>10	>10	>10	>10	>10	IGHV3-64D	IGHJ4	IGKV1-39	IGKJ2	0.0522	0.0186
BD57-0160	BA.5 BTI	E2.2	>10	4.91	5.10	>10	>10	>10	>10	IGHV3-30	IGHJ5	IGLV3-21	IGLJ1	0.0483	0.04
BD57-0161	BA.5 BTI	E1/E2.1	0.102	0.141	0.0931	0.0978	>10	2.25	1.71	IGHV1-69	IGHJ3	IGLV3-21	IGLJ3	0.0463	0.0215
BD57-0162	BA.5 BTI	E3	>10	>10	>10	>10	>10	>10	>10	IGHV1-69	IGHJ6	IGKV3-15	IGKJ1	0.084	0.0338
BD57-0163	BA.5 BTI	F1	>10	>10	>10	>10	>10	>10	>10	IGHV6-1	IGHJ4	IGKV3-15	IGKJ3	0.0277	0.0185
BD57-0164	BA.5 BTI	E2.2	2.80	0.540	1.02	2.23	2.30	1.92	2.36	IGHV3-15	IGHJ3	IGKV3-20	IGKJ2	0.0338	0.0338
BD57-0165	BA.5 BTI	A1	0.00443	0.00437	0.00603	0.00714	0.380	0.436	0.894	IGHV3-66	IGHJ4	IGKV1-9	IGKJ5	0.0653	0.0124
BD57-0167	BA.5 BTI	E3	1.82	0.538	1.03	0.682	0.796	0.825	1.39	IGHV5-51	IGHJ4	IGLV3-21	IGLJ1	0.0475	0.065
BD57-0168	BA.5 BTI	C/D1	0.000730	0.233	0.235	0.817	0.855	>10	>10	IGHV1-69	IGHJ5	IGKV1-39	IGKJ1	0.0957	0.0435
BD57-0169	BA.5 BTI	E1/E2.1	0.00116	>10	0.392	1.09	>10	>10	>10	IGHV4-31	IGHJ4	IGLV3-9	IGLJ2	0.0312	0.0439
BD57-0170	BA.5 BTI	E1/E2.1	0.000663	0.000736	0.000746	0.000526	3.90	0.107	0.223	IGHV1-69	IGHJ3	IGKV4-1	IGKJ2	0.0602	0.0233
BD57-0171	BA.5 BTI	D2	0.00312	>10	>10	1.81	>10	>10	>10	IGHV5-51	IGHJ4	IGKV3-15	IGKJ1	0.0443	0.0246
BD57-0172	BA.5 BTI	D3	>10	1.22	0.203	0.263	2.04	>10	>10	IGHV5-51	IGHJ4	IGLV1-44	IGLJ2	0.0141	0.009
BD57-0173	BA.5 BTI	E1/E2.1	0.487	2.22	2.62	4.24	>10	6.18	>10	IGHV1-18	IGHJ6	IGKV1-39	IGKJ3	0.0656	0.0281
BD57-0174	BA.5 BTI	D2	0.0529	>10	0.0366	0.0364	>10	>10	>10	IGHV2-70	IGHJ4	IGLV1-44	IGLJ1	0.0329	0.0423
BD57-0175	BA.5 BTI	D2	0.00105	>10	2.08	7.31	>10	>10	>10	IGHV5-51	IGHJ4	IGKV3-15	IGKJ1	0.0748	0.0338
BD57-0176	BA.5 BTI	E1/E2.1	0.000892	>10	0.0374	0.0396	2.37	>10	>10	IGHV4-59	IGHJ4	IGKV1-5	IGKJ1	0.0757	0.0708
BD57-0177	BA.5 BTI	E1/E2.1	0.0270	0.0762	0.0570	0.0832	>10	>10	>10	IGHV1-69	IGHJ6	IGKV1-33	IGKJ5	0.0564	0.0404
BD57-0178	BA.5 BTI	E2.2	4.99	2.08	3.87	4.63	7.71	2.55	1.57	IGHV1-69	IGHJ6	IGKV1-33	IGKJ4	0.064	0.0435
BD57-0179	BA.5 BTI	E2.2	5.93	3.16	3.78	9.08	>10	6.60	3.65	IGHV3-9	IGHJ3	IGKV3-15	IGKJ2	0.0431	0.0343
BD57-0180	BA.5 BTI	E1/E2.1	>10	>10	>10	>10	>10	>10	>10	IGHV3-15	IGHJ3	IGKV1-39	IGKJ1	0	0
BD57-0181	BA.5 BTI	E2.2	>10	1.60	1.67	>10	>10	1.40	2.63	IGHV4-31	IGHJ4	IGKV1-33	IGKJ5	0.0769	0.0342
BD57-0182	BA.5 BTI	A1	0.00645	0.0385	0.0656	0.184	>10	>10	>10	IGHV3-66	IGHJ6	IGKV1-9	IGKJ4	0.0456	0.0442
BD57-0183	BA.5 BTI	F1	>10	>10	>10	>10	>10	>10	>10	IGHV3-9	IGHJ4	IGLV3-25	IGLJ2	0.0575	0.0347
BD57-0184	BA.5 BTI	E3	0.952	0.422	0.615	0.495	0.654	1.00	0.735	IGHV5-51	IGHJ4	IGLV1-44	IGLJ3	0.0275	0.0242
BD57-0185	BA.5 BTI	E1/E2.1	0.0178	0.0651	0.0547	0.0786	>10	2.22	5.02	IGHV4-59	IGHJ3	IGKV1-39	IGKJ1	0.0602	0.028
BD57-0186	BA.5 BTI	E3	1.25	0.341	0.615	0.944	2.20	1.96	1.86	IGHV1-69	IGHJ6	IGLV3-25	IGLJ2	0.0599	0.0338
BD57-0187	BA.5 BTI	E2.2	>10	2.65	2.76	2.76	>10	2.13	2.94	IGHV3-30	IGHJ5	IGLV3-21	IGLJ1	0.0375	0.0246
BD57-0188	BA.5 BTI	E3	>10	>10	>10	>10	>10	>10	>10	IGHV3-9	IGHJ4	IGKV3-20	IGKJ4	0.0622	0.0308
BD57-0189	BA.5 BTI	D2	2.20	>10	0.178	0.0735	>10	>10	>10	IGHV2-70	IGHJ4	IGLV1-51	IGLJ2	0.03	0.0302
BD57-0190	BA.5 BTI	F1	>10	>10	>10	>10	>10	>10	>10	IGHV3-30	IGHJ4	IGKV1-39	IGKJ4	0.0297	0.0185
BD57-0191	BA.5 BTI	D2	0.0288	3.23	0.0202	0.0218	>10	4.14	3.98	IGHV2-70	IGHJ4	IGLV1-44	IGLJ1	0.0192	0.0211
BD57-0192	BA.5 BTI	F1	>10	>10	>10	>10	>10	>10	>10	IGHV3-33	IGHJ4	IGLV6-57	IGLJ3	0.0447	0.0423
BD57-0193	BA.5 BTI	E2.2	>10	3.83	3.90	3.97	>10	3.56	3.70	IGHV5-51	IGHJ4	IGKV3-20	IGKJ4	0.0343	0.0431
BD57-0194	BA.5 BTI	E1/E2.1	0.0142	0.174	0.120	0.143	2.94	0.403	0.942	IGHV3-9	IGHJ4	IGKV1-33	IGKJ4	0.0767	0.0435
BD57-0195	BA.5 BTI	E2.2	>10	1.20	2.04	2.85	>10	2.00	0.898	IGHV4-31	IGHJ5	IGLV1-51	IGLJ2	0.0388	0.0456
BD57-0196	BA.5 BTI	F1	>10	>10	>10	>10	>10	>10	>10	IGHV2-26	IGHJ5	IGLV3-25	IGLJ2	0.013	0.0125
BD57-0197	BA.5 BTI	D2	<0.0005	>10	0.0176	0.0242	1.27	>10	>10	IGHV1-46	IGHJ3	IGKV4-1	IGKJ4	0.0934	0.0441
BD57-0198	BA.5 BTI	E1/E2.1	>10	>10	>10	>10	>10	>10	>10	IGHV4-31	IGHJ3	IGKV1-33	IGKJ1	0.033	0.0093
BD57-0200	BA.5 BTI	E2.2	1.46	0.556	0.720	1.38	2.95	2.28	1.05	IGHV3-33	IGHJ6	IGLV1-51	IGLJ3	0.0651	0.0483
BD57-0201	BA.5 BTI	E3	>10	>10	>10	>10	>10	>10	>10	IGHV1-46	IGHJ3	IGKV3-11	IGKJ1	0.0247	0.0061
BD57-0204	BA.5 BTI	C/D1	>10	>10	>10	>10	>10	>10	>10	IGHV5-51	IGHJ3	IGKV4-1	IGKJ4	0.0607	0.0235
BD57-0205	BA.5 BTI	D3	0.00327	0.00219	0.00498	0.00678	3.33	3.31	6.10	IGHV5-51	IGHJ4	IGKV1-33	IGKJ1	0.0307	0.0338
BD57-0206	BA.5 BTI	E2.2	>10	1.19	1.09	0.768	>10	0.754	0.422	IGHV3-33	IGHJ4	IGKV2-30	IGKJ1	0.0554	0.0386
BD57-0207	BA.5 BTI	C/D1	0.000695	>10	>10	2.87	5.46	>10	>10	IGHV1-69	IGHJ6	IGLV2-8	IGLJ2	0.0708	0.0242
BD57-0208	BA.5 BTI	E1/E2.1	0.00149	0.000947	<0.0005	0.635	>10	>10	>10	IGHV1-69	IGHJ4	IGKV1-33	IGKJ4	0.0922	0.0248
BD57-0209	BA.5 BTI	F1	>10	>10	>10	>10	>10	>10	>10	IGHV3-23	IGHJ4	IGKV1-39	IGKJ2	0.0463	0.0338
BD57-0210	BA.5 BTI	F1	0.197	1.31	1.85	1.65	2.65	2.61	1.22	IGHV3-53	IGHJ3	IGLV6-57	IGLJ3	0.0507	0.0148
BD57-0212	BA.5 BTI	F1	4.63	3.44	3.05	2.61	3.99	3.26	2.05	IGHV3-13	IGHJ4	IGKV1-39	IGKJ4	0.0332	0.0308
BD57-0213	BA.5 BTI	A1	0.0148	0.0122	0.0136	0.0174	>10	>10	>10	IGHV3-66	IGHJ4	IGKV3-20	IGKJ2	0.0676	0.0215
BD57-0215	BA.5 BTI	D2	<0.0005	>10	0.00169	3.78	>10	>10	>10	IGHV1-69	IGHJ2	IGKV1-33	IGKJ5	0.0486	0.0215
BD57-0216	BA.5 BTI	F1	0.00728	0.0829	0.0925	0.0920	>10	>10	>10	IGHV4-39	IGHJ4	IGLV6-57	IGLJ2	0.072	0.036
BD57-0217	BA.5 BTI	F1	>10	>10	>10	>10	>10	>10	>10	IGHV3-13	IGHJ6	IGKV1-39	IGKJ1	0.0413	0.0462
BD57-0218	BA.5 BTI	E1/E2.1	0.413	1.05	1.31	1.97	>10	>10	>10	IGHV1-18	IGHJ6	IGKV1-39	IGKJ3	0.0437	0.0376
BD57-0220	BA.5 BTI	E3	>10	>10	>10	>10	>10	>10	>10	IGHV1-46	IGHJ4	IGKV3-11	IGKJ3	0.079	0.0332
BD57-0222	BA.5 BTI	E2.2	1.64	0.605	0.336	0.352	2.43	1.87	1.38	IGHV5-51	IGHJ4	IGKV3D-20	IGKJ4	0.0459	0.0369
BD57-0223	BA.5 BTI	E1/E2.1	0.0142	0.0308	0.0216	0.122	>10	8.79	>10	IGHV3-15	IGHJ2	IGLV2-11	IGLJ1	0.025	0.009
BD57-0224	BA.5 BTI	E2.2	>10	>10	>10	>10	>10	>10	>10	IGHV3-30	IGHJ3	IGLV3-21	IGLJ2	0.0432	0.0158
BD57-0225	BA.5 BTI	E1/E2.1	<0.0005	0.000831	0.00130	0.00232	>10	0.333	0.196	IGHV1-69	IGHJ3	IGKV4-1	IGKJ2	0.0681	0.0262
BD57-0226	BA.5 BTI	F1	0.334	>10	>10	>10	>10	>10	>10	IGHV3-30	IGHJ3	IGLV1-47	IGLJ3	0.039	0.0393
BD57-0227	BA.5 BTI	F1	>10	>10	>10	>10	>10	>10	>10	IGHV3-30	IGHJ4	IGLV3-21	IGLJ2	0.0347	0.0338
BD57-0228	BA.5 BTI	F1	>10	>10	>10	>10	>10	>10	>10	IGHV4-39	IGHJ5	IGKV3-11	IGKJ4	0.0665	0.0091
BD57-0230	BA.5 BTI	F1	>10	>10	>10	>10	>10	>10	>10	IGHV3-30-3	IGHJ4	IGKV1-39	IGKJ1	0.0499	0.0308
BD57-0231	BA.5 BTI	C/D1	0.00123	>10	>10	0.407	0.379	2.28	1.57	IGHV1-18	IGHJ4	IGKV3-20	IGKJ4	0.0763	0.053
BD57-0235	BA.5 BTI	E3	>10	1.88	2.11	2.45	8.28	2.07	2.80	IGHV1-18	IGHJ6	IGLV3-25	IGLJ2	0.0388	0.0246
BD57-0236	BA.5 BTI	E2.2	>10	>10	>10	>10	>10	>10	>10	IGHV3-9	IGHJ4	IGLV3-21	IGLJ1	0.0495	0.0242
BD57-0237	BA.5 BTI	E1/E2.1	>10	>10	>10	0.630	>10	>10	>10	IGHV3-15	IGHJ2	IGKV1-33	IGKJ4	0.0077	0.0031
BD57-0239	BA.5 BTI	E1/E2.1	0.00623	0.0368	0.0247	0.0351	>10	3.06	3.28	IGHV1-69	IGHJ6	IGLV2-14	IGLJ1	0.0291	0.015
BD57-0240	BA.5 BTI	E3	>10	>10	>10	>10	>10	>10	>10	IGHV3-30	IGHJ4	IGKV1-33	IGKJ4	0.0288	0.0217
BD57-0241	BA.5 BTI	F1	0.764	3.41	2.48	2.30	3.69	2.79	4.32	IGHV3-30-3	IGHJ4	IGKV1-39	IGKJ1	0.0499	0.0431
BD57-0242	BA.5 BTI	E1/E2.1	0.00109	0.00961	0.00934	0.0361	>10	3.06	4.40	IGHV1-69	IGHJ5	IGLV2-14	IGLJ1	0.0531	0.0545
BD57-0243	BA.5 BTI	A1	0.00425	0.00480	0.00815	0.0125	1.18	1.32	0.596	IGHV3-66	IGHJ3	IGKV3-20	IGKJ2	0.0507	0.0152
BD57-0244	BA.5 BTI	E2.2	0.145	0.333	0.270	>10	>10	>10	>10	IGHV2-26	IGHJ5	IGLV3-21	IGLJ2	0.0272	0.0123
BD57-0245	BA.5 BTI	F1	0.726	4.64	4.91	4.30	2.46	5.14	7.91	IGHV3-30	IGHJ4	IGKV1-39	IGKJ1	0.0416	0.0123
BD57-0246	BA.5 BTI	D3	>10	>10	0.511	0.389	>10	>10	>10	IGHV5-51	IGHJ3	IGLV3-21	IGLJ1	0.0028	0.0031
BD57-0247	BA.5 BTI	F1	>10	>10	>10	>10	>10	>10	>10	IGHV3-13	IGHJ2	IGKV1-39	IGKJ5	0.0327	0.0186
BD57-0248	BA.5 BTI	F1	>10	>10	>10	>10	>10	>10	>10	IGHV3-13	IGHJ6	IGKV1-39	IGKJ2	0.0317	0.0369
BD57-0250	BA.5 BTI	F1	>10	>10	>10	>10	>10	>10	>10	IGHV3-13	IGHJ4	IGKV1-39	IGKJ1	0.0054	0.0123
BD57-0253	BA.5 BTI	F3	>10	>10	>10	>10	>10	>10	>10	IGHV2-5	IGHJ5	IGKV3-11	IGKJ5	0.0053	0.0062
BD57-0254	BA.5 BTI	A1	0.00575	0.00764	0.00641	0.00588	2.11	2.24	3.06	IGHV3-66	IGHJ5	IGKV1-33	IGKJ4	0.0503	0.0187
BD57-0255	BA.5 BTI	F1	0.183	>10	2.86	2.41	3.28	3.19	1.55	IGHV4-39	IGHJ6	IGLV6-57	IGLJ2	0.0556	0.0571
BD57-0256	BA.5 BTI	F1	>10	>10	>10	>10	>10	>10	>10	IGHV3-64D	IGHJ4	IGKV1-39	IGKJ2	0.0332	0.0186
BD57-0257	BA.5 BTI	D4	>10	>10	>10	>10	>10	>10	>10	IGHV1-69	IGHJ4	IGKV2D-29	IGKJ2	0.0582	0.0449
BD57-0258	BA.5 BTI	E2.2	>10	>10	>10	>10	>10	>10	>10	IGHV3-9	IGHJ4	IGLV3-21	IGLJ2	0.0466	0.035
BD57-0259	BA.5 BTI	E1/E2.1	0.210	0.598	0.309	0.0918	>10	>10	>10	IGHV1-69	IGHJ6	IGKV3-20	IGKJ5	0.0582	0.0466
BD57-0260	BA.5 BTI	F1	0.0164	0.384	>10	>10	>10	>10	>10	IGHV1-69	IGHJ6	IGKV1-33	IGKJ4	0.0997	0.0528
BD57-0261	BA.5 BTI	C/D1	0.00365	0.112	0.204	>10	>10	>10	>10	IGHV1-46	IGHJ4	IGLV7-43	IGLJ3	0.0443	0.0427
BD57-0262	BA.5 BTI	C/D1	0.00160	>10	>10	0.0413	0.163	>10	>10	IGHV1-69	IGHJ6	IGLV2-8	IGLJ2	0.0683	0.0273
BD57-0263	BA.5 BTI	A1	0.00383	0.00117	0.00273	0.0211	0.0578	>10	>10	IGHV3-30	IGHJ4	IGKV1-39	IGKJ1	0.0319	0.0466
BD57-0264	BA.5 BTI	A1	0.00303	0.0716	0.0963	0.0629	0.537	0.620	1.16	IGHV1-69	IGHJ5	IGLV1-40	IGLJ2	0.0759	0.0269
BD57-0265	BA.5 BTI	E2.2	>10	6.51	>10	5.67	4.95	2.69	6.35	IGHV4-59	IGHJ6	IGKV1-12	IGKJ1	0.0523	0.0217
BD57-0266	BA.5 BTI	E1/E2.1	0.0167	0.658	0.786	>10	>10	>10	>10	IGHV4-34	IGHJ3	IGKV1-16	IGKJ2	0.0412	0.0217
BD57-0267	BA.5 BTI	D2	0.00161	0.00506	0.0129	0.0173	0.313	1.79	1.82	IGHV4-59	IGHJ5	IGLV1-40	IGLJ2	0.0627	0.024
BD57-0269	BA.5 BTI	B	0.00270	0.00183	0.00257	0.00322	0.0854	>10	>10	IGHV1-58	IGHJ3	IGKV3-20	IGKJ2	0.0432	0.0431
BD57-0270	BA.5 BTI	E2.2	5.34	6.18	4.08	5.41	7.12	5.00	7.41	IGHV4-31	IGHJ4	IGKV1-33	IGKJ4	0.0632	0.0338
BD57-0271	BA.5 BTI	A1	0.00323	0.00443	0.00687	0.00957	1.09	2.78	1.97	IGHV3-66	IGHJ3	IGKV1-9	IGKJ1	0.0587	0.0185
BD57-0272	BA.5 BTI	E1/E2.1	0.614	0.275	0.969	0.637	>10	4.17	8.18	IGHV3-33	IGHJ6	IGLV2-11	IGLJ1	0.0469	0.0272
BD57-0274	BA.5 BTI	D2	>10	>10	0.492	0.216	>10	>10	>10	IGHV2-5	IGHJ4	IGKV3-15	IGKJ3	0.0396	0.0373
BD57-0277	BA.5 BTI	D4	>10	2.24	1.85	0.158	>10	>10	>10	IGHV5-51	IGHJ4	IGKV1-5	IGKJ1	0.0109	0.0031
BD57-0279	BA.5 BTI	E2.2	4.42	>10	>10	>10	>10	>10	>10	IGHV4-31	IGHJ4	IGLV3-21	IGLJ1	0.0239	0.0244
BD57-0281	BA.5 BTI	D2	0.000832	>10	0.0170	0.0151	>10	>10	>10	IGHV2-70	IGHJ4	IGLV2-23	IGLJ1	0.0268	0.021
BD57-0282	BA.5 BTI	F1	1.70	3.16	2.35	3.04	4.22	4.64	6.92	IGHV3-30	IGHJ4	IGKV1-39	IGKJ4	0.0549	0.0462
BD57-0283	BA.5 BTI	E2.2	2.34	0.848	1.45	1.12	1.66	2.60	1.33	IGHV5-51	IGHJ4	IGKV1-12	IGKJ4	0.03	0.028
BD57-0285	BA.5 BTI	A1	0.00315	0.661	1.11	1.19	3.09	>10	>10	IGHV3-30	IGHJ6	IGKV1-13	IGKJ1	0.04	0.0218
BD57-0286	BA.5 BTI	E3	>10	>10	>10	>10	>10	>10	>10	IGHV1-69	IGHJ4	IGKV2-29	IGKJ4	0.0718	0.0504
BD57-0288	BA.5 BTI	E1/E2.1	0.0974	0.106	0.0960	0.446	>10	6.66	>10	IGHV3-9	IGHJ6	IGLV2-14	IGLJ2	0.0699	0.0242
BD57-0290	BA.5 BTI	E2.2	4.41	1.77	3.69	3.60	7.78	3.98	3.08	IGHV3-15	IGHJ6	IGKV1-5	IGKJ1	0.0373	0.0186
BD57-0291	BA.5 BTI	E2.2	>10	2.31	5.78	3.19	>10	2.82	6.09	IGHV3-30	IGHJ4	IGLV3-21	IGLJ1	0.0607	0.0475
BD57-0293	BA.5 BTI	D2	0.00127	>10	0.122	0.0624	>10	>10	>10	IGHV4-31	IGHJ4	IGKV2-24	IGKJ1	0.0595	0.0208
BD57-0295	BA.5 BTI	E2.2	1.31	0.426	1.37	0.735	1.20	1.02	0.415	IGHV5-51	IGHJ4	IGLV2-8	IGLJ2	0.0335	0.0332
BD57-0296	BA.5 BTI	D2	0.00141	>10	0.0437	0.0265	>10	>10	>10	IGHV1-18	IGHJ4	IGKV3-20	IGKJ4	0.0592	0.028
BD57-0297	BA.5 BTI	E1/E2.1	0.00115	0.00145	0.000810	0.000927	>10	0.0529	0.623	IGHV1-69	IGHJ3	IGKV4-1	IGKJ2	0.0654	0.0233
BD57-0298	BA.5 BTI	A1	>10	>10	>10	0.0864	>10	>10	>10	IGHV4-59	IGHJ6	IGLV1-40	IGLJ3	0.0601	0.0359
BD57-0299	BA.5 BTI	E2.2	>10	3.59	4.11	3.07	>10	2.47	1.10	IGHV3-30	IGHJ3	IGLV3-21	IGLJ2	0.0612	0.0316
BD57-0300	BA.5 BTI	F3	>10	>10	>10	>10	>10	>10	>10	IGHV2-5	IGHJ4	IGKV1-5	IGKJ2	0.0054	0.0031
BD57-0301	BA.5 BTI	F1	0.0715	0.249	>10	5.07	>10	>10	>10	IGHV3-43	IGHJ6	IGLV1-40	IGLJ3	0.0389	0.0359
BD57-0302	BA.5 BTI	E2.2	1.54	0.586	0.557	1.18	2.29	2.01	2.56	IGHV5-51	IGHJ4	IGKV3-11	IGKJ4	0.0282	0.0323
BD57-0303	BA.5 BTI	E1/E2.1	0.00132	0.0632	0.00141	0.00594	>10	>10	>10	IGHV1-69	IGHJ1	IGKV1-33	IGKJ3	0.0907	0.0439
BD57-0304	BA.5 BTI	D2	0.00272	0.00906	0.00634	0.00420	>10	>10	--	IGHV3-9	IGHJ6	IGKV1-9	IGKJ5	0.0187	0.0219
BD57-0305	BA.5 BTI	F1	>10	2.34	1.29	0.629	1.38	>10	>10	IGHV3-20	IGHJ4	IGLV6-57	IGLJ2	0.0163	0.006
BD57-0306	BA.5 BTI	E2.2	>10	2.28	3.32	7.47	5.06	4.20	4.05	IGHV4-31	IGHJ4	IGKV1-33	IGKJ5	0.0577	0.0311
BD57-0307	BA.5 BTI	C/D1	0.00358	0.360	0.552	2.21	>10	>10	>10	IGHV1-46	IGHJ4	IGLV7-43	IGLJ3	0.0385	0.0366
BD57-0308	BA.5 BTI	A2	>10	>10	>10	>10	>10	>10	>10	IGHV3-30	IGHJ6	IGKV4-1	IGKJ1	0.0707	0.0529
BD57-0309	BA.5 BTI	A1	0.00818	0.0101	0.00529	0.00349	0.0371	0.0209	0.0128	IGHV3-66	IGHJ6	IGKV1-9	IGKJ4	0.0616	0.0326
BD57-0310	BA.5 BTI	F1	>10	>10	>10	>10	>10	>10	>10	IGHV3-33	IGHJ4	IGKV3-15	IGKJ3	0.0302	0.0125
BD57-0311	BA.5 BTI	E1/E2.1	0.00292	5.01	0.0141	0.00804	>10	>10	>10	IGHV3-30	IGHJ6	IGKV1-12	IGKJ2	0.0499	0.0562
BD57-0312	BA.5 BTI	E3	3.58	4.46	6.90	9.31	8.36	5.74	>10	IGHV3-9	IGHJ4	IGLV2-23	IGLJ2	0.0375	0.0423
BD57-0313	BA.5 BTI	E1/E2.1	0.0959	0.227	0.227	0.181	>10	>10	>10	IGHV1-69	IGHJ6	IGKV3-20	IGKJ2	0.0667	0.0497
BD57-0314	BA.5 BTI	E3	>10	>10	>10	>10	>10	>10	>10	IGHV1-46	IGHJ3	IGKV1-5	IGKJ1	0.0463	0.041
BD57-0315	BA.5 BTI	E1/E2.1	0.0211	0.0704	0.0844	0.433	>10	>10	>10	IGHV3-9	IGHJ6	IGLV1-40	IGLJ1	0.048	0.003
BD57-0316	BA.5 BTI	F1	0.695	4.68	3.34	7.09	>10	8.97	4.41	IGHV3-9	IGHJ5	IGKV4-1	IGKJ4	0.027	0.0206
BD57-0318	BA.5 BTI	F3	>10	>10	>10	>10	>10	>10	>10	IGHV2-5	IGHJ4	IGKV3-15	IGKJ3	0.008	0.0062
BD57-0319	BA.5 BTI	F1	8.68	3.39	3.82	3.08	2.44	4.98	3.72	IGHV3-13	IGHJ6	IGKV1-39	IGKJ1	0.0753	0.0277
BD57-0320	BA.5 BTI	E3	1.77	2.38	1.88	4.31	3.56	3.94	3.60	IGHV3-9	IGHJ4	IGKV3-15	IGKJ5	0.0297	0.0061
BD57-0322	BA.5 BTI	F1	>10	>10	>10	>10	>10	>10	>10	IGHV3-13	IGHJ2	IGKV1-39	IGKJ5	0.0305	0.0277
BD57-0324	BA.5 BTI	E1/E2.1	0.0320	0.105	0.0851	0.159	>10	0.286	0.116	IGHV3-9	IGHJ4	IGKV1-33	IGKJ4	0.0409	0.0186
BD57-0325	BA.5 BTI	A2	>10	>10	0.878	0.000751	0.00247	0.00594	0.00616	IGHV4-39	IGHJ4	IGLV1-40	IGLJ3	0.0297	0.0148
BD57-0326	BA.5 BTI	E1/E2.1	0.0249	0.243	0.493	0.0331	>10	>10	>10	IGHV1-2	IGHJ4	IGKV1-39	IGKJ4	0.0622	0.0462
BD57-0329	BA.5 BTI	F1	>10	>10	>10	>10	>10	>10	>10	IGHV3-13	IGHJ6	IGKV1-39	IGKJ5	0.0495	0.0155
BD57-0330	BA.5 BTI	E2.2	>10	2.40	2.25	>10	>10	2.51	1.19	IGHV1-2	IGHJ6	IGLV3-21	IGLJ2	0.0298	0.0308
BD57-0331	BA.5 BTI	E2.2	0.166	0.0399	0.0452	0.432	>10	0.250	0.393	IGHV1-69	IGHJ4	IGLV1-40	IGLJ3	0.0617	0.024
BD57-0332	BA.5 BTI	F1	>10	>10	>10	>10	>10	>10	>10	IGHV4-39	IGHJ5	IGKV1D-12	IGKJ4	0.0757	0.0652
BD57-0333	BA.5 BTI	E2.2	3.45	3.40	3.42	4.78	>10	3.72	5.22	IGHV1-69	IGHJ4	IGKV3-20	IGKJ2	0.0712	0.0308
BD57-0334	BA.5 BTI	E3	>10	>10	>10	>10	>10	>10	>10	IGHV2-5	IGHJ5	IGKV3-11	IGKJ2	0.0665	0.0335
BD57-0335	BA.5 BTI	E1/E2.1	0.00588	0.0401	0.0279	0.0308	>10	>10	>10	IGHV3-21	IGHJ6	IGLV2-14	IGLJ3	0.0476	0.021
BD57-0336	BA.5 BTI	E2.2	1.31	>10	>10	>10	>10	>10	>10	IGHV3-30	IGHJ4	IGLV6-57	IGLJ3	0.0412	0.0181
BD57-0338	BA.5 BTI	E1/E2.1	0.0278	0.0217	0.0116	0.00331	0.673	0.742	0.404	IGHV1-24	IGHJ4	IGKV3-20	IGKJ5	0.0505	0.0554
BD57-0340	BA.5 BTI	E1/E2.1	0.673	0.502	0.717	1.66	>10	>10	>10	IGHV3-33	IGHJ4	IGLV3-25	IGLJ3	0.0163	0.0215
BD57-0341	BA.5 BTI	E1/E2.1	0.00629	0.0164	0.0233	0.0127	>10	>10	>10	IGHV4-59	IGHJ3	IGKV1-39	IGKJ1	0.0759	0.0652
BD57-0342	BA.5 BTI	F1	>10	>10	>10	>10	>10	>10	>10	IGHV1-69	IGHJ6	IGKV1-5	IGKJ1	0.027	0.0439
BD57-0343	BA.5 BTI	E1/E2.1	0.161	0.108	0.337	0.455	>10	>10	>10	IGHV3-33	IGHJ6	IGLV2-11	IGLJ1	0.0521	0.0332
BD57-0345	BA.5 BTI	E1/E2.1	0.00180	0.147	0.162	3.54	>10	>10	>10	IGHV1-69	IGHJ4	IGKV1-33	IGKJ4	0.0475	0.0155
BD57-0346	BA.5 BTI	A1	0.00716	1.31	1.27	0.190	0.473	>10	>10	IGHV3-7	IGHJ4	IGKV1-NL1	IGKJ1	0.0305	0.0404
BD57-0347	BA.5 BTI	A1	>10	>10	>10	0.0840	>10	>10	>10	IGHV3-53	IGHJ4	IGKV3-11	IGKJ4	0.008	0.0062
BD57-0348	BA.5 BTI	E3	>10	>10	>10	>10	>10	>10	>10	IGHV1-46	IGHJ3	IGKV1-5	IGKJ1	0.0218	0.0221
BD57-0350	BA.5 BTI	C/D1	0.000947	>10	>10	>10	>10	>10	>10	IGHV1-2	IGHJ6	IGLV2-14	IGLJ2	0.0551	0.0517
BD57-0351	BA.5 BTI	D2	0.000963	>10	0.00198	0.000883	>10	>10	>10	IGHV2-70	IGHJ4	IGLV1-51	IGLJ3	0.049	0.0212
BD57-0352	BA.5 BTI	E3	>10	2.01	3.43	3.99	>10	>10	>10	IGHV1-18	IGHJ3	IGLV3-27	IGLJ3	0.0442	0.0376
BD57-0353	BA.5 BTI	A1	0.00447	0.570	0.508	0.565	>10	>10	>10	IGHV3-53	IGHJ6	IGKV1-9	IGKJ4	0.0519	0.0342
BD57-0354	BA.5 BTI	A2	0.00687	1.41	0.0239	0.00708	>10	>10	>10	IGHV3-48	IGHJ4	IGKV3-11	IGKJ5	0.0165	0.0062
BD57-0355	BA.5 BTI	C/D1	0.00149	>10	>10	2.60	>10	>10	>10	IGHV1-69	IGHJ1	IGKV3-20	IGKJ1	0.0818	0.0277
BD57-0356	BA.5 BTI	C/D1	0.000868	0.0621	0.00378	0.646	>10	>10	>10	IGHV1-69	IGHJ1	IGKV3-20	IGKJ1	0.106	0.0462
BD57-0357	BA.5 BTI	C/D1	0.00117	3.08	0.0895	>10	>10	>10	>10	IGHV1-8	IGHJ6	IGKV1-9	IGKJ4	0.0709	0.0404
BD57-0358	BA.5 BTI	E2.2	4.40	0.783	0.433	0.544	1.30	0.896	2.20	IGHV5-51	IGHJ3	IGLV2-23	IGLJ3	0.0247	0.0269
BD57-0359	BA.5 BTI	A1	0.000916	>10	>10	>10	>10	>10	>10	IGHV1-2	IGHJ6	IGLV2-14	IGLJ2	0.0262	0.0214
BD57-0360	BA.5 BTI	E1/E2.1	0.0152	0.0101	0.0112	0.0413	>10	0.0739	0.132	IGHV3-9	IGHJ4	IGKV1-33	IGKJ4	0.0793	0.0404
BD57-0361	BA.5 BTI	F1	0.0667	2.15	3.16	2.80	2.26	1.82	4.26	IGHV3-9	IGHJ4	IGLV1-44	IGLJ3	0.0463	0.0453
BD57-0362	BA.5 BTI	E3	>10	>10	>10	>10	>10	>10	>10	IGHV3-21	IGHJ4	IGLV2-14	IGLJ2	0.0429	0.0335
BD57-0363	BA.5 BTI	E2.2	>10	3.30	4.28	6.60	5.72	5.93	8.61	IGHV3-15	IGHJ3	IGKV3-20	IGKJ1	0.039	0.0246
BD57-0366	BA.5 BTI	E1/E2.1	0.0111	0.0189	0.0191	0.00770	>10	>10	>10	IGHV1-69	IGHJ6	IGLV7-46	IGLJ3	0.0714	0.0511
BD57-0370	BA.5 BTI	A2	>10	>10	0.0628	0.00106	0.00393	0.00842	0.00613	IGHV4-39	IGHJ5	IGLV1-40	IGLJ3	0.0081	0.012
BD57-0371	BA.5 BTI	E2.2	0.446	0.140	0.128	0.564	>10	>10	>10	IGHV1-69	IGHJ4	IGLV1-40	IGLJ2	0.0456	0.018
BD57-0372	BA.5 BTI	A1	0.00478	0.00291	0.00304	0.00541	0.459	1.06	1.08	IGHV3-66	IGHJ4	IGKV1-33	IGKJ2	0.0554	0.0466
BD57-0373	BA.5 BTI	E2.2	4.02	0.846	0.890	1.68	2.05	1.91	1.74	IGHV1-69	IGHJ6	IGKV1-33	IGKJ4	0.0453	0.0342
BD57-0374	BA.5 BTI	E1/E2.1	0.0236	0.102	0.0746	0.0690	>10	3.21	1.29	IGHV3-9	IGHJ6	IGLV1-40	IGLJ1	0.048	0.024
BD57-0375	BA.5 BTI	B	0.00129	0.00280	0.00221	0.0963	0.452	>10	>10	IGHV1-58	IGHJ3	IGKV3-20	IGKJ1	0.0757	0.0277
BD57-0376	BA.5 BTI	E2.2	3.17	>10	>10	>10	>10	>10	>10	IGHV3-9	IGHJ4	IGLV3-21	IGLJ2	0.0109	0.0127
BD57-0377	BA.5 BTI	F1	>10	>10	>10	>10	>10	>10	>10	IGHV3-13	IGHJ4	IGKV1-39	IGKJ4	0.0354	0.0277
BD57-0378	BA.5 BTI	F1	0.119	0.125	>10	>10	>10	>10	>10	IGHV1-69	IGHJ1	IGLV1-40	IGLJ1	0.026	0.015
BD57-0379	BA.5 BTI	F1	0.391	>10	>10	>10	>10	>10	>10	IGHV3-30	IGHJ6	IGKV3-20	IGKJ5	0.0376	0.0213
BD57-0380	BA.5 BTI	F1	0.507	>10	>10	>10	>10	>10	>10	IGHV3-30	IGHJ3	IGLV1-47	IGLJ3	0.0526	0.0363
BD57-0381	BA.5 BTI	A2	>10	>10	>10	0.184	2.88	4.05	6.66	IGHV3-30	IGHJ6	IGKV2-28	IGKJ3	0.0157	0
BD57-0383	BA.5 BTI	F3	>10	>10	>10	0.282	0.590	3.09	1.69	IGHV1-58	IGHJ4	IGKV1-33	IGKJ2	0.0111	0.0031
BD57-0385	BA.5 BTI	B	0.00357	0.00626	0.00429	9.71	>10	>10	>10	IGHV1-58	IGHJ3	IGKV3-20	IGKJ1	0.073	0.0215
BD57-0386	BA.5 BTI	A1	0.00973	0.0438	0.00655	0.00715	4.50	>10	>10	IGHV3-53	IGHJ4	IGKV1-33	IGKJ2	0.0302	0.0277
BD57-0388	BA.5 BTI	E3	>10	>10	>10	>10	>10	>10	>10	IGHV1-18	IGHJ4	IGKV1-5	IGKJ2	0.0654	0.0408
BD57-0389	BA.5 BTI	E2.2	>10	1.49	3.16	3.76	1.33	1.21	0.667	IGHV3-30	IGHJ4	IGKV1-39	IGKJ4	0.0351	0.0528
BD57-0390	BA.5 BTI	F1	>10	>10	>10	>10	>10	>10	>10	IGHV3-30	IGHJ4	IGKV3-15	IGKJ3	0.0632	0.0157
BD57-0393	BA.5 BTI	E2.2	>10	3.74	1.65	3.21	3.74	1.77	2.02	IGHV3-30	IGHJ4	IGKV1-39	IGKJ4	0.0514	0.0373
BD57-0394	BA.5 BTI	A1	0.00610	0.00293	0.00462	0.00370	0.0195	0.0561	0.0347	IGHV3-53	IGHJ4	IGKV1-33	IGKJ2	0.0824	0.0523
BD57-0395	BA.5 BTI	D2	>10	>10	>10	1.43	>10	>10	>10	IGHV1-46	IGHJ4	IGLV2-14	IGLJ2	0.0082	0.012
BD57-0396	BA.5 BTI	E1/E2.1	0.0309	0.0301	0.00821	0.0581	>10	>10	>10	IGHV1-24	IGHJ4	IGKV3-20	IGKJ5	0.0319	0.0492
BD57-0397	BA.5 BTI	E2.2	>10	>10	>10	>10	>10	>10	>10	IGHV3-23	IGHJ4	IGKV1-33	IGKJ3	0.0803	0.0373
BD57-0398	BA.5 BTI	A2	>10	>10	>10	>10	>10	>10	>10	IGHV2-5	IGHJ5	IGKV3D-15	IGKJ2	0.0133	0.0093
BD57-0399	BA.5 BTI	F3	0.0101	0.703	0.0566	0.0616	0.0764	0.238	0.488	IGHV2-5	IGHJ4	IGKV1-39	IGKJ4	0.0297	0.0502
BD57-0400	BA.5 BTI	E3	>10	>10	>10	>10	>10	>10	>10	IGHV1-46	IGHJ4	IGKV1-27	IGKJ1	0.0572	0.0308
BD57-0401	BA.5 BTI	E3	>10	>10	>10	>10	>10	>10	>10	IGHV4-39	IGHJ4	IGLV2-8	IGLJ2	0.0559	0.0122
BD57-0402	BA.5 BTI	C/D1	0.00413	0.370	0.348	3.12	>10	>10	>10	IGHV1-46	IGHJ4	IGLV7-43	IGLJ3	0.0637	0.0613
BD57-0403	BA.5 BTI	F1	>10	>10	>10	>10	>10	>10	>10	IGHV3-13	IGHJ4	IGKV1-39	IGKJ4	0.0463	0.0369
BD57-0405	BA.5 BTI	E1/E2.1	0.111	0.208	0.262	0.181	>10	>10	>10	IGHV7-4-1	IGHJ5	IGLV3-21	IGLJ1	0.0693	0.0369
BD57-0407	BA.5 BTI	E2.2	1.54	0.216	0.201	0.523	>10	>10	>10	IGHV1-69	IGHJ4	IGLV1-40	IGLJ2	0.067	0.0386
BD57-0408	BA.5 BTI	E1/E2.1	0.0445	0.161	0.172	0.191	>10	3.42	1.65	IGHV3-9	IGHJ6	IGLV2-14	IGLJ2	0.0476	0.0211
BD57-0409	BA.5 BTI	A1	0.00158	0.0463	0.0515	0.00444	0.0246	>10	>10	IGHV3-30	IGHJ6	IGKV1-13	IGKJ1	0.04	0.0502
BD57-0410	BA.5 BTI	E2.2	>10	9.64	7.18	7.56	>10	>10	>10	IGHV3-15	IGHJ3	IGKV3-20	IGKJ1	0.0519	0.028
BD57-0412	BA.5 BTI	D2	<0.0005	2.85	0.00482	0.00399	>10	>10	>10	IGHV2-5	IGHJ4	IGLV2-14	IGLJ3	0.0223	0.0332
BD57-0413	BA.5 BTI	F1	>10	>10	>10	>10	>10	>10	>10	IGHV3-7	IGHJ4	IGLV6-57	IGLJ3	0.0111	0.009
BD57-0414	BA.5 BTI	A2	>10	>10	>10	>10	>10	>10	>10	IGHV3-7	IGHJ5	IGKV3-11	IGKJ5	0.0079	0.0031
BD57-0415	BA.5 BTI	A1	>10	0.350	0.0142	0.0243	2.03	>10	>10	IGHV3-66	IGHJ4	IGKV1-33	IGKJ2	0.0108	0.0031
BD57-0416	BA.5 BTI	F3	>10	>10	0.0471	0.0426	0.110	0.154	0.110	IGHV2-5	IGHJ4	IGKV3D-15	IGKJ3	0.0133	0.0093
BD57-0417	BA.5 BTI	D2	1.00	>10	0.0467	0.0164	>10	>10	>10	IGHV2-70	IGHJ6	IGLV1-44	IGLJ3	0.0109	0.0151
BD57-0418	BA.5 BTI	F3	>10	>10	>10	1.00	2.03	0.411	0.187	IGHV2-5	IGHJ4	IGKV3-15	IGKJ5	0.0106	0
BD57-0419	BA.5 BTI	F3	>10	>10	0.414	0.134	>10	1.44	0.629	IGHV2-5	IGHJ5	IGKV3-15	IGKJ5	0.0107	0.0154
BD57-0420	BA.5 BTI	A2	>10	>10	>10	>10	>10	>10	>10	IGHV3-53	IGHJ6	IGLV1-40	IGLJ2	0.0217	0.006
BD57-0421	BA.5 BTI	F1	>10	>10	1.86	1.10	1.96	1.46	2.77	IGHV3-66	IGHJ4	IGLV6-57	IGLJ3	0.0083	0.003
BD57-0422	BA.5 BTI	B	>10	>10	>10	0.0735	0.126	>10	>10	IGHV3-7	IGHJ4	IGLV9-49	IGLJ2	0.008	0.0086
BD57-0423	BA.5 BTI	A2	>10	3.53	0.829	0.0290	0.256	0.346	0.703	IGHV3-30	IGHJ6	IGLV1-51	IGLJ3	0.0133	0.0121
BD57-0424	BA.5 BTI	F3	>10	>10	>10	>10	>10	>10	>10	IGHV2-5	IGHJ4	IGKV3-15	IGKJ4	0.0189	0.0094
BD57-0425	BA.5 BTI	C/D1	>10	1.25	0.459	0.0207	0.0240	>10	>10	IGHV3-13	IGHJ4	IGKV3-20	IGKJ1	0.0082	0.0092
BD57-0426	BA.5 BTI	F1	>10	>10	2.15	2.10	2.03	0.284	0.528	IGHV3-66	IGHJ3	IGLV6-57	IGLJ3	0.0053	0.0091
BD57-0427	BA.5 BTI	F3	>10	>10	0.554	0.0637	3.15	0.850	1.46	IGHV2-5	IGHJ4	IGKV3-15	IGKJ2	0.0188	0.0063
BD57-0428	BA.5 BTI	F3	>10	0.0135	0.0235	0.0114	0.0502	0.0583	0.0523	IGHV3-33	IGHJ6	IGKV1-27	IGKJ4	0.0215	0.0093
BD57-0429	BA.5 BTI	F3	>10	>10	0.268	0.135	0.907	0.428	0.550	IGHV2-5	IGHJ5	IGKV3-11	IGKJ4	0.0161	0.0063
BD57-0430	BA.5 BTI	A1	>10	>10	2.76	0.412	0.429	1.02	0.606	IGHV3-33	IGHJ6	IGLV1-44	IGLJ1	0.0219	0.006
BD57-0431	BA.5 BTI	F3	>10	>10	0.0737	0.0382	2.84	1.02	1.36	IGHV2-5	IGHJ1	IGKV3-15	IGKJ5	0.0214	0.0092
BD57-0432	BA.5 BTI	B	>10	>10	>10	0.0168	0.0418	>10	>10	IGHV3-13	IGHJ2	IGLV9-49	IGLJ1	0.0116	0.0172
BD57-0434	BA.5 BTI	D3	>10	2.54	0.144	0.100	>10	1.75	3.09	IGHV5-51	IGHJ4	IGKV1-39	IGKJ2	0.0057	0.0031
BD57-0435	BA.5 BTI	A2	>10	>10	0.801	0.155	0.211	0.515	0.299	IGHV3-30	IGHJ6	IGKV2-30	IGKJ5	0.0238	0.0059
BD57-0437	BA.5 BTI	A1	>10	>10	0.0126	0.0215	0.281	1.03	0.862	IGHV2-5	IGHJ4	IGKV1-5	IGKJ2	0.0214	0.0186
BD57-0438	BA.5 BTI	A2	>10	>10	0.410	0.0222	0.0982	0.0810	0.124	IGHV3-33	IGHJ6	IGKV2-28	IGKJ3	0.0148	0.006
BD57-0439	BA.5 BTI	F3	>10	>10	>10	0.474	>10	>10	>10	IGHV2-5	IGHJ4	IGKV3-15	IGKJ4	0.0214	0.0093
BD57-0440	BA.5 BTI	D3	>10	0.00262	0.0285	0.0246	0.125	0.0375	0.164	IGHV2-70	IGHJ6	IGLV3-25	IGLJ2	0.0109	0.0122
BD57-0441	BA.5 BTI	C/D1	>10	>10	>10	1.43	4.37	>10	>10	IGHV3-15	IGHJ6	IGLV2-11	IGLJ2	0.0051	0.012
BD57-0442	BA.5 BTI	F1	>10	>10	>10	>10	>10	>10	>10	IGHV3-48	IGHJ4	IGLV6-57	IGLJ1	0.008	0.009
BD57-0443	BA.5 BTI	F3	>10	>10	0.271	0.579	>10	>10	>10	IGHV5-51	IGHJ4	IGKV1-39	IGKJ2	0.0218	0.0124
BD57-0444	BA.5 BTI	A1	>10	0.0264	0.00284	0.00339	0.00623	0.0135	0.0133	IGHV3-20	IGHJ6	IGLV1-40	IGLJ3	0.0188	0.015
BD57-0445	BA.5 BTI	F3	>10	>10	>10	>10	>10	>10	>10	IGHV2-5	IGHJ5	IGKV3-15	IGKJ5	0.0241	0.0125
BD57-0447	BA.5 BTI	F3	>10	>10	0.00860	0.00573	0.00892	0.0238	0.0166	IGHV5-51	IGHJ4	IGKV4-1	IGKJ2	0.0254	0.0088
BD57-0448	BA.5 BTI	F3	>10	>10	1.32	0.0927	3.71	2.29	4.98	IGHV2-5	IGHJ5	IGKV3-15	IGKJ1	0.0241	0.0155
BD57-0449	BA.5 BTI	C/D1	>10	>10	>10	1.46	>10	>10	>10	IGHV3-23	IGHJ2	IGKV1-5	IGKJ2	0.104	0.102
BD57-0450	BA.5 BTI	F3	>10	>10	1.26	0.548	>10	>10	>10	IGHV2-5	IGHJ4	IGKV3-15	IGKJ1	0.0213	0.0126
BD57-0451	BA.5 BTI	F3	>10	0.195	0.0467	0.0219	0.313	0.0585	0.0827	IGHV2-5	IGHJ4	IGKV3-15	IGKJ3	0.0239	0.0093
BD57-0452	BA.5 BTI	A2	>10	>10	0.0555	0.00583	0.226	0.204	0.150	IGHV3-7	IGHJ5	IGKV1-39	IGKJ3	0.0163	0.0061
BD57-0453	BA.5 BTI	E2.2	>10	>10	>10	0.00203	2.17	>10	>10	IGHV4-39	IGHJ5	IGLV1-51	IGLJ3	0.0258	0.0121
BD57-0454	BA.5 BTI	C/D1	>10	>10	>10	>10	>10	>10	>10	IGHV5-51	IGHJ4	IGLV1-51	IGLJ3	0.0272	0.003
BD57-0455	BA.5 BTI	E1/E2.1	>10	>10	>10	0.00623	>10	>10	>10	IGHV3-15	IGHJ5	IGKV1-39	IGKJ2	0.0188	0.0185
BD57-0456	BA.5 BTI	B	>10	>10	>10	0.0217	0.0196	>10	>10	IGHV3-13	IGHJ3	IGLV9-49	IGLJ1	0.0173	0.0201
BD57-0457	BA.5 BTI	A2	>10	>10	>10	0.198	1.88	>10	>10	IGHV3-49	IGHJ6	IGLV1-44	IGLJ2	0.0251	0.0181
BD57-0458	BA.5 BTI	D2	>10	1.60	0.00117	0.00207	>10	>10	>10	IGHV2-5	IGHJ4	IGLV1-36	IGLJ3	0.0085	0.0242
BD57-0459	BA.5 BTI	A2	>10	>10	1.87	0.0307	0.0277	0.0226	0.0198	IGHV3-30	IGHJ6	IGLV1-51	IGLJ1	0.021	0.0091
BD57-0460	BA.5 BTI	F3	>10	>10	>10	>10	>10	>10	>10	IGHV2-5	IGHJ4	IGKV3-15	IGKJ2	0.0188	0.0124
BD57-0461	BA.5 BTI	D2	>10	2.01	0.0171	0.00870	>10	>10	>10	IGHV2-5	IGHJ4	IGLV1-44	IGLJ3	0.0083	0.006
BD57-0463	BA.5 BTI	F3	>10	>10	>10	0.911	4.12	0.537	0.246	IGHV2-5	IGHJ2	IGKV3-15	IGKJ2	0.0053	0.0186
BD57-0464	BA.5 BTI	F1	>10	>10	0.845	0.680	1.02	0.778	0.942	IGHV4-38-2	IGHJ3	IGKV3-15	IGKJ4	0.0275	0.0093
BD57-0465	BA.5 BTI	F3	>10	>10	0.0732	0.0720	0.223	1.42	1.98	IGHV1-46	IGHJ6	IGKV1-33	IGKJ4	0.0184	0.0156
BD57-0466	BA.5 BTI	C/D1	>10	>10	>10	0.00369	0.00382	>10	>10	IGHV3-11	IGHJ6	IGKV3-20	IGKJ5	0.0161	0.0215
BD57-0467	BA.5 BTI	C/D1	>10	>10	0.420	0.00178	0.00180	>10	>10	IGHV1-24	IGHJ4	IGLV3-1	IGLJ2	0.0222	0.0282
BD57-0468	BA.5 BTI	A2	>10	0.0231	0.0437	0.0207	0.0232	0.113	0.0826	IGHV3-33	IGHJ6	IGLV1-44	IGLJ1	0.024	0.0121
BD57-0532	BA.5 BTI	E3	>10	>10	>10	>10	>10	>10	>10	IGHV4-39	IGHJ4	IGKV2-30	IGKJ1	0.0307	0.0059
BD57-0533	BA.5 BTI	F1	>10	>10	>10	>10	>10	>10	>10	IGHV3-13	IGHJ2	IGKV1-39	IGKJ5	0.0381	0.0525
BD57-0538	BA.5 BTI	F1	>10	>10	>10	>10	>10	>10	>10	IGHV3-21	IGHJ4	IGKV1-39	IGKJ1	0.0545	0.0462
BD57-0539	BA.5 BTI	F1	0.763	--	--	1.59	>10	>10	>10	IGHV3-30	IGHJ5	IGKV1-39	IGKJ1	0.0697	0.04
BD57-0540	BA.5 BTI	F1	>10	>10	>10	>10	>10	>10	>10	IGHV3-30	IGHJ4	IGKV1-39	IGKJ4	0.0669	0.04
BD57-0541	BA.5 BTI	F1	>10	>10	>10	>10	>10	>10	>10	IGHV3-30	IGHJ4	IGKV1-39	IGKJ4	0.0641	0.0462
BD57-0542	BA.5 BTI	F1	>10	>10	>10	>10	>10	>10	>10	IGHV3-13	IGHJ6	IGKV1-39	IGKJ1	0.0523	0.0338
BD57-0543	BA.5 BTI	F1	0.913	--	--	>10	>10	>10	>10	IGHV3-30-3	IGHJ4	IGKV1-39	IGKJ5	0.0459	0.0523
BD57-0547	BA.5 BTI	F1	>10	>10	>10	>10	>10	>10	>10	IGHV3-33	IGHJ4	IGKV1-39	IGKJ1	0.0249	0.0215
BD57-0548	BA.5 BTI	F1	>10	>10	>10	>10	>10	>10	>10	IGHV3-23	IGHJ4	IGKV1-39	IGKJ1	0.0518	0.0404
BD57-0549	BA.5 BTI	E2.2	3.32	--	--	2.01	>10	>10	>10	IGHV1-46	IGHJ4	IGKV1-33	IGKJ2	0.0529	0.0282
BD57-0551	BA.5 BTI	F1	>10	--	--	1.01	1.17	>10	>10	IGHV4-61	IGHJ4	IGKV1-39	IGKJ3	0.0622	0.0561
BD57-0552	BA.5 BTI	A1	0.0190	--	--	0.0881	>10	>10	>10	IGHV3-66	IGHJ4	IGKV1-33	IGKJ3	0.0732	0.0369
BD57-0553	BA.5 BTI	A1	0.0196	--	--	0.00704	0.0133	0.0129	0.0245	IGHV3-66	IGHJ6	IGKV1-33	IGKJ2	0.0476	0.028
BD57-0554	BA.5 BTI	A1	0.00875	--	--	0.00700	0.00928	0.0129	0.00788	IGHV3-53	IGHJ6	IGKV1-33	IGKJ3	0.0532	0.0248
BD57-0555	BA.5 BTI	A1	0.0109	--	--	0.00948	0.0150	0.00994	0.00751	IGHV3-66	IGHJ4	IGKV1-33	IGKJ4	0.0625	0.0404
BD57-0556	BA.5 BTI	A1	0.0172	--	--	0.0224	>10	>10	>10	IGHV3-53	IGHJ4	IGKV1-33	IGKJ1	0.0312	0.0497
BD57-0557	BA.5 BTI	A1	0.0352	--	--	0.0340	>10	>10	>10	IGHV3-53	IGHJ4	IGKV1-33	IGKJ4	0.0312	0.0124
BD57-0558	BA.5 BTI	A1	0.00992	--	--	0.00794	0.560	>10	>10	IGHV3-66	IGHJ4	IGKV1-33	IGKJ4	0.0455	0.028
BD57-0562	BA.5 BTI	A1	0.0381	--	--	0.0850	>10	>10	>10	IGHV3-66	IGHJ4	IGKV1-33	IGKJ4	0.0379	0.0124
BD57-0563	BA.5 BTI	F1	>10	>10	>10	>10	>10	>10	>10	IGHV3-13	IGHJ5	IGKV1-39	IGKJ1	0.0381	0.0431
BD57-0564	BA.5 BTI	C/D1	>10	--	--	1.38	1.07	>10	>10	IGHV4-59	IGHJ6	IGKV1-16	IGKJ4	0.0379	0.0435
BD57-0565	BA.5 BTI	C/D1	>10	--	--	0.0895	0.230	>10	>10	IGHV4-59	IGHJ6	IGKV1-16	IGKJ4	0.0352	0.0219
BD57-0567	BA.5 BTI	C/D1	>10	--	--	0.424	0.777	>10	>10	IGHV4-59	IGHJ6	IGKV1-16	IGKJ4	0.0301	0.028
BD57-0572	BA.5 BTI	F1	>10	>10	>10	>10	>10	>10	>10	IGHV3-13	IGHJ4	IGKV1-39	IGKJ1	0.0582	0.0599
BD57-0573	BA.5 BTI	F1	2.39	--	--	>10	>10	>10	>10	IGHV3-30-3	IGHJ4	IGKV1-39	IGKJ1	0.0349	0.0369
BD57-0575	BA.5 BTI	D3	>10	--	--	0.560	>10	>10	>10	IGHV2-70	IGHJ4	IGKV1-39	IGKJ1	0.0055	0.0155
BD57-0576	BA.5 BTI	F1	1.36	--	--	>10	>10	>10	>10	IGHV3-30	IGHJ4	IGKV1-39	IGKJ4	0.0332	0.0277
BD57-0577	BA.5 BTI	F1	>10	>10	>10	>10	>10	>10	>10	IGHV3-13	IGHJ2	IGKV1-39	IGKJ2	0.0405	0.0123
BD57-0578	BA.5 BTI	F1	>10	>10	>10	>10	>10	>10	>10	IGHV3-13	IGHJ5	IGKV1-39	IGKJ4	0.0381	0.0215
BD57-0580	BA.5 BTI	A1	0.0176	--	--	>10	>10	>10	>10	IGHV3-30-3	IGHJ4	IGKV1-39	IGKJ1	0.0598	0.0311
BD57-0581	BA.5 BTI	F1	>10	>10	>10	>10	>10	>10	>10	IGHV3-13	IGHJ4	IGKV1-39	IGKJ2	0.0409	0.0308
BD57-0583	BA.5 BTI	A1	>10	--	--	0.00996	0.0341	1.85	1.44	IGHV1-69	IGHJ3	IGKV1-39	IGKJ1	0.0152	0.0093
BD57-0585	BA.5 BTI	F1	>10	>10	>10	>10	>10	>10	>10	IGHV3-30	IGHJ4	IGKV1-39	IGKJ3	0.0443	0.0123
BD57-0586	BA.5 BTI	E1/E2.1	>10	--	--	0.394	>10	>10	>10	IGHV3-15	IGHJ5	IGKV1-39	IGKJ2	0	0
BD57-0587	BA.5 BTI	F1	>10	>10	>10	>10	>10	>10	>10	IGHV3-33	IGHJ5	IGKV1-39	IGKJ1	0.0305	0.0123
BD57-0590	BA.5 BTI	D4	>10	--	--	0.100	2.45	>10	>10	IGHV1-46	IGHJ3	IGKV1-39	IGKJ1	0.0282	0.0154
BD57-0591	BA.5 BTI	F1	>10	>10	>10	>10	>10	>10	>10	IGHV1-2	IGHJ5	IGKV1-39	IGKJ1	0.0302	0.04
BD57-0593	BA.5 BTI	F1	>10	>10	>10	>10	>10	>10	>10	IGHV3-13	IGHJ4	IGKV1-39	IGKJ4	0.0436	0.0308
BD57-0594	BA.5 BTI	F1	>10	>10	>10	>10	>10	>10	>10	IGHV3-30	IGHJ4	IGKV1-39	IGKJ4	0.0693	0.059
BD57-0597	BA.5 BTI	F1	>10	>10	>10	>10	>10	>10	>10	IGHV3-30	IGHJ4	IGKV1-39	IGKJ4	0.0305	0.0338
BD57-0606	BA.5 BTI	E2.2	0.757	--	--	0.999	3.32	0.888	0.839	IGHV2-5	IGHJ4	IGKV1-12	IGKJ3	0.0268	0.0155
BD57-0608	BA.5 BTI	C/D1	>10	>10	>10	>10	>10	>10	>10	IGHV1-2	IGHJ4	IGKV1-5	IGKJ2	0.0357	0.0277
BD57-0609	BA.5 BTI	E3	2.93	--	--	2.98	>10	>10	>10	IGHV1-46	IGHJ4	IGKV1-5	IGKJ1	0.0708	0.0466
BD57-0610	BA.5 BTI	E1/E2.1	0.00844	--	--	0.00251	>10	>10	>10	IGHV1-69	IGHJ3	IGKV1-5	IGKJ4	0.104	0.0462
BD57-0611	BA.5 BTI	E2.2	>10	>10	>10	>10	>10	>10	>10	IGHV3-48	IGHJ4	IGKV1-5	IGKJ1	0.0443	0.028
BD57-0613	BA.5 BTI	A2	>10	--	--	0.0587	0.147	0.244	0.438	IGHV3-30	IGHJ6	IGKV1-5	IGKJ3	0.0157	0.0092
BD57-0618	BA.5 BTI	F1	2.14	--	--	2.21	--	>10	>10	IGHV3-33	IGHJ5	IGKV1-39	IGKJ1	0.0471	0.04
BD57-0623	BA.5 BTI	E3	1.47	--	--	1.78	>10	>10	>10	IGHV3-66	IGHJ6	IGKV4-1	IGKJ4	0.056	0.0204
BD57-0624	BA.5 BTI	C/D1	>10	--	--	0.654	0.696	>10	>10	IGHV1-2	IGHJ6	IGKV4-1	IGKJ4	0.0181	0.0206
BD57-0628	BA.5 BTI	F1	1.72	--	--	2.46	>10	>10	>10	IGHV3-30	IGHJ5	IGKV4-1	IGKJ2	0.0426	0.0466
BD57-0629	BA.5 BTI	A2	>10	--	--	0.0747	0.396	>10	>10	IGHV3-30	IGHJ4	IGKV4-1	IGKJ1	0.0241	0.0058
BD57-0640	BA.5 BTI	E3	0.704	--	--	0.806	2.85	1.39	0.563	IGHV4-34	IGHJ3	IGKV4-1	IGKJ3	0.0297	0.0265
BD57-0645	BA.5 BTI	A2	>10	--	--	0.0269	0.0305	0.0371	0.0165	IGHV3-30	IGHJ6	IGKV4-1	IGKJ4	0.0157	0.003
BD57-0646	BA.5 BTI	A2	>10	--	--	1.94	>10	>10	>10	IGHV3-33	IGHJ6	IGKV4-1	IGKJ1	0	0
BD57-0647	BA.5 BTI	A1	>10	--	--	0.00806	0.0214	0.0193	0.0164	IGHV3-33	IGHJ4	IGKV4-1	IGKJ5	0.0236	0.0148
BD57-0658	BA.5 BTI	F3	>10	--	--	0.00148	0.00684	0.00245	0.00404	IGHV3-30	IGHJ5	IGKV2-28	IGKJ3	0.0251	0.0118
BD57-0660	BA.5 BTI	A2	>10	--	--	2.23	>10	>10	>10	IGHV3-33	IGHJ6	IGKV2-28	IGKJ1	0.0177	0
BD57-0664	BA.5 BTI	A2	>10	--	--	0.313	>10	>10	>10	IGHV3-33	IGHJ6	IGKV2-28	IGKJ2	0.0132	0.0148
BD57-0668	BA.5 BTI	D4	>10	--	--	0.0139	0.0240	0.0499	0.0464	IGHV5-51	IGHJ4	IGKV2D-29	IGKJ3	0.008	0.009
BD57-0669	BA.5 BTI	E3	>10	--	--	1.80	>10	>10	>10	IGHV4-59	IGHJ4	IGKV2D-29	IGKJ3	0.0459	0.0412
BD57-0679	BA.5 BTI	F3	>10	--	--	0.0185	0.0362	0.0272	0.0207	IGHV1-18	IGHJ4	IGKV2-30	IGKJ1	0.0247	0.003
BD57-0684	BA.5 BTI	A1	0.00854	--	--	0.164	>10	0.0951	0.0769	IGHV3-9	IGHJ6	IGKV3-11	IGKJ3	0.0217	0.0186
BD57-0685	BA.5 BTI	E3	>10	>10	>10	>10	>10	>10	>10	IGHV4-31	IGHJ4	IGKV3-11	IGKJ4	0.0714	0.0277
BD57-0687	BA.5 BTI	A1	0.00515	--	--	0.0296	0.259	0.0997	0.0403	IGHV3-21	IGHJ5	IGKV3-11	IGKJ5	0.0559	0.0342
BD57-0689	BA.5 BTI	A1	>10	>10	>10	>10	>10	>10	>10	IGHV3-11	IGHJ4	IGKV3-11	IGKJ1	0.008	0.0031
BD57-0690	BA.5 BTI	A1	>10	>10	>10	>10	>10	>10	>10	IGHV2-5	IGHJ5	IGKV3-11	IGKJ1	0.0103	0.0093
BD57-0691	BA.5 BTI	A2	>10	--	--	0.0450	0.229	0.231	0.124	IGHV2-5	IGHJ5	IGKV3-11	IGKJ4	0.0206	0.0124
BD57-0693	BA.5 BTI	A2	>10	--	--	0.0160	0.0390	0.0623	0.0396	IGHV3-30	IGHJ6	IGKV3-11	IGKJ2	0.0182	0.0215
BD57-0695	BA.5 BTI	E3	>10	>10	>10	>10	>10	>10	>10	IGHV2-5	IGHJ4	IGKV3-15	IGKJ2	0.0181	0.028
BD57-0700	BA.5 BTI	A1	0.00685	--	--	0.0224	0.0527	0.121	0.0509	IGHV3-53	IGHJ6	IGKV3-20	IGKJ1	0.0282	0.0342
BD57-0702	BA.5 BTI	A1	0.00796	--	--	0.00776	0.0108	0.00703	0.00670	IGHV3-66	IGHJ6	IGKV3-20	IGKJ2	0.0726	0.0457
BD57-0704	BA.5 BTI	E2.2	>10	>10	>10	>10	>10	>10	>10	IGHV3-74	IGHJ3	IGKV3-20	IGKJ1	0.0189	0.0217
BD57-0706	BA.5 BTI	E3	>10	>10	>10	>10	>10	>10	>10	IGHV4-59	IGHJ4	IGKV3-20	IGKJ4	0.0398	0.0185
BD57-0711	BA.5 BTI	E2.2	0.744	--	--	0.614	>10	>10	>10	IGHV4-39	IGHJ4	IGKV3-15	IGKJ5	0.062	0.0125
BD57-0721	BA.5 BTI	D2	>10	--	--	0.0845	>10	>10	>10	IGHV2-5	IGHJ2	IGKV3-15	IGKJ3	0.022	0.0093
BD57-0723	BA.5 BTI	F3	>10	--	--	0.618	0.669	0.133	0.0913	IGHV2-5	IGHJ6	IGKV3-15	IGKJ1	0.008	0.0155
BD57-0724	BA.5 BTI	B	>10	>10	>10	>10	>10	>10	>10	IGHV1-24	IGHJ5	IGKV3-15	IGKJ1	0	0.0031
BD57-0728	BA.5 BTI	A2	>10	>10	>10	>10	>10	>10	>10	IGHV3-23	IGHJ6	IGKV3D-15	IGKJ2	0.121	0.0738
BD57-0741	BA.5 BTI	F1	>10	>10	>10	>10	>10	>10	>10	IGHV4-30-2	IGHJ5	IGLV6-57	IGLJ2	0.0604	0.0269
BD57-0742	BA.5 BTI	F1	>10	>10	>10	>10	>10	>10	>10	IGHV4-4	IGHJ5	IGLV6-57	IGLJ2	0.049	0.0181
BD57-0743	BA.5 BTI	F1	>10	>10	>10	>10	>10	>10	>10	IGHV4-61	IGHJ5	IGLV6-57	IGLJ2	0.0776	0.0604
BD57-0744	BA.5 BTI	F1	>10	>10	>10	>10	>10	>10	>10	IGHV4-61	IGHJ5	IGLV6-57	IGLJ2	0.0803	0.0423
BD57-0745	BA.5 BTI	F1	>10	>10	>10	>10	>10	>10	>10	IGHV4-61	IGHJ5	IGLV6-57	IGLJ3	0.0649	0.0514
BD57-0746	BA.5 BTI	F1	>10	>10	>10	>10	>10	>10	>10	IGHV4-61	IGHJ4	IGLV6-57	IGLJ2	0.0447	0.0091
BD57-0747	BA.5 BTI	F1	>10	>10	>10	>10	>10	>10	>10	IGHV4-61	IGHJ5	IGLV6-57	IGLJ2	0.0776	0.0332
BD57-0748	BA.5 BTI	F1	>10	>10	>10	>10	>10	>10	>10	IGHV4-61	IGHJ5	IGLV6-57	IGLJ2	0.0471	0.0242
BD57-0749	BA.5 BTI	F1	0.650	>10	>10	>10	>10	>10	>10	IGHV4-61	IGHJ6	IGLV6-57	IGLJ1	0.0111	0.0059
BD57-0750	BA.5 BTI	F1	>10	>10	>10	>10	>10	>10	>10	IGHV4-39	IGHJ4	IGLV6-57	IGLJ3	0.0108	0
BD57-0751	BA.5 BTI	F1	>10	>10	>10	>10	>10	>10	>10	IGHV4-4	IGHJ5	IGLV6-57	IGLJ2	0.0366	0.0151
BD57-0754	BA.5 BTI	F3	>10	--	--	0.0401	0.0663	>10	>10	IGHV3-30	IGHJ3	IGLV6-57	IGLJ3	0.0028	0.006
BD57-0758	BA.5 BTI	F1	2.08	--	--	3.39	>10	>10	>10	IGHV1-18	IGHJ4	IGLV6-57	IGLJ3	0.111	0.0514
BD57-0762	BA.5 BTI	C/D1	0.0697	--	--	2.52	>10	>10	>10	IGHV1-46	IGHJ5	IGLV7-46	IGLJ1	0.0643	0.0272
BD57-0763	BA.5 BTI	A2	>10	--	--	0.985	0.450	0.469	0.391	IGHV3-33	IGHJ6	IGLV9-49	IGLJ1	0.0355	0.0086
BD57-0766	BA.5 BTI	E1/E2.1	0.846	--	--	>10	>10	>10	>10	IGHV1-46	IGHJ5	IGLV7-46	IGLJ1	0.0697	0.0514
BD57-0772	BA.5 BTI	D2	0.000823	--	--	<0.0005	>10	>10	>10	IGHV2-5	IGHJ4	IGLV2-14	IGLJ3	0.0726	0.0665
BD57-0777	BA.5 BTI	E2.2	0.955	--	--	0.740	>10	>10	>10	IGHV1-18	IGHJ4	IGLV2-14	IGLJ2	0.0582	0.0359
BD57-0784	BA.5 BTI	E3	>10	>10	>10	>10	>10	>10	>10	IGHV4-30-4	IGHJ4	IGLV2-23	IGLJ3	0.0612	0.0646
BD57-0785	BA.5 BTI	E3	>10	>10	>10	>10	>10	>10	>10	IGHV3-48	IGHJ4	IGLV2-23	IGLJ3	0.0188	0.003
BD57-0787	BA.5 BTI	E2.2	>10	>10	>10	>10	>10	>10	>10	IGHV2-5	IGHJ4	IGLV2-14	IGLJ3	0.0203	0.0299
BD57-0791	BA.5 BTI	E3	>10	>10	>10	>10	>10	>10	>10	IGHV4-39	IGHJ4	IGLV2-8	IGLJ2	0.0463	0.0151
BD57-0792	BA.5 BTI	E3	>10	>10	>10	>10	>10	>10	>10	IGHV4-39	IGHJ4	IGLV2-8	IGLJ2	0.0518	0.0181
BD57-0793	BA.5 BTI	E3	>10	>10	>10	>10	>10	>10	>10	IGHV4-39	IGHJ3	IGLV2-8	IGLJ2	0.067	0.0367
BD57-0796	BA.5 BTI	F3	>10	--	--	0.00649	0.0445	0.0178	0.0296	IGHV7-4-1	IGHJ5	IGLV2-11	IGLJ1	0.0165	0.006
BD57-0799	BA.5 BTI	E3	>10	>10	>10	>10	>10	>10	>10	IGHV4-30-4	IGHJ4	IGLV2-11	IGLJ2	0.0274	0.0369
BD57-0800	BA.5 BTI	E3	>10	>10	>10	>10	>10	>10	>10	IGHV3-48	IGHJ4	IGLV2-11	IGLJ1	0.0412	0.0366
BD57-0801	BA.5 BTI	E3	>10	>10	>10	>10	>10	>10	>10	IGHV4-30-4	IGHJ4	IGLV2-11	IGLJ2	0.0436	0.0277
BD57-0802	BA.5 BTI	E3	>10	>10	>10	>10	>10	>10	>10	IGHV4-30-4	IGHJ4	IGLV2-11	IGLJ3	0.0191	0.0246
BD57-0803	BA.5 BTI	E3	>10	>10	>10	>10	>10	>10	>10	IGHV4-31	IGHJ4	IGLV2-11	IGLJ2	0.0708	0.0492
BD57-0805	BA.5 BTI	A2	>10	--	--	0.00722	0.0253	0.0112	0.0126	IGHV3-30	IGHJ6	IGLV1-51	IGLJ3	0.0234	0.0329
BD57-0807	BA.5 BTI	E2.2	1.38	--	--	0.712	2.19	1.23	2.25	IGHV1-69	IGHJ3	IGLV1-44	IGLJ2	0.0549	0.0638
BD57-0808	BA.5 BTI	E3	>10	--	--	4.17	>10	3.36	2.47	IGHV3-48	IGHJ4	IGLV1-44	IGLJ1	0.0554	0.0302
BD57-0812	BA.5 BTI	C/D1	>10	--	--	0.00469	0.00482	0.0465	0.0371	IGHV5-51	IGHJ6	IGLV1-47	IGLJ3	0.0242	0.0091
BD57-0815	BA.5 BTI	A2	>10	--	--	0.141	0.422	1.58	1.67	IGHV3-33	IGHJ6	IGLV1-44	IGLJ1	0.019	0.003
BD57-0820	BA.5 BTI	F1	0.974	--	--	3.43	>10	1.41	0.947	IGHV1-69	IGHJ6	IGLV1-47	IGLJ3	0.0433	0.0246
BD57-0822	BA.5 BTI	A2	>10	--	--	0.351	1.19	0.506	0.342	IGHV4-39	IGHJ4	IGLV1-40	IGLJ1	0.0516	0.021
BD57-0829	BA.5 BTI	C/D1	>10	--	--	0.0165	0.00392	>10	>10	IGHV5-51	IGHJ4	IGLV1-51	IGLJ3	0.0158	0
BD57-0830	BA.5 BTI	D2	>10	--	--	0.00575	0.0224	>10	>10	IGHV4-39	IGHJ4	IGLV1-51	IGLJ2	0.0295	0.006
BD57-0832	BA.5 BTI	D2	0.0407	--	--	0.101	>10	>10	>10	IGHV2-70	IGHJ4	IGLV1-51	IGLJ3	0.03	0.0181
BD57-0839	BA.5 BTI	E1/E2.1	0.00384	--	--	0.00288	>10	>10	>10	IGHV3-48	IGHJ6	IGLV1-40	IGLJ2	0.0608	0.0386
BD57-0841	BA.5 BTI	E3	>10	>10	>10	>10	>10	>10	>10	IGHV3-48	IGHJ4	IGLV1-44	IGLJ1	0.0211	0.0151
BD57-0842	BA.5 BTI	F3	>10	--	--	0.301	0.488	0.136	0.100	IGHV2-5	IGHJ1	IGLV7-43	IGLJ3	0.0074	0.0061
BD57-0850	BA.5 BTI	F1	>10	>10	>10	>10	>10	>10	>10	IGHV3-7	IGHJ4	IGLV3-25	IGLJ2	0.0643	0.0757
BD57-0852	BA.5 BTI	D4	>10	--	--	0.00422	0.0591	0.283	0.374	IGHV1-24	IGHJ4	IGLV3-19	IGLJ3	0.0137	0.0091
BD57-0858	BA.5 BTI	F1	>10	>10	>10	>10	>10	>10	>10	IGHV2-70	IGHJ6	IGLV3-25	IGLJ3	0.0187	0.0188
BD57-0860	BA.5 BTI	F1	>10	>10	>10	>10	>10	>10	>10	IGHV3-74	IGHJ6	IGLV3-25	IGLJ2	0.0529	0.0283
BD57-0861	BA.5 BTI	F1	1.68	>10	>10	>10	>10	>10	>10	IGHV2-5	IGHJ4	IGLV3-25	IGLJ3	0.0243	0.0252
BD57-0874	BA.5 BTI	E3	1.30	--	--	0.789	2.58	1.58	2.42	IGHV1-3	IGHJ6	IGLV3-25	IGLJ2	0.0388	0.0615
BD57-0875	BA.5 BTI	E2.2	>10	>10	>10	>10	>10	>10	>10	IGHV3-9	IGHJ3	IGLV3-21	IGLJ7	0.0272	0.0285
BD57-0876	BA.5 BTI	E1/E2.1	0.0278	--	--	0.0272	>10	>10	>10	IGHV4-39	IGHJ4	IGLV3-21	IGLJ1	0.0691	0.0335
BD57-0877	BA.5 BTI	E2.2	>10	>10	>10	>10	>10	>10	>10	IGHV1-46	IGHJ4	IGLV3-21	IGLJ2	0.0514	0.0427
BD57-0878	BA.5 BTI	E2.2	>10	>10	>10	>10	>10	>10	>10	IGHV3-9	IGHJ3	IGLV3-21	IGLJ1	0.0572	0.0426
BD57-0881	BA.5 BTI	E1/E2.1	0.0393	--	--	0.138	>10	>10	>10	IGHV3-9	IGHJ4	IGLV3-21	IGLJ2	0.034	0.0154
BD57-1131	BF.7 BTI	F3	>10	>10	>10	0.0949	0.153	0.0944	0.177	IGHV2-5	IGHJ2	IGKV3-15	IGKJ2	0.0133	0.0093
BD57-1132	BF.7 BTI	C/D1	>10	>10	>10	>10	>10	>10	>10	IGHV5-51	IGHJ4	IGKV1-9	IGKJ4	0.03	0.0125
BD57-1134	BF.7 BTI	A2	>10	0.00515	0.00507	0.00517	0.0113	0.00896	0.0114	IGHV3-33	IGHJ4	IGLV3-21	IGLJ2	0.0763	0.0554
BD57-1135	BF.7 BTI	D2	0.188	0.0321	0.00600	0.00436	2.89	0.176	>10	IGHV2-5	IGHJ4	IGLV1-47	IGLJ3	0.0137	0.0091
BD57-1136	BF.7 BTI	D4	>10	>10	0.0112	0.00437	0.0155	0.178	0.169	IGHV3-49	IGHJ6	IGKV1-33	IGKJ2	0.0127	0.0093
BD57-1137	BF.7 BTI	D4	>10	>10	>10	0.00528	0.384	1.51	0.192	IGHV4-4	IGHJ4	IGKV1-33	IGKJ2	0.0284	0
BD57-1138	BF.7 BTI	F3	>10	0.309	0.0444	0.0383	0.0509	0.0436	0.0585	IGHV2-5	IGHJ4	IGLV7-43	IGLJ3	0.016	0.0062
BD57-1139	BF.7 BTI	C/D1	>10	>10	>10	0.857	0.613	>10	>10	IGHV5-51	IGHJ4	IGKV1-39	IGKJ2	0.0803	0.0677
BD57-1140	BF.7 BTI	A2	>10	>10	>10	0.00119	0.0109	0.00977	0.0103	IGHV4-39	IGHJ4	IGLV1-40	IGLJ1	0.0241	0.0059
BD57-1141	BF.7 BTI	F3	>10	0.0606	0.0130	0.0183	0.250	0.244	0.395	IGHV2-5	IGHJ4	IGKV3-15	IGKJ4	0.0134	0.0215
BD57-1142	BF.7 BTI	A1	0.0480	0.00996	0.0181	0.0171	0.0683	0.0474	0.0939	IGHV3-66	IGHJ4	IGKV3-15	IGKJ3	0.0483	0.0123
BD57-1143	BF.7 BTI	F3	>10	>10	0.0397	0.0269	0.0676	0.0465	0.0345	IGHV3-30	IGHJ6	IGKV1-12	IGKJ4	0.0234	0.0124
BD57-1145	BF.7 BTI	C/D1	>10	0.00176	0.000828	0.000847	<0.0005	0.0440	>10	IGHV3-30	IGHJ4	IGKV1-5	IGKJ1	0.0369	0.0063
BD57-1146	BF.7 BTI	B	>10	0.796	0.300	0.00865	0.0234	1.21	>10	IGHV4-34	IGHJ4	IGLV1-44	IGLJ2	0.0739	0.0486
BD57-1149	BF.7 BTI	F3	>10	0.0439	0.00123	0.00167	0.0129	0.182	0.120	IGHV3-15	IGHJ2	IGLV1-51	IGLJ3	0.03	0.0242
BD57-1150	BF.7 BTI	F3	>10	>10	0.0754	0.0225	2.41	>10	>10	IGHV3-7	IGHJ4	IGLV1-40	IGLJ3	0.0357	0.024
BD57-1151	BF.7 BTI	A1	0.0572	0.000726	0.00117	0.00211	0.0195	0.0237	0.0269	IGHV3-53	IGHJ5	IGKV1-33	IGKJ2	0.0385	0.0404
BD57-1152	BF.7 BTI	C/D1	>10	>10	>10	0.00890	0.0105	>10	>10	IGHV1-69	IGHJ6	IGKV1-6	IGKJ1	0.0251	0.0031
BD57-1153	BF.7 BTI	C/D1	>10	>10	>10	3.40	>10	>10	>10	IGHV1-18	IGHJ6	IGKV3-15	IGKJ2	0.0543	0.0502
BD57-1154	BF.7 BTI	F1	>10	>10	>10	>10	>10	>10	>10	IGHV3-33	IGHJ4	IGKV1-39	IGKJ1	0.0332	0.0185
BD57-1155	BF.7 BTI	A1	0.0318	0.00146	0.00160	0.00462	0.0247	0.140	0.236	IGHV3-53	IGHJ5	IGKV1-33	IGKJ2	0.0192	0.0217
BD57-1156	BF.7 BTI	E2.2	>10	>10	>10	>10	>10	>10	>10	IGHV5-51	IGHJ3	IGKV3-20	IGKJ1	0.0381	0.0338
BD57-1157	BF.7 BTI	E2.2	>10	>10	>10	>10	>10	>10	>10	IGHV3-30	IGHJ6	IGKV1-33	IGKJ4	0.0275	0.0311
BD57-1158	BF.7 BTI	F1	>10	>10	>10	>10	>10	>10	>10	IGHV3-33	IGHJ4	IGKV1-39	IGKJ1	0.0595	0.0708
BD57-1159	BF.7 BTI	E3	>10	>10	>10	>10	>10	>10	>10	IGHV1-46	IGHJ4	IGLV2-14	IGLJ2	0.0381	0.0363
BD57-1161	BF.7 BTI	E3	>10	>10	>10	>10	>10	>10	>10	IGHV4-30-4	IGHJ3	IGLV2-23	IGLJ3	0.0449	0.0483
BD57-1162	BF.7 BTI	F1	>10	>10	>10	>10	>10	>10	>10	IGHV3-13	IGHJ4	IGKV1-39	IGKJ1	0.0559	0.0523
BD57-1163	BF.7 BTI	F1	>10	>10	>10	>10	>10	>10	>10	IGHV3-33	IGHJ5	IGKV1-39	IGKJ1	0.0405	0.0369
BD57-1165	BF.7 BTI	F1	>10	>10	>10	>10	>10	>10	>10	IGHV3-13	IGHJ3	IGKV1-39	IGKJ5	0.059	0.0615
BD57-1166	BF.7 BTI	E1/E2.1	0.0354	0.219	0.0711	0.168	0.989	0.0428	0.388	IGHV4-4	IGHJ6	IGKV1-39	IGKJ3	0.0397	0.0373
BD57-1167	BF.7 BTI	E2.2	0.837	0.189	0.514	0.557	1.82	1.07	1.52	IGHV3-23	IGHJ6	IGLV3-25	IGLJ3	0.0587	0.0423
BD57-1169	BF.7 BTI	A1	0.0102	0.00537	0.00426	0.00972	0.0103	0.0160	0.0195	IGHV3-66	IGHJ6	IGKV1-33	IGKJ2	0.0476	0.0031
BD57-1171	BF.7 BTI	E2.2	>10	>10	>10	>10	>10	>10	>10	IGHV5-10-1	IGHJ5	IGLV3-19	IGLJ3	0.0615	0.0422
BD57-1172	BF.7 BTI	E2.2	>10	>10	>10	>10	>10	>10	>10	IGHV3-30-3	IGHJ3	IGLV3-21	IGLJ3	0.0751	0.0457
BD57-1173	BF.7 BTI	F1	>10	>10	>10	>10	>10	>10	>10	IGHV3-13	IGHJ4	IGKV1-39	IGKJ1	0.0363	0.0308
BD57-1174	BF.7 BTI	F1	>10	>10	>10	>10	>10	>10	>10	IGHV3-13	IGHJ4	IGKV1-39	IGKJ1	0.0559	0.0462
BD57-1175	BF.7 BTI	F1	>10	>10	>10	>10	>10	>10	>10	IGHV3-64D	IGHJ4	IGKV1-39	IGKJ1	0.0463	0.0342
BD57-1176	BF.7 BTI	F1	>10	>10	>10	>10	>10	>10	>10	IGHV3-13	IGHJ5	IGKV1-39	IGKJ4	0.0272	0.0464
BD57-1177	BF.7 BTI	F1	>10	>10	>10	>10	>10	>10	>10	IGHV3-13	IGHJ2	IGKV1-39	IGKJ4	0.0632	0.0892
BD57-1178	BF.7 BTI	A1	0.00772	0.703	>10	0.197	2.37	0.0701	0.122	IGHV3-30-3	IGHJ4	IGKV1-39	IGKJ1	0.0455	0.028
BD57-1179	BF.7 BTI	F1	>10	>10	>10	>10	>10	>10	>10	IGHV6-1	IGHJ4	IGLV3-25	IGLJ2	0.0597	0.0502
BD57-1180	BF.7 BTI	E3	>10	>10	>10	>10	>10	>10	>10	IGHV1-46	IGHJ4	IGKV1-5	IGKJ4	0.0409	0.0342
BD57-1181	BF.7 BTI	E3	>10	>10	>10	>10	>10	>10	>10	IGHV1-46	IGHJ3	IGKV3-11	IGKJ2	0.049	0.0062
BD57-1182	BF.7 BTI	E2.2	>10	>10	>10	>10	>10	>10	>10	IGHV3-11	IGHJ1	IGLV3-21	IGLJ1	0.0222	0.0213
BD57-1183	BF.7 BTI	E2.2	>10	>10	>10	>10	>10	>10	>10	IGHV3-30	IGHJ4	IGLV3-21	IGLJ3	0.0509	0.0244
BD57-1184	BF.7 BTI	E2.2	>10	>10	>10	>10	>10	>10	>10	IGHV3-33	IGHJ4	IGLV2-14	IGLJ2	0.0429	0.024
BD57-1185	BF.7 BTI	E2.2	>10	>10	>10	>10	>10	>10	>10	IGHV1-18	IGHJ4	IGKV3-15	IGKJ1	0.0349	0.0335
BD57-1186	BF.7 BTI	E3	>10	>10	>10	>10	>10	>10	>10	IGHV1-46	IGHJ3	IGKV3-11	IGKJ2	0.0409	0.0061
BD57-1187	BF.7 BTI	E1/E2.1	0.00509	0.959	0.228	0.105	>10	>10	>10	IGHV3-15	IGHJ3	IGKV1-39	IGKJ4	0.0211	0.0094
BD57-1188	BF.7 BTI	E2.2	>10	>10	>10	>10	>10	>10	>10	IGHV3-30	IGHJ4	IGLV3-21	IGLJ3	0.0262	0.0215
BD57-1189	BF.7 BTI	E2.2	>10	>10	>10	>10	>10	>10	>10	IGHV3-30	IGHJ3	IGLV3-21	IGLJ2	0.0405	0.0475
BD57-1190	BF.7 BTI	D2	0.0154	>10	0.113	0.158	>10	>10	>10	IGHV2-70	IGHJ4	IGLV1-44	IGLJ3	0.0545	0.0515
BD57-1191	BF.7 BTI	A1	0.00600	0.00240	0.00348	0.00289	0.0411	0.0565	0.0744	IGHV3-53	IGHJ4	IGKV1-39	IGKJ3	0.0873	0.0585
BD57-1192	BF.7 BTI	E2.2	>10	>10	>10	>10	>10	>10	>10	IGHV3-30	IGHJ4	IGLV3-21	IGLJ2	0.0401	0.0381
BD57-1193	BF.7 BTI	F1	>10	>10	>10	>10	>10	>10	>10	IGHV3-13	IGHJ4	IGKV1-39	IGKJ4	0.0222	0.0277
BD57-1194	BF.7 BTI	F1	>10	>10	>10	>10	>10	>10	>10	IGHV6-1	IGHJ4	IGLV3-25	IGLJ2	0.0312	0.0313
BD57-1196	BF.7 BTI	D2	0.000708	>10	0.0571	0.0832	>10	>10	>10	IGHV2-5	IGHJ5	IGKV1-5	IGKJ3	0.0499	0.0157
BD57-1197	BF.7 BTI	F1	>10	>10	>10	>10	>10	>10	>10	IGHV3-30-3	IGHJ5	IGKV1-39	IGKJ1	0.0817	0.0554
BD57-1198	BF.7 BTI	F1	>10	>10	>10	>10	>10	>10	>10	IGHV3-13	IGHJ2	IGKV1-39	IGKJ3	0.0486	0.0526
BD57-1199	BF.7 BTI	E3	>10	>10	>10	>10	>10	>10	>10	IGHV3-30	IGHJ4	IGKV3-20	IGKJ3	0.0288	0.0215
BD57-1200	BF.7 BTI	E3	>10	>10	>10	>10	>10	>10	>10	IGHV2-5	IGHJ5	IGLV1-36	IGLJ3	0.0163	0.0151
BD57-1201	BF.7 BTI	E2.2	>10	>10	>10	>10	>10	>10	>10	IGHV4-31	IGHJ3	IGKV1-33	IGKJ2	0.0416	0.0305
BD57-1202	BF.7 BTI	F1	>10	>10	>10	>10	>10	>10	>10	IGHV3-30	IGHJ4	IGKV1-39	IGKJ1	0.0506	0.0372
BD57-1203	BF.7 BTI	E3	>10	>10	>10	>10	>10	>10	>10	IGHV3-30	IGHJ4	IGKV2-28	IGKJ5	0.0485	0.0119
BD57-1205	BF.7 BTI	F1	>10	>10	>10	>10	>10	>10	>10	IGHV3-64D	IGHJ4	IGKV1-39	IGKJ2	0.0549	0.0373
BD57-1206	BF.7 BTI	E3	>10	>10	>10	>10	>10	>10	>10	IGHV1-69	IGHJ3	IGKV1-39	IGKJ2	0.066	0.0404
BD57-1207	BF.7 BTI	D2	0.00129	2.16	0.000587	0.00209	>10	>10	>10	IGHV3-30-3	IGHJ6	IGKV1-12	IGKJ4	0.0551	0.0248
BD57-1208	BF.7 BTI	F3	>10	>10	0.162	0.214	0.740	0.500	0.712	IGHV3-30	IGHJ4	IGLV6-57	IGLJ3	0.0412	0.0213
BD57-1209	BF.7 BTI	F1	>10	>10	>10	>10	>10	>10	>10	IGHV3-13	IGHJ6	IGKV1-39	IGKJ2	0.0273	0.0248
BD57-1210	BF.7 BTI	F1	>10	>10	>10	>10	>10	>10	>10	IGHV3-30	IGHJ4	IGKV1-39	IGKJ2	0.0582	0.0497
BD57-1211	BF.7 BTI	E2.2	0.292	0.243	>10	2.39	>10	>10	>10	IGHV1-46	IGHJ5	IGLV3-21	IGLJ1	0.0595	0.0517
BD57-1212	BF.7 BTI	E3	>10	>10	>10	>10	>10	>10	>10	IGHV4-59	IGHJ4	IGKV2D-29	IGKJ4	0.0632	0.0326
BD57-1213	BF.7 BTI	F1	>10	>10	>10	>10	>10	>10	>10	IGHV3-13	IGHJ6	IGKV1-39	IGKJ1	0.0499	0.0554
BD57-1214	BF.7 BTI	F1	>10	>10	>10	>10	>10	>10	>10	IGHV3-30	IGHJ5	IGKV1-39	IGKJ1	0.0609	0.0338
BD57-1215	BF.7 BTI	A1	0.00312	0.00492	0.0110	>10	>10	>10	>10	IGHV3-53	IGHJ6	IGKV1-9	IGKJ2	0.0621	0.0523
BD57-1216	BF.7 BTI	E3	>10	>10	>10	>10	>10	>10	>10	IGHV4-39	IGHJ3	IGLV2-8	IGLJ3	0.0234	0.0151
BD57-1217	BF.7 BTI	F1	>10	>10	>10	>10	>10	>10	>10	IGHV3-30	IGHJ4	IGKV1-39	IGKJ1	0.0216	0.0308
BD57-1218	BF.7 BTI	F1	>10	>10	>10	>10	>10	>10	>10	IGHV3-43	IGHJ4	IGKV1-39	IGKJ4	0.0554	0.0154
BD57-1219	BF.7 BTI	F1	>10	>10	>10	>10	>10	>10	>10	IGHV3-13	IGHJ5	IGKV1-39	IGKJ1	0.0354	0.0185
BD57-1220	BF.7 BTI	A1	0.00580	0.0370	0.0283	0.288	>10	>10	>10	IGHV3-53	IGHJ6	IGKV1-9	IGKJ3	0.0427	0.0185
BD57-1222	BF.7 BTI	E3	0.858	0.304	0.372	0.406	1.42	1.78	3.39	IGHV5-51	IGHJ4	IGLV3-19	IGLJ1	0.0563	0.0185
BD57-1223	BF.7 BTI	D4	0.00114	0.00326	0.00353	0.00506	0.0939	>10	>10	IGHV1-46	IGHJ3	IGKV1D-12	IGKJ1	0.113	0.0528
BD57-1224	BF.7 BTI	A1	0.0103	0.00589	0.00994	0.0146	0.235	0.764	0.803	IGHV3-53	IGHJ6	IGKV3-20	IGKJ3	0.0678	0.0366
BD57-1225	BF.7 BTI	D3	0.000532	0.000654	0.000677	<0.0005	0.0482	>10	>10	IGHV3-23	IGHJ2	IGLV2-11	IGLJ3	0.0765	0.0585
BD57-1226	BF.7 BTI	E3	1.29	0.879	>10	2.05	>10	>10	>10	IGHV4-34	IGHJ6	IGLV10-54	IGLJ3	0.0623	0.0212
BD57-1227	BF.7 BTI	F1	>10	>10	>10	>10	>10	>10	>10	IGHV3-13	IGHJ6	IGKV3-15	IGKJ5	0.0317	0.0215
BD57-1228	BF.7 BTI	F1	0.194	>10	>10	>10	>10	>10	>10	IGHV3-33	IGHJ1	IGKV1-33	IGKJ2	0.0309	0.0185
BD57-1229	BF.7 BTI	F1	0.106	>10	>10	>10	>10	>10	>10	IGHV1-18	IGHJ4	IGLV1-40	IGLJ1	0.0545	0.0534
BD57-1230	BF.7 BTI	E3	1.26	0.454	0.925	0.643	>10	2.84	1.45	IGHV5-51	IGHJ5	IGLV1-44	IGLJ1	0.0253	0.0242
BD57-1231	BF.7 BTI	A1	0.00298	0.00125	0.00568	0.0261	1.12	>10	1.27	IGHV3-53	IGHJ4	IGLV3-19	IGLJ3	0.0316	0.0277
BD57-1232	BF.7 BTI	E2.2	>10	0.957	4.07	0.484	>10	>10	>10	IGHV2-5	IGHJ4	IGKV1-12	IGKJ5	0.0243	0.0345
BD57-1233	BF.7 BTI	F1	0.100	0.270	0.555	0.434	0.848	0.405	0.500	IGHV3-30	IGHJ4	IGLV1-51	IGLJ3	0.0563	0.0427
BD57-1234	BF.7 BTI	E2.2	0.0566	0.0465	0.00588	0.632	>10	>10	2.30	IGHV1-69	IGHJ4	IGLV1-40	IGLJ1	0.0452	0.0329
BD57-1235	BF.7 BTI	F1	>10	>10	>10	>10	>10	>10	>10	IGHV3-13	IGHJ4	IGKV1-39	IGKJ4	0.0701	0.0369
BD57-1236	BF.7 BTI	E3	>10	>10	>10	>10	>10	>10	>10	IGHV2-5	IGHJ4	IGLV1-44	IGLJ3	0.0268	0.0363
BD57-1237	BF.7 BTI	F1	0.994	>10	>10	>10	>10	>10	>10	IGHV3-30	IGHJ4	IGKV1-39	IGKJ1	0.0409	0.0154
BD57-1238	BF.7 BTI	F1	0.292	>10	>10	>10	>10	>10	>10	IGHV3-74	IGHJ4	IGLV6-57	IGLJ2	0.0391	0.0151
BD57-1240	BF.7 BTI	D2	<0.0005	0.0457	0.00473	0.0204	>10	>10	>10	IGHV2-5	IGHJ4	IGLV2-23	IGLJ2	0.0503	0.0574
BD57-1241	BF.7 BTI	F1	>10	>10	>10	>10	>10	>10	>10	IGHV3-23	IGHJ4	IGKV3D-15	IGKJ4	0.0518	0.0215
BD57-1242	BF.7 BTI	E3	>10	>10	>10	>10	>10	>10	>10	IGHV4-39	IGHJ2	IGLV2-23	IGLJ1	0.0249	0.0308
BD57-1243	BF.7 BTI	E3	>10	>10	>10	>10	>10	>10	>10	IGHV3-30	IGHJ4	IGKV1-33	IGKJ3	0.0405	0.0246
BD57-1244	BF.7 BTI	E2.2	>10	>10	>10	>10	>10	>10	>10	IGHV4-39	IGHJ3	IGLV1-40	IGLJ1	0.0222	0.003
BD57-1245	BF.7 BTI	E2.2	>10	>10	>10	>10	>10	>10	>10	IGHV3-30	IGHJ4	IGKV1-5	IGKJ4	0.0526	0.0186
BD57-1246	BF.7 BTI	A1	0.0135	0.0440	>10	0.183	>10	>10	>10	IGHV3-53	IGHJ4	IGLV3-19	IGLJ3	0.0258	0.0247
BD57-1247	BF.7 BTI	F1	0.357	>10	>10	>10	>10	>10	>10	IGHV1-18	IGHJ3	IGKV1-5	IGKJ2	0.0609	0.04
BD57-1248	BF.7 BTI	E2.2	>10	>10	>10	>10	>10	>10	>10	IGHV3-64D	IGHJ4	IGLV3-21	IGLJ3	0.0475	0.0306
BD57-1249	BF.7 BTI	F1	>10	>10	>10	>10	>10	>10	>10	IGHV1-18	IGHJ5	IGLV3-25	IGLJ3	0.0923	0.0601
BD57-1250	BF.7 BTI	E2.2	>10	>10	>10	>10	>10	>10	>10	IGHV3-48	IGHJ3	IGLV3-21	IGLJ2	0.0369	0.0316
BD57-1251	BF.7 BTI	F1	>10	>10	>10	>10	>10	>10	>10	IGHV3-64	IGHJ3	IGKV1-39	IGKJ2	0.0568	0.0439
BD57-1252	BF.7 BTI	D4	0.000655	0.00208	0.00398	0.00771	0.0228	0.0258	0.0341	IGHV4-30-2	IGHJ5	IGLV1-40	IGLJ3	0.0675	0.0509
BD57-1253	BF.7 BTI	E3	>10	>10	>10	>10	>10	>10	>10	IGHV3-21	IGHJ6	IGKV3-20	IGKJ2	0.042	0.0231
BD57-1254	BF.7 BTI	F1	>10	>10	>10	>10	>10	>10	>10	IGHV3-13	IGHJ3	IGKV1-39	IGKJ1	0.0381	0.0308
BD57-1255	BF.7 BTI	E2.2	0.497	0.302	0.0526	0.162	>10	2.34	3.16	IGHV1-46	IGHJ4	IGLV6-57	IGLJ3	0.0535	0.0419
BD57-1256	BF.7 BTI	D2	0.0191	>10	0.0161	0.118	>10	>10	>10	IGHV2-5	IGHJ4	IGLV1-40	IGLJ1	0.0776	0.0572
BD57-1257	BF.7 BTI	A1	0.00644	0.346	0.153	0.0469	0.403	0.0678	0.0989	IGHV3-30-3	IGHJ4	IGKV1-39	IGKJ1	0.0483	0.028
BD57-1258	BF.7 BTI	E2.2	>10	>10	>10	>10	>10	>10	>10	IGHV2-5	IGHJ3	IGLV1-40	IGLJ2	0.0196	0.0235
BD57-1259	BF.7 BTI	E2.2	>10	>10	>10	>10	>10	>10	>10	IGHV3-23	IGHJ1	IGLV3-21	IGLJ2	0.0381	0.0244
BD57-1260	BF.7 BTI	A1	0.0217	>10	>10	0.0284	0.178	0.447	0.172	IGHV3-53	IGHJ3	IGKV1-33	IGKJ2	0.0568	0.0376
BD57-1262	BF.7 BTI	E3	>10	>10	>10	>10	>10	>10	>10	IGHV3-30	IGHJ4	IGKV1-33	IGKJ4	0.0214	0.0311
BD57-1264	BF.7 BTI	F1	>10	>10	>10	>10	>10	>10	>10	IGHV3-33	IGHJ4	IGKV1-39	IGKJ1	0.0249	0.0402
BD57-1266	BF.7 BTI	E1/E2.1	0.277	>10	>10	>10	>10	>10	>10	IGHV4-39	IGHJ4	IGLV3-21	IGLJ2	0.0247	0.0217
BD57-1267	BF.7 BTI	F1	>10	>10	>10	>10	>10	>10	>10	IGHV3-33	IGHJ5	IGKV1-39	IGKJ1	0.0499	0.0185
BD57-1269	BF.7 BTI	E3	>10	>10	>10	>10	>10	>10	>10	IGHV3-9	IGHJ3	IGKV3-20	IGKJ4	0.0622	0.0246
BD57-1270	BF.7 BTI	E2.2	>10	>10	>10	>10	>10	>10	>10	IGHV1-18	IGHJ4	IGKV3-15	IGKJ1	0.0505	0.0181
BD57-1271	BF.7 BTI	F1	0.0922	0.386	>10	>10	>10	>10	>10	IGHV4-61	IGHJ3	IGKV1-5	IGKJ1	0.0831	0.0373
BD57-1275	BF.7 BTI	F1	>10	>10	>10	>10	>10	>10	>10	IGHV3-13	IGHJ6	IGKV1-39	IGKJ1	0.0339	0.0431
BD57-1276	BF.7 BTI	E3	>10	>10	>10	>10	>10	>10	>10	IGHV3-30	IGHJ4	IGKV3D-15	IGKJ2	0.027	0.0155
BD57-1277	BF.7 BTI	D2	0.0850	>10	0.0270	0.0881	>10	>10	>10	IGHV2-5	IGHJ3	IGKV1-5	IGKJ3	0.0252	0.0095
BD57-1278	BF.7 BTI	E2.2	>10	>10	>10	>10	>10	>10	>10	IGHV3-9	IGHJ4	IGLV3-21	IGLJ1	0.0742	0.0646
BD57-1279	BF.7 BTI	D2	0.00553	>10	0.0213	0.0635	>10	>10	>10	IGHV3-30	IGHJ4	IGLV2-8	IGLJ1	0.0241	0.0091
BD57-1280	BF.7 BTI	F1	0.373	>10	>10	>10	>10	>10	>10	IGHV4-30-4	IGHJ4	IGLV6-57	IGLJ2	0.036	0.0119
BD57-1281	BF.7 BTI	F1	>10	>10	>10	>10	>10	>10	>10	IGHV3-13	IGHJ5	IGKV1-39	IGKJ4	0.0526	0.065
BD57-1282	BF.7 BTI	A1	0.0126	0.00286	0.00719	0.00367	0.351	0.541	0.309	IGHV3-53	IGHJ4	IGKV1-39	IGKJ2	0.0518	0.0585
BD57-1284	BF.7 BTI	D2	0.105	>10	0.0188	0.0289	>10	>10	>10	IGHV2-70	IGHJ5	IGLV1-51	IGLJ3	0.0381	0.0332
BD57-1285	BF.7 BTI	A1	0.0159	0.0152	0.0132	0.0124	0.124	1.16	0.942	IGHV3-53	IGHJ4	IGKV1-39	IGKJ2	0.0708	0.0836
BD57-1286	BF.7 BTI	A1	0.00292	0.00113	0.00304	0.0249	0.0938	0.743	0.946	IGHV3-7	IGHJ4	IGKV1-NL1	IGKJ2	0.0627	0.0776
BD57-1287	BF.7 BTI	D2	<0.0005	0.0176	0.00343	0.00332	>10	>10	>10	IGHV2-5	IGHJ4	IGLV2-23	IGLJ2	0.0587	0.0332
BD57-1288	BF.7 BTI	F1	>10	>10	>10	>10	>10	>10	>10	IGHV3-21	IGHJ4	IGKV1-39	IGKJ4	0.0577	0.0308
BD57-1291	BF.7 BTI	E2.2	>10	>10	>10	>10	>10	>10	>10	IGHV3-33	IGHJ3	IGKV3-20	IGKJ3	0.0494	0.0183
BD57-1292	BF.7 BTI	F1	>10	>10	>10	>10	>10	>10	>10	IGHV3-64D	IGHJ4	IGKV1-39	IGKJ2	0.0385	0.0062
BD57-1293	BF.7 BTI	F1	>10	>10	>10	>10	>10	>10	>10	IGHV3-13	IGHJ2	IGKV1-39	IGKJ2	0.0989	0.0523
BD57-1294	BF.7 BTI	F1	>10	>10	>10	>10	>10	>10	>10	IGHV3-13	IGHJ2	IGKV1-39	IGKJ5	0.03	0.0185
BD57-1295	BF.7 BTI	A1	0.00716	<0.0005	<0.0005	0.00156	0.0297	0.0728	0.0334	IGHV3-66	IGHJ6	IGLV3-21	IGLJ3	0.0822	0.0431
BD57-1296	BF.7 BTI	E3	>10	>10	>10	>10	>10	>10	>10	IGHV4-39	IGHJ6	IGKV3-11	IGKJ4	0.0333	0.0185
BD57-1297	BF.7 BTI	E1/E2.1	0.138	0.188	0.0366	0.0553	>10	>10	>10	IGHV4-61	IGHJ5	IGLV6-57	IGLJ2	0.0268	0.0453
BD57-1298	BF.7 BTI	F1	0.699	>10	>10	>10	>10	>10	>10	IGHV3-13	IGHJ2	IGKV1-NL1	IGKJ5	0.0416	0.0124
BD57-1299	BF.7 BTI	E3	>10	>10	>10	>10	>10	>10	>10	IGHV4-59	IGHJ4	IGKV3-20	IGKJ4	0.0501	0.0373
BD57-1300	BF.7 BTI	A1	0.0123	0.108	0.174	0.0722	>10	>10	>10	IGHV3-53	IGHJ6	IGKV1-12	IGKJ4	0.037	0.0282
BD57-1301	BF.7 BTI	F1	>10	>10	>10	>10	>10	>10	>10	IGHV3-13	IGHJ6	IGKV1-39	IGKJ2	0.0328	0.0277
BD57-1302	BF.7 BTI	D3	0.0237	0.00282	0.00685	0.00499	0.0279	0.00334	0.0118	IGHV1-18	IGHJ6	IGKV1-39	IGKJ4	0.0726	0.069
BD57-1303	BF.7 BTI	E2.2	0.0841	0.185	0.0258	1.05	>10	>10	>10	IGHV1-69	IGHJ4	IGLV2-14	IGLJ1	0.0726	0.0544
BD57-1304	BF.7 BTI	A1	0.00287	0.00272	0.00194	0.00942	>10	>10	>10	IGHV3-53	IGHJ4	IGKV3-20	IGKJ1	0.0511	0.0277
BD57-1305	BF.7 BTI	E2.2	>10	>10	>10	>10	>10	>10	>10	IGHV2-5	IGHJ4	IGKV1-39	IGKJ2	0.027	0.0311
BD57-1306	BF.7 BTI	F1	>10	>10	>10	>10	>10	>10	>10	IGHV3-13	IGHJ3	IGKV1-39	IGKJ1	0.0163	0.0338
BD57-1307	BF.7 BTI	A1	0.00330	0.00228	0.00274	0.00294	0.289	0.794	1.48	IGHV3-53	IGHJ4	IGKV1-39	IGKJ4	0.0966	0.0621
BD57-1310	BF.7 BTI	F1	>10	>10	>10	>10	>10	>10	>10	IGHV3-13	IGHJ2	IGKV1-39	IGKJ1	0.029	0.0308
BD57-1311	BF.7 BTI	A1	0.00122	0.0747	0.106	0.132	0.195	0.714	0.966	IGHV3-11	IGHJ4	IGKV1-NL1	IGKJ1	0.0545	0.0369
BD57-1313	BF.7 BTI	E2.2	0.0635	0.257	0.0939	1.90	>10	>10	>10	IGHV1-69	IGHJ4	IGLV1-40	IGLJ2	0.0402	0.0297
BD57-1314	BF.7 BTI	E2.2	>10	>10	>10	>10	>10	>10	>10	IGHV3-23	IGHJ3	IGLV3-21	IGLJ2	0.0346	0.0253
BD57-1316	BF.7 BTI	E1/E2.1	0.0867	0.806	0.179	1.51	>10	>10	>10	IGHV4-31	IGHJ5	IGLV1-47	IGLJ2	0.0892	0.0515
BD57-1317	BF.7 BTI	A1	0.0200	0.0154	0.0210	0.0377	>10	>10	>10	IGHV3-53	IGHJ4	IGKV3-20	IGKJ2	0.0868	0.04
BD57-1318	BF.7 BTI	D2	0.00590	0.452	0.0709	0.0248	>10	>10	>10	IGHV2-5	IGHJ4	IGLV2-14	IGLJ3	0.0447	0.052
BD57-1319	BF.7 BTI	A1	0.00771	0.0724	0.0829	0.166	>10	>10	>10	IGHV3-66	IGHJ3	IGKV1-9	IGKJ4	0.0648	0.0284
BD57-1320	BF.7 BTI	E2.2	>10	>10	>10	>10	>10	>10	>10	IGHV3-11	IGHJ4	IGLV3-21	IGLJ2	0.0333	0.0186
BD57-1321	BF.7 BTI	A1	0.0106	0.0972	0.0604	0.498	>10	>10	>10	IGHV3-66	IGHJ3	IGKV1-9	IGKJ4	0.0394	0.0187
BD57-1322	BF.7 BTI	A1	0.00293	0.0256	0.0251	0.0544	1.08	>10	>10	IGHV3-53	IGHJ6	IGKV1-9	IGKJ3	0.037	0.0246
BD57-1323	BF.7 BTI	D2	0.0266	>10	0.183	0.613	>10	>10	>10	IGHV2-5	IGHJ4	IGLV2-14	IGLJ2	0.014	0.018
BD57-1324	BF.7 BTI	D2	0.0534	>10	0.143	0.471	>10	>10	>10	IGHV2-70	IGHJ5	IGLV1-51	IGLJ3	0.0272	0.0181
BD57-1327	BF.7 BTI	A1	0.00183	0.0347	0.756	0.103	>10	>10	>10	IGHV3-53	IGHJ4	IGLV1-40	IGLJ3	0.0696	0.0359
BD57-1328	BF.7 BTI	A1	0.00582	0.00861	0.00967	0.134	>10	>10	1.97	IGHV3-53	IGHJ6	IGKV1-9	IGKJ3	0.0571	0.0246
BD57-1329	BF.7 BTI	A1	0.00513	>10	>10	0.407	>10	>10	>10	IGHV3-53	IGHJ6	IGKV1-9	IGKJ3	0.054	0.0127
BD57-1330	BF.7 BTI	F1	>10	>10	>10	>10	>10	>10	>10	IGHV4-59	IGHJ4	IGKV1-33	IGKJ4	0.0388	0.0621
BD57-1331	BF.7 BTI	E3	>10	>10	>10	>10	>10	>10	>10	IGHV3-30	IGHJ4	IGKV1-33	IGKJ5	0.05	0.0342
BD57-1332	BF.7 BTI	A1	>10	>10	>10	>10	>10	>10	>10	IGHV3-30	IGHJ6	IGKV1-27	IGKJ3	0.0156	0.0311
BD57-1334	BF.7 BTI	E3	>10	>10	>10	>10	>10	>10	>10	IGHV3-30	IGHJ4	IGKV1-33	IGKJ5	0.0131	0.0124
BD57-1335	BF.7 BTI	A1	0.0132	0.00133	0.000669	0.0207	>10	>10	>10	IGHV3-53	IGHJ4	IGKV1-33	IGKJ3	0.0247	0.0215
BD57-1336	BF.7 BTI	C/D1	>10	0.828	0.0318	0.250	0.434	>10	>10	IGHV3-30-3	IGHJ4	IGKV1-33	IGKJ4	0	0
BD57-1337	BF.7 BTI	E3	>10	>10	>10	>10	>10	>10	>10	IGHV1-46	IGHJ4	IGKV1-39	IGKJ2	0.0186	0.0311
BD57-1338	BF.7 BTI	C/D1	>10	0.596	0.0473	0.0306	0.0335	>10	>10	IGHV3-30	IGHJ4	IGKV1-16	IGKJ2	0.0169	0.0031
BD57-1340	BF.7 BTI	E1/E2.1	>10	>10	>10	>10	>10	>10	>10	IGHV4-4	IGHJ3	IGKV1-39	IGKJ3	0.0507	0.0404
BD57-1341	BF.7 BTI	A1	>10	>10	>10	0.0944	0.306	>10	>10	IGHV3-11	IGHJ6	IGKV1-39	IGKJ1	0.0107	0.0124
BD57-1342	BF.7 BTI	F3	>10	>10	0.492	0.213	>10	>10	>10	IGHV4-59	IGHJ4	IGKV1-33	IGKJ2	0.0573	0.0281
BD57-1343	BF.7 BTI	E3	>10	>10	>10	>10	>10	>10	>10	IGHV3-33	IGHJ6	IGKV1-33	IGKJ4	0.0303	0.0342
BD57-1344	BF.7 BTI	E1/E2.1	>10	0.563	0.00483	0.00446	0.0381	0.306	0.113	IGHV4-59	IGHJ4	IGKV1-12	IGKJ1	0.0256	0.0093
BD57-1345	BF.7 BTI	E3	>10	>10	>10	>10	>10	>10	>10	IGHV1-46	IGHJ4	IGKV1-5	IGKJ1	0.0243	0.0311
BD57-1346	BF.7 BTI	C/D1	>10	0.732	0.00592	0.00930	0.0253	>10	>10	IGHV3-30	IGHJ4	IGKV1-5	IGKJ1	0.0142	0.0094
BD57-1350	BF.7 BTI	F1	1.25	>10	>10	>10	>10	>10	>10	IGHV3-53	IGHJ3	IGKV1-5	IGKJ2	0.0749	0.0431
BD57-1351	BF.7 BTI	C/D1	>10	>10	>10	0.260	1.13	>10	>10	IGHV5-51	IGHJ4	IGKV1-39	IGKJ2	0.0388	0.0523
BD57-1352	BF.7 BTI	C/D1	>10	>10	>10	0.189	1.04	>10	>10	IGHV5-51	IGHJ4	IGKV1-39	IGKJ2	0.0416	0.0554
BD57-1354	BF.7 BTI	D4	>10	0.302	0.00306	0.00445	0.00584	0.0208	0.0256	IGHV5-51	IGHJ6	IGKV2-28	IGKJ1	0.0193	0.012
BD57-1355	BF.7 BTI	E3	>10	>10	>10	>10	>10	>10	>10	IGHV3-9	IGHJ4	IGKV4-1	IGKJ4	0.0247	0.0087
BD57-1356	BF.7 BTI	A1	>10	>10	>10	1.07	>10	>10	>10	IGHV3-30	IGHJ6	IGKV4-1	IGKJ3	0.0106	0.0029
BD57-1357	BF.7 BTI	E3	>10	>10	>10	>10	>10	>10	>10	IGHV4-34	IGHJ4	IGKV4-1	IGKJ1	0.0375	0.0029
BD57-1358	BF.7 BTI	A1	>10	>10	0.965	0.0794	0.364	0.201	0.268	IGHV3-30	IGHJ6	IGKV4-1	IGKJ3	0.0104	0.0058
BD57-1360	BF.7 BTI	A2	>10	>10	1.01	0.0343	0.0835	0.0716	0.0752	IGHV3-30	IGHJ6	IGKV2-28	IGKJ2	0.0026	0
BD57-1361	BF.7 BTI	A2	>10	>10	>10	0.0536	0.531	0.377	0.440	IGHV3-30	IGHJ6	IGKV2-28	IGKJ2	0.0078	0
BD57-1363	BF.7 BTI	E2.2	>10	>10	>10	>10	>10	>10	>10	IGHV3-30	IGHJ6	IGKV2-30	IGKJ3	0.0403	0.003
BD57-1364	BF.7 BTI	D3	>10	<0.0005	0.00183	0.00218	>10	>10	>10	IGHV5-51	IGHJ3	IGKV3D-20	IGKJ1	0.0113	0.0091
BD57-1365	BF.7 BTI	E3	>10	>10	>10	>10	>10	>10	>10	IGHV1-46	IGHJ4	IGKV3-11	IGKJ4	0.0436	0.0154
BD57-1366	BF.7 BTI	A2	>10	>10	>10	1.74	>10	0.866	2.44	IGHV2-5	IGHJ3	IGKV3-11	IGKJ5	0.0053	0.0031
BD57-1367	BF.7 BTI	F3	>10	0.388	3.21	0.251	0.946	0.340	0.737	IGHV2-5	IGHJ4	IGKV3-11	IGKJ5	0.0026	0.0093
BD57-1369	BF.7 BTI	D3	>10	0.0410	0.0326	0.0556	>10	>10	>10	IGHV5-51	IGHJ3	IGKV3-20	IGKJ1	0.0196	0.0092
BD57-1370	BF.7 BTI	A1	0.0773	0.163	0.0163	0.0210	0.0894	0.115	0.0781	IGHV3-66	IGHJ5	IGKV3-15	IGKJ1	0.0407	0.0215
BD57-1371	BF.7 BTI	A1	>10	>10	0.227	0.0516	0.647	0.386	0.582	IGHV2-5	IGHJ5	IGKV3-15	IGKJ2	0.0107	0.0063
BD57-1372	BF.7 BTI	A1	0.199	0.0136	0.00891	0.00892	0.343	>10	0.775	IGHV3-53	IGHJ5	IGKV3-15	IGKJ2	0.0194	0.0183
BD57-1373	BF.7 BTI	F3	>10	1.97	0.952	0.0911	>10	2.03	4.62	IGHV2-5	IGHJ5	IGKV3-15	IGKJ2	0.0185	0.0062
BD57-1374	BF.7 BTI	F3	>10	>10	>10	0.205	>10	>10	>10	IGHV2-5	IGHJ4	IGKV3-15	IGKJ5	0.0053	0.0031
BD57-1375	BF.7 BTI	F3	>10	>10	>10	1.11	1.24	1.11	0.854	IGHV2-5	IGHJ4	IGKV3-15	IGKJ1	0.0107	0
BD57-1376	BF.7 BTI	A2	>10	>10	>10	>10	>10	>10	>10	IGHV2-5	IGHJ4	IGKV3-15	IGKJ1	0.0452	0.0217
BD57-1377	BF.7 BTI	C/D1	>10	>10	>10	>10	>10	>10	>10	IGHV7-4-1	IGHJ4	IGKV3-20	IGKJ2	0.0592	0.0396
BD57-1378	BF.7 BTI	E3	>10	>10	>10	>10	>10	>10	>10	IGHV4-39	IGHJ6	IGKV3-20	IGKJ4	0.0519	0.0363
BD57-1379	BF.7 BTI	F3	>10	>10	0.530	0.263	0.384	0.304	0.401	IGHV2-5	IGHJ5	IGKV3-15	IGKJ2	0.008	0.0125
BD57-1381	BF.7 BTI	F1	>10	>10	1.78	1.23	1.86	0.970	1.12	IGHV4-39	IGHJ6	IGLV6-57	IGLJ3	0.014	0.003
BD57-1382	BF.7 BTI	E3	>10	>10	>10	>10	>10	>10	>10	IGHV3-30	IGHJ4	IGLV6-57	IGLJ3	0.0459	0.021
BD57-1383	BF.7 BTI	D4	>10	>10	>10	0.424	>10	>10	>10	IGHV4-30-4	IGHJ5	IGLV6-57	IGLJ2	0.0417	0.0182
BD57-1385	BF.7 BTI	A1	>10	0.0160	0.0406	0.0502	0.0850	>10	1.39	IGHV3-13	IGHJ3	IGLV9-49	IGLJ3	0.0994	0.0634
BD57-1386	BF.7 BTI	B	>10	1.25	>10	0.0334	0.0600	>10	0.221	IGHV3-13	IGHJ3	IGLV9-49	IGLJ1	0.0192	0.0057
BD57-1388	BF.7 BTI	D2	>10	0.00570	0.00501	0.0218	>10	>10	>10	IGHV2-70	IGHJ4	IGLV2-14	IGLJ1	0.0272	0.0363
BD57-1389	BF.7 BTI	D3	>10	0.0385	0.0110	0.0246	0.0707	>10	>10	IGHV5-51	IGHJ4	IGLV2-14	IGLJ3	0.0253	0.0393
BD57-1390	BF.7 BTI	F3	>10	>10	0.0467	0.0285	0.266	0.115	0.202	IGHV4-34	IGHJ4	IGLV2-14	IGLJ3	0.0223	0.0091
BD57-1394	BF.7 BTI	E3	>10	>10	>10	>10	>10	>10	>10	IGHV4-39	IGHJ4	IGLV2-14	IGLJ3	0.0239	0.0092
BD57-1395	BF.7 BTI	D2	0.00150	0.0314	0.000761	<0.0005	>10	>10	>10	IGHV2-5	IGHJ4	IGLV2-8	IGLJ2	0.0503	0.0453
BD57-1397	BF.7 BTI	E3	>10	>10	>10	>10	>10	>10	>10	IGHV3-48	IGHJ6	IGLV2-11	IGLJ2	0.0645	0.0246
BD57-1398	BF.7 BTI	E3	>10	>10	>10	>10	>10	>10	>10	IGHV5-51	IGHJ4	IGLV1-44	IGLJ2	0.0194	0.018
BD57-1399	BF.7 BTI	A2	>10	>10	0.268	0.0536	0.0877	0.0440	0.0492	IGHV3-33	IGHJ6	IGLV1-44	IGLJ1	0.013	0.0121
BD57-1400	BF.7 BTI	C/D1	>10	>10	>10	>10	>10	>10	>10	IGHV1-18	IGHJ5	IGLV1-44	IGLJ3	0.0216	0.0091
BD57-1401	BF.7 BTI	C/D1	>10	>10	1.25	0.420	1.46	>10	>10	IGHV5-51	IGHJ4	IGLV1-44	IGLJ1	0.016	0.006
BD57-1402	BF.7 BTI	D2	>10	0.575	0.00468	>10	>10	>10	>10	IGHV2-5	IGHJ4	IGLV1-44	IGLJ3	0	0.009
BD57-1404	BF.7 BTI	C/D1	>10	>10	>10	0.224	>10	>10	>10	IGHV5-51	IGHJ4	IGLV1-44	IGLJ1	0.0322	0.006
BD57-1405	BF.7 BTI	B	>10	0.0745	0.0544	0.00211	0.0799	>10	>10	IGHV1-69	IGHJ4	IGLV1-44	IGLJ3	0.0403	0.0211
BD57-1406	BF.7 BTI	B	>10	>10	>10	0.0199	0.193	0.107	0.141	IGHV1-69	IGHJ4	IGLV1-44	IGLJ3	0.0512	0.0274
BD57-1408	BF.7 BTI	A1	2.07	0.118	0.0811	0.0375	0.605	0.890	0.584	IGHV3-53	IGHJ5	IGLV1-51	IGLJ3	0.0168	0.009
BD57-1410	BF.7 BTI	C/D1	>10	2.13	0.0432	0.0516	0.0720	>10	>10	IGHV5-51	IGHJ4	IGLV1-51	IGLJ1	0.0106	0.0154
BD57-1411	BF.7 BTI	A2	>10	>10	>10	0.0791	0.196	0.158	0.112	IGHV4-39	IGHJ4	IGLV1-40	IGLJ1	0.0676	0.0302
BD57-1413	BF.7 BTI	A2	>10	>10	>10	0.0586	>10	>10	>10	IGHV4-34	IGHJ4	IGLV1-40	IGLJ1	0.0522	0.0181
BD57-1415	BF.7 BTI	D4	>10	>10	0.0155	0.0114	0.0547	>10	>10	IGHV1-69	IGHJ4	IGLV1-40	IGLJ1	0.0114	0.006
BD57-1416	BF.7 BTI	A2	>10	>10	>10	0.0447	0.111	0.0987	0.105	IGHV4-39	IGHJ4	IGLV1-40	IGLJ1	0.0432	0.0241
BD57-1418	BF.7 BTI	A1	>10	>10	>10	>10	>10	>10	>10	IGHV3-33	IGHJ6	IGLV3-19	IGLJ2	0.0108	0.0092
BD57-1419	BF.7 BTI	F3	>10	0.162	0.00929	0.0130	0.00753	0.0282	0.0423	IGHV3-48	IGHJ4	IGLV3-19	IGLJ2	0.0135	0.0092
BD57-1420	BF.7 BTI	F3	>10	>10	>10	>10	>10	>10	>10	IGHV3-33	IGHJ3	IGLV3-19	IGLJ3	0.118	0.0708
BD57-1422	BF.7 BTI	E1/E2.1	>10	1.78	0.0255	0.0220	0.615	>10	0.880	IGHV3-30-3	IGHJ5	IGLV3-1	IGLJ3	0.0026	0.0125
BD57-1425	BF.7 BTI	E1/E2.1	>10	>10	>10	>10	>10	>10	>10	IGHV4-34	IGHJ4	IGLV3-21	IGLJ1	0.0931	0.08
BD57-1428	BF.7 BTI	E2.2	>10	>10	>10	>10	>10	>10	>10	IGHV4-31	IGHJ5	IGLV3-21	IGLJ2	0.0111	0.003
BD55-3372	SARS convalescents	F3	0.00680	0.0203	0.0322	0.0148	0.0231	0.0120	0.0187	IGHV3-21	IGHJ4	IGLV1-40	IGLJ2	0.06	0.05
BD55-4637	SARS convalescents	D4	0.0201	0.0227	0.0225	0.0243	0.0189	0.0277	0.0230	IGHV2-5	IGHJ3	IGLV1-44	IGLJ2	0.07	0.05
BD55-5483	SARS convalescents	F3	0.0138	0.00647	0.0133	0.00394	0.00284	0.00436	0.00743	IGHV1-69	IGHJ3	IGKV1-33	IGKJ2	0.08	0.06
BD55-5514	SARS convalescents	F3	0.0107	0.00169	0.00722	0.00504	0.00478	0.00598	0.00613	IGHV1-69	IGHJ3	IGKV1-33	IGKJ2	0.06	0.02
BD55-5840	SARS convalescents	D3	0.00100	0.00440	0.00512	0.00393	0.651	>10	>10	IGHV7-4-1	IGHJ4	IGKV3-15	IGKJ4	0.06	0.04
DXP-604	WT convalescents	A1	0.0110	0.285	0.219	6.26	>10	>10	>10	IGHV3-53	IGHJ6	IGKV1-9	IGKJ2	0.0142	0.0155
S2H97	WT convalescents	E3	0.574	2.56	2.70	2.79	1.89	3.62	4.81	IGHV5-51	IGHJ4	IGLV2-14	IGLJ1	--	--
C576	WT convalescents	D3	0.00540	0.0628	0.792	0.704	>10	>10	>10	IGHV1-69	IGHJ4	IGKV3-20	IGKJ1	--	--
C581	WT convalescents	E1/E2.1	0.0655	0.227	0.314	2.25	>10	>10	>10	IGHV5-51	IGHJ4	IGLV1-44	IGLJ2	--	--
LY-CoV1404	WT convalescents	D2	0.00100	0.00100	0.000869	0.000862	1.31	>10	>10	IGHV2-5	IGHJ1	IGLV2-14	IGLJ2	--	--
Ehling_mAb-50	WT convalescents	D2	0.471	>10	0.931	0.973	>10	>10	>10	IGHV4-38-2	IGHJ5	IGKV1-5	IGKJ4	--	--
BRII-196	WT convalescents	A1	0.0532	7.12	8.53	7.12	>10	>10	>10	IGHV3-66	IGHJ6	IGKV3-20	IGKJ2	--	--
COV2-2046	WT convalescents	A1	0.00237	0.00485	0.00450	0.180	0.581	>10	>10	IGHV3-9	IGHJ6	IGKV1-39	IGKJ2	--	--
COV2-2068	WT convalescents	A1	0.0217	0.0701	0.115	0.0427	>10	>10	>10	IGHV3-66	IGHJ3	IGLV1-40	IGLJ2	--	--
COV2-2258	WT convalescents	F1	0.579	3.60	2.78	3.79	>10	>10	>10	IGHV3-20	IGHJ3	IGKV3-20	IGKJ4	--	--
BG7-15	WT convalescents	D2	0.00150	>10	0.543	0.889	>10	>10	>10	IGHV1-18	IGHJ5	IGKV3-20	IGKJ2	--	--
BD55-1205	WT convalescents	A1	0.00331	0.00520	0.00551	0.00348	0.00933	0.00635	0.00578	IGHV3-66	IGHJ5	IGKV3-15	IGKJ1	0.0625	0.0557
BD60-0224	WT mouse	F3	0.0114	0.00394	0.00593	0.00650	0.00546	0.0202	0.0365	IGHV14-3	IGHJ2	IGKV14-111	IGKJ4	0.0168	0.0155
BD60-0266	WT mouse	F3	0.00993	0.00488	0.00678	0.00697	0.00378	0.0198	0.0371	IGHV14-3	IGHJ4	IGKV14-111	IGKJ4	0.0327	0.0217
